# Supplementary material for: Impact of Artificial Intelligence Generated Feedback on Math Quiz Scores
Source: Research Square preprint supplement (doi:10.21203/rs.3.rs-7110559/v1), 2025-07-21
Supplement: Supplementary file 1 [file e6039d40c1c713b9073fca22.xlsx]

## Sheet: Aggregated by Student
STATISTICAL ANALYSIS OF DATA
GRADE 1 TO 10, GROUP A & B
Mininum 3 Modules per Student
												GRADE 1										GRADE 2												GRADE 3													GRADE 4
	Grade 1-10, Group A vs B Statistics			Grade 1-10, Group A, Statistics			Grade 1-10, Group A	Ave. of Ave.		Group R/W Students		01A01	01A02	01A03	01A04	01A05	01A06	01A07	01A08	01A09		02A01	02A02	02A03	02A04	02A05	02A06	02A07	02A08	02A09	02A10	02A11		03A01	03A02	03A03	03A04	03A05	03A06	03A07	03A08	03A09	03A10	03A11			04A01	04A02	04A03
	T-Test, 1-Tail, A-Pre vs B-Pre	0.345955		Ave. Delta Score Uplift	7.92645		Quiz Modules Taken, Min 3	8.3		Quiz Modules Taken, Min 3		4	5	10	14	14	7	6	6													6			4		3	3	3	7			5				6		6
	T-Test, 1-Tail, A-Post vs B-Post	0.0625371		Pre-Quiz Scores Std. Deviation	11.3638		Ave. Pre-Quiz Score	42.4932		Ave. Pre-Quiz Score		2.5	2.4	3	1.57143	2.85714	2.57143	4	3.66667													3.33333			4		5.33333	6	6	4.85714			5.6				5.33333		5.66667
	T-Test, 1-Tail, A-Delta vs B-Delta	0.00718726		Group A Sigma	0.697515		Ave. Post-Quiz Score	50.4196		Ave. Post-Quiz Score		3	2.8	3.2	3.28571	3.85714	4.28571	4.33333	5													5			6.5		4	8.66667	4.66667	6.85714			6.8				4		6
	Total Valid Takers Group A	90		T-Test, 1-Tail, Pre vs Post Quiz	0.000183526		Delta Score, Uplift	7.92645				0.5	0.4	0.2	1.71429	1	1.71429	0.333333	1.33333													1.66667			2.5		-1.33333	2.66667	-1.33333	2			1.2				-1.33333		0.333333
	Total Valid Quizzes Group A	747		Hake's Normalized Gain g	0.137835		Post-Quiz Scores Std. Dev.	17.3037
	Total Valid Takers Group B	80					Std. Dev. of No. of Quiz Taken	44.7829				GRADE 1										GRADE 2												GRADE 3													GRADE 4
	Total Valid Quizzes Group B	601		Grade 1-10, Group B, Statistics			Grade 1-10, Group B	Ave. of Ave.		Group AI Students		01B01	01B02	01B03	01B04	01B05	01B06	01B07	01B08			02B01	02B02	02B03	02B04	02B05	02B06	02B07	02B08	02B09	02B10			03B01	03B02	03B03	03B04	03B05	03B06	03B07	03B08	03B09	03B10	03B11	03B12		04B01	04B02	04B03
	Std Deviation of Delta Scores A	12.7127		Ave. Delta Score Uplift	12.6035		Quiz Modules Taken, Min 3	7.5125		Quiz Modules Taken, Min 3		8	4	7	6	8	7		3						3					4				7						3							6	6	4
	Std Deviation of Delta Scores B	11.8301		Pre-Quiz Scores Std. Deviation	11.993		Ave. Pre-Quiz Score	41.7818		Ave. Pre-Quiz Score		2.5	5	2.57143	1.33333	1.75	2		4						5.33333					4				1.71429						4.66667							2.66667	5	3.5
	Pooled Std Deviation of Delta A&B	12.3056		Group B Sigma	1.0509		Ave. Post-Quiz Score	54.3852		Ave. Post-Quiz Score		5.25	8	3.42857	1.33333	3.75	2.57143		6.66667						7.33333					4				3.71429						7.33333							4.66667	6	6
	Cohen's Number d	0.395348		T-Test, 1-Tail, Pre vs Post Quiz	4.24812e-08		Delta Score, Uplift	12.6035				2.75	3	0.857143	0	2	0.571429		2.66667						2					0				2						2.66667							2	1	2.5
				Hake's Normalized Gain g	0.216486		Post-Quiz Scores Std. Dev.	16.0853
							Std. Dev. of No. of Quiz Taken	38.6478
												GRADE 1										GRADE 2												GRADE 3													GRADE 4
	Grade 1-10, Group A vs B Statistics, w/o 2&3			Grade 1-10, Group A, Statistics			Grade 1-10, Group A	Ave. of Ave.		Group R/W Students		01A01	01A02	01A03	01A04	01A05	01A06	01A07	01A08	01A09		02A01	02A02	02A03	02A04	02A05	02A06	02A07	02A08	02A09	02A10	02A11		03A01	03A02	03A03	03A04	03A05	03A06	03A07	03A08	03A09	03A10	03A11			04A01	04A02	04A03
	T-Test, 1-Tail, A-Pre vs B-Pre	0.485267		Ave. Delta Score Uplift	7.70739		Quiz Modules Taken, Min 3	8.62651		Quiz Modules Taken, Min 3		4	5	10	14	14	7	6	6																												6		6
	T-Test, 1-Tail, A-Post vs B-Post	0.0371166		Pre-Quiz Scores Std. Deviation	11.2718		Ave. Pre-Quiz Score	41.8452		Ave. Pre-Quiz Score		2.5	2.4	3	1.57143	2.85714	2.57143	4	3.66667																												5.33333		5.66667
	T-Test, 1-Tail, A-Delta vs B-Delta	0.00817619		Group A Sigma	0.683778		Ave. Post-Quiz Score	49.5526		Ave. Post-Quiz Score		3	2.8	3.2	3.28571	3.85714	4.28571	4.33333	5																												4		6
	Total Valid Takers Group A	83		T-Test, 1-Tail, Pre vs Post Quiz	0.000405272		Delta Score, Uplift	7.70739				0.5	0.4	0.2	1.71429	1	1.71429	0.333333	1.33333																												-1.33333		0.333333
	Total Valid Quizzes Group A	716		Hake's Normalized Gain g	0.132532		Post-Quiz Scores Std. Dev.	17.2139
	Total Valid Takers Group B	76					Std. Dev. of No. of Quiz Taken	44.9311				GRADE 1										GRADE 2												GRADE 3													GRADE 4
	Total Valid Quizzes Group B	584		Grade 1-10, Group B, Statistics			Grade 1-10, Group B	Ave. of Ave.		Group AI Students		01B01	01B02	01B03	01B04	01B05	01B06	01B07	01B08			02B01	02B02	02B03	02B04	02B05	02B06	02B07	02B08	02B09	02B10			03B01	03B02	03B03	03B04	03B05	03B06	03B07	03B08	03B09	03B10	03B11	03B12		04B01	04B02	04B03
	Std Deviation of Delta Scores A	12.393		Ave. Delta Score Uplift	12.3896		Quiz Modules Taken, Min 3	7.68421		Quiz Modules Taken, Min 3		8	4	7	6	8	7		3																												6	6	4
	Std Deviation of Delta Scores B	11.8809		Pre-Quiz Scores Std. Deviation	11.885		Ave. Pre-Quiz Score	41.9131		Ave. Pre-Quiz Score		2.5	5	2.57143	1.33333	1.75	2		4																												2.66667	5	3.5
	Pooled Std Deviation of Delta A&B	12.1511		Group B Sigma	1.04246		Ave. Post-Quiz Score	54.3027		Ave. Post-Quiz Score		5.25	8	3.42857	1.33333	3.75	2.57143		6.66667																												4.66667	6	6
	Cohen's Number d	0.394096		T-Test, 1-Tail, Pre vs Post Quiz	1.17722e-07		Delta Score, Uplift	12.3896				2.75	3	0.857143	0	2	0.571429		2.66667																												2	1	2.5
				Hake's Normalized Gain g	0.213294		Post-Quiz Scores Std. Dev.	16.0072
							Std. Dev. of No. of Quiz Taken	38.7199
												GRADE 1										GRADE 2												GRADE 3													GRADE 4
	Grade 1-6, Group A vs B Statistics			Grade 1-6, Group A, Statistics			Grade 1-6, Group A	Ave. of Ave.		Group R/W Students		01A01	01A02	01A03	01A04	01A05	01A06	01A07	01A08	01A09		02A01	02A02	02A03	02A04	02A05	02A06	02A07	02A08	02A09	02A10	02A11		03A01	03A02	03A03	03A04	03A05	03A06	03A07	03A08	03A09	03A10	03A11			04A01	04A02	04A03
	T-Test, 1-Tail, A-Pre vs B-Pre	0.25419		Ave. Delta Score Uplift	7.25577		Quiz Modules Taken, Min 3	7.69767		Quiz Modules Taken, Min 3		4	5	10	14	14	7	6	6													6			4		3	3	3	7			5				6		6
	T-Test, 1-Tail, A-Post vs B-Post	0.088161		Pre-Quiz Scores Std. Deviation	11.1728		Ave. Pre-Quiz Score	39.3166		Ave. Pre-Quiz Score		2.5	2.4	3	1.57143	2.85714	2.57143	4	3.66667													3.33333			4		5.33333	6	6	4.85714			5.6				5.33333		5.66667
	T-Test, 1-Tail, A-Delta vs B-Delta	0.00747511		Group A Sigma	0.649414		Ave. Post-Quiz Score	46.5723		Ave. Post-Quiz Score		3	2.8	3.2	3.28571	3.85714	4.28571	4.33333	5													5			6.5		4	8.66667	4.66667	6.85714			6.8				4		6
	Total Valid Takers Group A	43		T-Test, 1-Tail, Pre vs Post Quiz	0.00678281		Delta Score, Uplift	7.25577				0.5	0.4	0.2	1.71429	1	1.71429	0.333333	1.33333													1.66667			2.5		-1.33333	2.66667	-1.33333	2			1.2				-1.33333		0.333333
	Total Valid Quizzes Group A	331		Hake's Normalized Gain g	0.119568		Post-Quiz Scores Std. Dev.	15.2038
	Total Valid Takers Group B	40					Std. Dev. of No. of Quiz Taken	45.9573				GRADE 1										GRADE 2												GRADE 3													GRADE 4
	Total Valid Quizzes Group B	288		Grade 1-6, Group B, Statistics			Grade 1-6, Group B	Ave. of Ave.		Group AI Students		01B01	01B02	01B03	01B04	01B05	01B06	01B07	01B08			02B01	02B02	02B03	02B04	02B05	02B06	02B07	02B08	02B09	02B10			03B01	03B02	03B03	03B04	03B05	03B06	03B07	03B08	03B09	03B10	03B11	03B12		04B01	04B02	04B03
	Std Deviation of Delta Scores A	11.9771		Ave. Delta Score Uplift	13.5838		Quiz Modules Taken, Min 3	7.2		Quiz Modules Taken, Min 3		8	4	7	6	8	7		3						3					4				7						3							6	6	4
	Std Deviation of Delta Scores B	11.1465		Pre-Quiz Scores Std. Deviation	11.6859		Ave. Pre-Quiz Score	37.6496		Ave. Pre-Quiz Score		2.5	5	2.57143	1.33333	1.75	2		4						5.33333					4				1.71429						4.66667							2.66667	5	3.5
	Pooled Std Deviation of Delta A&B	11.5846		Group B Sigma	1.16241		Ave. Post-Quiz Score	51.2335		Ave. Post-Quiz Score		5.25	8	3.42857	1.33333	3.75	2.57143		6.66667						7.33333					4				3.71429						7.33333							4.66667	6	6
	Cohen's Number d	0.567718		T-Test, 1-Tail, Pre vs Post Quiz	2.04293e-05		Delta Score, Uplift	13.5838				2.75	3	0.857143	0	2	0.571429		2.66667						2					0				2						2.66667							2	1	2.5
				Hake's Normalized Gain g	0.217863		Post-Quiz Scores Std. Dev.	15.9251
							Std. Dev. of No. of Quiz Taken	37.3617
												GRADE 1										GRADE 2												GRADE 3													GRADE 4
	Grade 1-6, Group A vs B Statistics, w/o 2&3			Grade 1-6, Group A, Statistics			Grade 1-6, Group A	Ave. of Ave.		Group R/W Students		01A01	01A02	01A03	01A04	01A05	01A06	01A07	01A08	01A09		02A01	02A02	02A03	02A04	02A05	02A06	02A07	02A08	02A09	02A10	02A11		03A01	03A02	03A03	03A04	03A05	03A06	03A07	03A08	03A09	03A10	03A11			04A01	04A02	04A03
	T-Test, 1-Tail, A-Pre vs B-Pre	0.459091		Ave. Delta Score Uplift	6.62032		Quiz Modules Taken, Min 3	8.33333		Quiz Modules Taken, Min 3		4	5	10	14	14	7	6	6																												6		6
	T-Test, 1-Tail, A-Post vs B-Post	0.0252229		Pre-Quiz Scores Std. Deviation	10.1841		Ave. Pre-Quiz Score	37.2048		Ave. Pre-Quiz Score		2.5	2.4	3	1.57143	2.85714	2.57143	4	3.66667																												5.33333		5.66667
	T-Test, 1-Tail, A-Delta vs B-Delta	0.00675532		Group A Sigma	0.650066		Ave. Post-Quiz Score	43.8252		Ave. Post-Quiz Score		3	2.8	3.2	3.28571	3.85714	4.28571	4.33333	5																												4		6
	Total Valid Takers Group A	36		T-Test, 1-Tail, Pre vs Post Quiz	0.0111858		Delta Score, Uplift	6.62032				0.5	0.4	0.2	1.71429	1	1.71429	0.333333	1.33333																												-1.33333		0.333333
	Total Valid Quizzes Group A	300		Hake's Normalized Gain g	0.105427		Post-Quiz Scores Std. Dev.	13.619
	Total Valid Takers Group B	36					Std. Dev. of No. of Quiz Taken	47.2682				GRADE 1										GRADE 2												GRADE 3													GRADE 4
	Total Valid Quizzes Group B	271		Grade 1-6, Group B, Statistics			Grade 1-6, Group B	Ave. of Ave.		Group AI Students		01B01	01B02	01B03	01B04	01B05	01B06	01B07	01B08			02B01	02B02	02B03	02B04	02B05	02B06	02B07	02B08	02B09	02B10			03B01	03B02	03B03	03B04	03B05	03B06	03B07	03B08	03B09	03B10	03B11	03B12		04B01	04B02	04B03
	Std Deviation of Delta Scores A	10.9511		Ave. Delta Score Uplift	13.2413		Quiz Modules Taken, Min 3	7.52778		Quiz Modules Taken, Min 3		8	4	7	6	8	7		3																												6	6	4
	Std Deviation of Delta Scores B	11.2164		Pre-Quiz Scores Std. Deviation	11.4284		Ave. Pre-Quiz Score	37.4679		Ave. Pre-Quiz Score		2.5	5	2.57143	1.33333	1.75	2		4																												2.66667	5	3.5
	Pooled Std Deviation of Delta A&B	11.0845		Group B Sigma	1.15863		Ave. Post-Quiz Score	50.7091		Ave. Post-Quiz Score		5.25	8	3.42857	1.33333	3.75	2.57143		6.66667																												4.66667	6	6
	Cohen's Number d	0.590293		T-Test, 1-Tail, Pre vs Post Quiz	5.51476e-05		Delta Score, Uplift	13.2413				2.75	3	0.857143	0	2	0.571429		2.66667																												2	1	2.5
				Hake's Normalized Gain g	0.211752		Post-Quiz Scores Std. Dev.	15.6564
							Std. Dev. of No. of Quiz Taken	37.6059
												GRADE 7												GRADE 8															GRADE 9
	Grade 7-10, Group A vs B Statistics			Grade 7-10, Group A, Statistics			Grade 7-10, Group A	Ave. of Ave.		Group R/W Students		07A01	07A02	07A03	07A04	07A05	07A06	07A07	07A08	07A09	07A10	07A11		08A01	08A02	08A03	08A04	08A05	08A06	08A07	08A08	08A09	08A10	08A11	08A12	08A13			09A01	09A02	09A03	09A04	09A05	09A06	09A07	09A08	09A09	09A10	09A11
	T-Test, 1-Tail, A-Pre vs B-Pre	0.413406		Ave. Delta Score Uplift	8.54004		Quiz Modules Taken, Min 3	8.85106		Quiz Modules Taken, Min 3		9	5	5	8	6			3	4	10	8		11	14	8			9	7	8	11	9	3	13	11				12	3	14	11	5	16	16	16	7	12
	T-Test, 1-Tail, A-Post vs B-Post	0.1684		Pre-Quiz Scores Std. Deviation	10.8542		Ave. Pre-Quiz Score	45.3995		Ave. Pre-Quiz Score		5.55556	5.6	4.8	3.75	6			6	2.5	6	1.5		3.81818	3.71429	5			4.22222	4	6	4.90909	3.11111	6	4.15385	5.27273				3.83333	5.33333	4.85714	4	3.6	4.375	3.875	4.25	4.57143	3.16667
	T-Test, 1-Tail, A-Delta vs B-Delta	0.137436		Group A Sigma	0.7868		Ave. Post-Quiz Score	53.9395		Ave. Post-Quiz Score		5.77778	6.4	9.2	3.25	7.33333			8	3.5	7.2	2.75		5.27273	4.85714	6.5			5.33333	5.71429	8.25	4.36364	2	8	4.07692	6.5				2.83333	6.66667	5.71429	4.72727	4.4	4.25	3.25	4.375	3.71429	3.16667
	Total Valid Takers Group A	47		T-Test, 1-Tail, Pre vs Post Quiz	0.00378352		Delta Score, Uplift	8.54004				0.222222	0.8	4.4	-0.5	1.33333			2	1	1.2	1.25		1.45455	1.14286	1.5			1.11111	1.71429	2.25	-0.545455	-1.11111	2	-0.0769231	1.22727				-1	1.33333	0.857143	0.727273	0.8	-0.125	-0.625	0.125	-0.857143	0
	Total Valid Quizzes Group A	416		Hake's Normalized Gain g	0.15641		Post-Quiz Scores Std. Dev.	18.4867
	Total Valid Takers Group B	40					Std. Dev. of No. of Quiz Taken	43.438				GRADE 7												GRADE 8															GRADE 9
	Total Valid Quizzes Group B	313		Grade 7-10, Group B, Statistics			Grade 7-10, Group B	Ave. of Ave.		Group AI Students		07B01	07B02	07B03	07B04	07B05	07B06	07B07	07B08	07B09	07B10			08B01	08B02	08B03	08B04	08B05	08B06	08B07	08B08	08B09	08B10	08B11	08B12	08B13	08B14		09B01	09B02	09B03	09B04	09B05	09B06	09B07	09B08	09B09	09B10	09B11
	Std Deviation of Delta Scores A	13.45		Ave. Delta Score Uplift	11.6231		Quiz Modules Taken, Min 3	7.825		Quiz Modules Taken, Min 3					6	5	3		5	7	8			6	7	5		16	15	14	17	9	8		5	11	10			14		4		9	7	4	7	5	16
	Std Deviation of Delta Scores B	12.541		Pre-Quiz Scores Std. Deviation	10.9439		Ave. Pre-Quiz Score	45.9139		Ave. Pre-Quiz Score					7	6	3.33333		6.8	5.14286	4.5			5	4	5.2		3.5	3.86667	4.85714	3.64706	4	4.25		4.4	4.36364	5.2			2.85714		3.5		4.88889	4.85714	5.5	6.57143	2	4
	Pooled Std Deviation of Delta A&B	13.0408		Group B Sigma	1.06206		Ave. Post-Quiz Score	57.537		Ave. Post-Quiz Score					7	8.4	6		6	5.14286	4.75			7.33333	5.14286	7.2		3.40625	5.06667	4.85714	3.11765	6.33333	5		4.8	5.45455	5.6			2		3.5		7.11111	5.14286	8.5	8.28571	4.4	5.5
	Cohen's Number d	0.245838		T-Test, 1-Tail, Pre vs Post Quiz	0.000132221		Delta Score, Uplift	11.6231							0	2.4	2.66667		-0.8	0	0.25			2.33333	1.14286	2		-0.09375	1.2	0	-0.529412	2.33333	0.75		0.4	1.09091	0.4			-0.857143		0		2.22222	0.285714	3	1.71429	2.4	1.5
				Hake's Normalized Gain g	0.2149		Post-Quiz Scores Std. Dev.	15.8152
							Std. Dev. of No. of Quiz Taken	40.1208
												GRADE 1
	Grade 1, Group A vs B Statistics			Grade 1, Group A, Statistics			Grade 1, Group A	Ave. of Ave.		Group R/W Students		01A01	01A02	01A03	01A04	01A05	01A06	01A07	01A08	01A09
	T-Test, 1-Tail, A-Pre vs B-Pre	0.439448		Ave. Delta Score Uplift	8.99405		Quiz Modules Taken, Min 3	8.25		Quiz Modules Taken, Min 3		4	5	10	14	14	7	6	6
	T-Test, 1-Tail, A-Post vs B-Post	0.216233		Pre-Quiz Scores Std. Deviation	7.59938		Ave. Pre-Quiz Score	28.2083		Ave. Pre-Quiz Score		2.5	2.4	3	1.57143	2.85714	2.57143	4	3.66667
	T-Test, 1-Tail, A-Delta vs B-Delta	0.0632003		Group A Sigma	1.18352		Ave. Post-Quiz Score	37.2024		Ave. Post-Quiz Score		3	2.8	3.2	3.28571	3.85714	4.28571	4.33333	5
	Total Valid Takers Group A	8		T-Test, 1-Tail, Pre vs Post Quiz	0.0170603		Delta Score, Uplift	8.99405				0.5	0.4	0.2	1.71429	1	1.71429	0.333333	1.33333
	Total Valid Quizzes Group A	66		Hake's Normalized Gain g	0.12528		Post-Quiz Scores Std. Dev.	7.72493
	Total Valid Takers Group B	7					Std. Dev. of No. of Quiz Taken	39.5511				GRADE 1
	Total Valid Quizzes Group B	43		Grade 1, Group B, Statistics			Grade 1, Group B	Ave. of Ave.		Group AI Students		01B01	01B02	01B03	01B04	01B05	01B06	01B07	01B08
	Std Deviation of Delta Scores A	6.26214		Ave. Delta Score Uplift	16.9218		Quiz Modules Taken, Min 3	6.14286		Quiz Modules Taken, Min 3		8	4	7	6	8	7		3
	Std Deviation of Delta Scores B	12.0351		Pre-Quiz Scores Std. Deviation	13.0942		Ave. Pre-Quiz Score	27.3639		Ave. Pre-Quiz Score		2.5	5	2.57143	1.33333	1.75	2		4
	Pooled Std Deviation of Delta A&B	9.37903		Group B Sigma	1.29231		Ave. Post-Quiz Score	44.2857		Ave. Post-Quiz Score		5.25	8	3.42857	1.33333	3.75	2.57143		6.66667
	Cohen's Number d	0.658717		T-Test, 1-Tail, Pre vs Post Quiz	0.0605697		Delta Score, Uplift	16.9218				2.75	3	0.857143	0	2	0.571429		2.66667
				Hake's Normalized Gain g	0.232967		Post-Quiz Scores Std. Dev.	23.4268
							Std. Dev. of No. of Quiz Taken	19.518
												GRADE 2
	Grade 2, Group A vs B Statistics			Grade 2, Group A, Statistics			Grade 2, Group A	Ave. of Ave.		Group R/W Students		02A01	02A02	02A03	02A04	02A05	02A06	02A07	02A08	02A09	02A10	02A11
	T-Test, 1-Tail, A-Pre vs B-Pre	#DIV/0!		Ave. Delta Score Uplift	16.6667		Quiz Modules Taken, Min 3	6		Quiz Modules Taken, Min 3												6
	T-Test, 1-Tail, A-Post vs B-Post	#DIV/0!		Pre-Quiz Scores Std. Deviation	#DIV/0!		Ave. Pre-Quiz Score	33.3333		Ave. Pre-Quiz Score												3.33333
	T-Test, 1-Tail, A-Delta vs B-Delta	#DIV/0!		Group A Sigma	#DIV/0!		Ave. Post-Quiz Score	50		Ave. Post-Quiz Score												5
	Total Valid Takers Group A	1		T-Test, 1-Tail, Pre vs Post Quiz	#DIV/0!		Delta Score, Uplift	16.6667														1.66667
	Total Valid Quizzes Group A	6		Hake's Normalized Gain g	0.25		Post-Quiz Scores Std. Dev.	#DIV/0!
	Total Valid Takers Group B	2					Std. Dev. of No. of Quiz Taken	#DIV/0!				GRADE 2
	Total Valid Quizzes Group B	7		Grade 2, Group B, Statistics			Grade 2, Group B	Ave. of Ave.		Group AI Students		02B01	02B02	02B03	02B04	02B05	02B06	02B07	02B08	02B09	02B10
	Std Deviation of Delta Scores A	#DIV/0!		Ave. Delta Score Uplift	10		Quiz Modules Taken, Min 3	3.5		Quiz Modules Taken, Min 3					3					4
	Std Deviation of Delta Scores B	14.1421		Pre-Quiz Scores Std. Deviation	9.42809		Ave. Pre-Quiz Score	46.6667		Ave. Pre-Quiz Score					5.33333					4
	Pooled Std Deviation of Delta A&B	#DIV/0!		Group B Sigma	1.06066		Ave. Post-Quiz Score	56.6667		Ave. Post-Quiz Score					7.33333					4
	Cohen's Number d	-0.471405		T-Test, 1-Tail, Pre vs Post Quiz	0.316746		Delta Score, Uplift	10							2					0
				Hake's Normalized Gain g	0.1875		Post-Quiz Scores Std. Dev.	23.5702
							Std. Dev. of No. of Quiz Taken	7.07107
												GRADE 3
	Grade 3, Group A vs B Statistics			Grade 3, Group A, Statistics			Grade 3, Group A	Ave. of Ave.		Group R/W Students		03A01	03A02	03A03	03A04	03A05	03A06	03A07	03A08	03A09	03A10	03A11
	T-Test, 1-Tail, A-Pre vs B-Pre	0.0289985		Ave. Delta Score Uplift	9.5		Quiz Modules Taken, Min 3	4.16667		Quiz Modules Taken, Min 3			4		3	3	3	7			5
	T-Test, 1-Tail, A-Post vs B-Post	0.324824		Pre-Quiz Scores Std. Deviation	7.69054		Ave. Pre-Quiz Score	52.9841		Ave. Pre-Quiz Score			4		5.33333	6	6	4.85714			5.6
	T-Test, 1-Tail, A-Delta vs B-Delta	0.177578		Group A Sigma	1.23528		Ave. Post-Quiz Score	62.4841		Ave. Post-Quiz Score			6.5		4	8.66667	4.66667	6.85714			6.8
	Total Valid Takers Group A	6		T-Test, 1-Tail, Pre vs Post Quiz	0.118437		Delta Score, Uplift	9.5					2.5		-1.33333	2.66667	-1.33333	2			1.2
	Total Valid Quizzes Group A	25		Hake's Normalized Gain g	0.202059		Post-Quiz Scores Std. Dev.	16.8186
	Total Valid Takers Group B	2					Std. Dev. of No. of Quiz Taken	16.0208				GRADE 3
	Total Valid Quizzes Group B	10		Grade 3, Group B, Statistics			Grade 3, Group B	Ave. of Ave.		Group AI Students		03B01	03B02	03B03	03B04	03B05	03B06	03B07	03B08	03B09	03B10	03B11	03B12
	Std Deviation of Delta Scores A	18.4074		Ave. Delta Score Uplift	23.3333		Quiz Modules Taken, Min 3	5		Quiz Modules Taken, Min 3		7						3
	Std Deviation of Delta Scores B	4.71405		Pre-Quiz Scores Std. Deviation	20.8765		Ave. Pre-Quiz Score	31.9048		Ave. Pre-Quiz Score		1.71429						4.66667
	Pooled Std Deviation of Delta A&B	16.9135		Group B Sigma	1.11768		Ave. Post-Quiz Score	55.2381		Ave. Post-Quiz Score		3.71429						7.33333
	Cohen's Number d	2.93449		T-Test, 1-Tail, Pre vs Post Quiz	0.211485		Delta Score, Uplift	23.3333				2						2.66667
				Hake's Normalized Gain g	0.342657		Post-Quiz Scores Std. Dev.	25.5905
							Std. Dev. of No. of Quiz Taken	28.2843
												GRADE 4
	Grade 4, Group A vs B Statistics			Grade 4, Group A, Statistics			Grade 4, Group A	Ave. of Ave.		Group R/W Students		04A01	04A02	04A03	04A04	04A05	04A06	04A07	04A08	04A09	04A10
	T-Test, 1-Tail, A-Pre vs B-Pre	0.189572		Ave. Delta Score Uplift	5.78923		Quiz Modules Taken, Min 3	7.875		Quiz Modules Taken, Min 3		6		6		7	15	5	8	5	11
	T-Test, 1-Tail, A-Post vs B-Post	0.157963		Pre-Quiz Scores Std. Deviation	8.91739		Ave. Pre-Quiz Score	44.1269		Ave. Pre-Quiz Score		5.33333		5.66667		4	2.93333	4.8	4.75	4	3.81818
	T-Test, 1-Tail, A-Delta vs B-Delta	0.0611715		Group A Sigma	0.649207		Ave. Post-Quiz Score	49.9161		Ave. Post-Quiz Score		4		6		6.85714	3.86667	6	3.5	4.8	4.90909
	Total Valid Takers Group A	8		T-Test, 1-Tail, Pre vs Post Quiz	0.145586		Delta Score, Uplift	5.78923				-1.33333		0.333333		2.85714	0.933333	1.2	-1.25	0.8	1.09091
	Total Valid Quizzes Group A	63		Hake's Normalized Gain g	0.103614		Post-Quiz Scores Std. Dev.	11.9709
	Total Valid Takers Group B	9					Std. Dev. of No. of Quiz Taken	34.821				GRADE 4
	Total Valid Quizzes Group B	60		Grade 4, Group B, Statistics			Grade 4, Group B	Ave. of Ave.		Group AI Students		04B01	04B02	04B03	04B04	04B05	04B06	04B07	04B08	04B09	04B10
	Std Deviation of Delta Scores A	13.6668		Ave. Delta Score Uplift	15.5926		Quiz Modules Taken, Min 3	6.66667		Quiz Modules Taken, Min 3		6	6	4	6	12	5	6		12	3
	Std Deviation of Delta Scores B	11.0098		Pre-Quiz Scores Std. Deviation	12.0747		Ave. Pre-Quiz Score	39.4074		Ave. Pre-Quiz Score		2.66667	5	3.5	5.33333	4.66667	4.8	4.66667		2.83333	2
	Pooled Std Deviation of Delta A&B	12.3212		Group B Sigma	1.29134		Ave. Post-Quiz Score	55		Ave. Post-Quiz Score		4.66667	6	6	6.33333	5.33333	6	5.33333		3.83333	6
	Cohen's Number d	0.89042		T-Test, 1-Tail, Pre vs Post Quiz	0.00267557		Delta Score, Uplift	15.5926				2	1	2.5	1	0.666667	1.2	0.666667		1	4
				Hake's Normalized Gain g	0.257335		Post-Quiz Scores Std. Dev.	8.07947
							Std. Dev. of No. of Quiz Taken	32.0156
												GRADE 5
	Grade 5, Group A vs B Statistics			Grade 5, Group A, Statistics			Grade 5, Group A	Ave. of Ave.		Group R/W Students		05A01	05A02	05A03	05A04	05A05	05A06	05A07	05A08	05A09	05A10	05A11	05A12	05A13
	T-Test, 1-Tail, A-Pre vs B-Pre	0.338064		Ave. Delta Score Uplift	8.67901		Quiz Modules Taken, Min 3	9.92308		Quiz Modules Taken, Min 3		14	5	13	22	6	10	6	7	6	6	6	23	5
	T-Test, 1-Tail, A-Post vs B-Post	0.291333		Pre-Quiz Scores Std. Deviation	8.79422		Ave. Pre-Quiz Score	36.8023		Ave. Pre-Quiz Score		3	2	3.84615	2.90909	2.66667	3.8	4.66667	5.14286	4.66667	3.66667	4	3.47826	4
	T-Test, 1-Tail, A-Delta vs B-Delta	0.3334		Group A Sigma	0.986899		Ave. Post-Quiz Score	45.4813		Ave. Post-Quiz Score		2.42857	3.6	5.38462	3.63636	2.33333	3.8	5	7.14286	4.66667	3.66667	6.66667	4	6.8
	Total Valid Takers Group A	13		T-Test, 1-Tail, Pre vs Post Quiz	0.048223		Delta Score, Uplift	8.67901				-0.571429	1.6	1.53846	0.727273	-0.333333	0	0.333333	2	0	0	2.66667	0.521739	2.8
	Total Valid Quizzes Group A	129		Hake's Normalized Gain g	0.137331		Post-Quiz Scores Std. Dev.	15.8048
	Total Valid Takers Group B	12					Std. Dev. of No. of Quiz Taken	63.0425				GRADE 5
	Total Valid Quizzes Group B	123		Grade 5, Group B, Statistics			Grade 5, Group B	Ave. of Ave.		Group AI Students		05B01	05B02	05B03	05B04	05B05	05B06	05B07	05B08	05B09	05B10	05B11	05B12
	Std Deviation of Delta Scores A	11.3415		Ave. Delta Score Uplift	10.6685		Quiz Modules Taken, Min 3	10.25		Quiz Modules Taken, Min 3		7	8	15	10	19	11	3	8	7	15	9	11
	Std Deviation of Delta Scores B	11.4524		Pre-Quiz Scores Std. Deviation	8.70868		Ave. Pre-Quiz Score	38.2851		Ave. Pre-Quiz Score		3.14286	3.75	3.2	3.8	3.57895	4.36364	4.66667	3.5	4.85714	2.8	5.55556	2.72727
	Pooled Std Deviation of Delta A&B	11.3947		Group B Sigma	1.22504		Ave. Post-Quiz Score	48.9535		Ave. Post-Quiz Score		4.28571	4.25	3.46667	5.4	3.26316	5.27273	8	6.75	5.14286	3.6	6.22222	3.09091
	Cohen's Number d	0.173716		T-Test, 1-Tail, Pre vs Post Quiz	0.0237085		Delta Score, Uplift	10.6685				1.14286	0.5	0.266667	1.6	-0.315789	0.909091	3.33333	3.25	0.285714	0.8	0.666667	0.363636
				Hake's Normalized Gain g	0.172867		Post-Quiz Scores Std. Dev.	15.2925
							Std. Dev. of No. of Quiz Taken	43.5107
												GRADE 6
	Grade 6, Group A vs B Statistics			Grade 6, Group A, Statistics			Grade 6, Group A	Ave. of Ave.		Group R/W Students		06A01	06A02	06A03	06A04	06A05	06A06	06A07	06A08	06A09	06A10	06A11	06A12
	T-Test, 1-Tail, A-Pre vs B-Pre	0.305652		Ave. Delta Score Uplift	1.03401		Quiz Modules Taken, Min 3	6		Quiz Modules Taken, Min 3		6					4	3		10	4	8	7
	T-Test, 1-Tail, A-Post vs B-Post	0.0626888		Pre-Quiz Scores Std. Deviation	10.3288		Ave. Pre-Quiz Score	40.3231		Ave. Pre-Quiz Score		4.33333					4	4		4	6	2.75	3.14286
	T-Test, 1-Tail, A-Delta vs B-Delta	0.050142		Group A Sigma	0.10011		Ave. Post-Quiz Score	41.3571		Ave. Post-Quiz Score		6					4	2		4.2	6	2.75	4
	Total Valid Takers Group A	7		T-Test, 1-Tail, Pre vs Post Quiz	0.441507		Delta Score, Uplift	1.03401				1.66667					0	-2		0.2	0	0	0.857143
	Total Valid Quizzes Group A	42		Hake's Normalized Gain g	0.0173269		Post-Quiz Scores Std. Dev.	14.9853
	Total Valid Takers Group B	8					Std. Dev. of No. of Quiz Taken	25.1661				GRADE 6
	Total Valid Quizzes Group B	45		Grade 6, Group B, Statistics			Grade 6, Group B	Ave. of Ave.		Group AI Students		06B01	06B02	06B03	06B04	06B05	06B06	06B07	06B08	06B09	06B10	06B11	06B12
	Std Deviation of Delta Scores A	11.1637		Ave. Delta Score Uplift	11.2348		Quiz Modules Taken, Min 3	5.625		Quiz Modules Taken, Min 3		3		5	5		4	7	11	6		4
	Std Deviation of Delta Scores B	11.1197		Pre-Quiz Scores Std. Deviation	8.85806		Ave. Pre-Quiz Score	42.901		Ave. Pre-Quiz Score		5.33333		3.6	4		3	4.85714	4.36364	3.66667		5.5
	Pooled Std Deviation of Delta A&B	11.14		Group B Sigma	1.26832		Ave. Post-Quiz Score	54.1358		Ave. Post-Quiz Score		8		4.4	6.4		4.5	4.85714	3.81818	4.33333		7
	Cohen's Number d	0.917367		T-Test, 1-Tail, Pre vs Post Quiz	0.0458362		Delta Score, Uplift	11.2348				2.66667		0.8	2.4		1.5	0	-0.545455	0.666667		1.5
				Hake's Normalized Gain g	0.196761		Post-Quiz Scores Std. Dev.	15.1484
							Std. Dev. of No. of Quiz Taken	25.0357
												GRADE 7
	Grade 7, Group A vs B Statistics			Grade 7, Group A, Statistics			Grade 7, Group A	Ave. of Ave.		Group R/W Students		07A01	07A02	07A03	07A04	07A05	07A06	07A07	07A08	07A09	07A10	07A11
	T-Test, 1-Tail, A-Pre vs B-Pre	0.169313		Ave. Delta Score Uplift	13.0062		Quiz Modules Taken, Min 3	6.44444		Quiz Modules Taken, Min 3		9	5	5	8	6			3	4	10	8
	T-Test, 1-Tail, A-Post vs B-Post	0.395824		Pre-Quiz Scores Std. Deviation	16.7948		Ave. Pre-Quiz Score	46.3395		Ave. Pre-Quiz Score		5.55556	5.6	4.8	3.75	6			6	2.5	6	1.5
	T-Test, 1-Tail, A-Delta vs B-Delta	0.23356		Group A Sigma	0.774417		Ave. Post-Quiz Score	59.3457		Ave. Post-Quiz Score		5.77778	6.4	9.2	3.25	7.33333			8	3.5	7.2	2.75
	Total Valid Takers Group A	9		T-Test, 1-Tail, Pre vs Post Quiz	0.0942807		Delta Score, Uplift	13.0062				0.222222	0.8	4.4	-0.5	1.33333			2	1	1.2	1.25
	Total Valid Quizzes Group A	58		Hake's Normalized Gain g	0.242379		Post-Quiz Scores Std. Dev.	22.9139
	Total Valid Takers Group B	6					Std. Dev. of No. of Quiz Taken	24.037				GRADE 7
	Total Valid Quizzes Group B	34		Grade 7, Group B, Statistics			Grade 7, Group B	Ave. of Ave.		Group AI Students		07B01	07B02	07B03	07B04	07B05	07B06	07B07	07B08	07B09	07B10
	Std Deviation of Delta Scores A	13.6268		Ave. Delta Score Uplift	7.52778		Quiz Modules Taken, Min 3	5.66667		Quiz Modules Taken, Min 3					6	5	3		5	7	8
	Std Deviation of Delta Scores B	14.2643		Pre-Quiz Scores Std. Deviation	14.1447		Ave. Pre-Quiz Score	54.627		Ave. Pre-Quiz Score					7	6	3.33333		6.8	5.14286	4.5
	Pooled Std Deviation of Delta A&B	13.8755		Group B Sigma	0.532197		Ave. Post-Quiz Score	62.1548		Ave. Post-Quiz Score					7	8.4	6		6	5.14286	4.75
	Cohen's Number d	-0.384062		T-Test, 1-Tail, Pre vs Post Quiz	0.18192		Delta Score, Uplift	7.52778							0	2.4	2.66667		-0.8	0	0.25
				Hake's Normalized Gain g	0.165909		Post-Quiz Scores Std. Dev.	13.2504
							Std. Dev. of No. of Quiz Taken	17.5119
												GRADE 8
	Grade 8, Group A vs B Statistics			Grade 8, Group A, Statistics			Grade 8, Group A	Ave. of Ave.		Group R/W Students		08A01	08A02	08A03	08A04	08A05	08A06	08A07	08A08	08A09	08A10	08A11	08A12	08A13
	T-Test, 1-Tail, A-Pre vs B-Pre	0.266035		Ave. Delta Score Uplift	9.69689		Quiz Modules Taken, Min 3	9.45455		Quiz Modules Taken, Min 3		11	14	8			9	7	8	11	9	3	13	11
	T-Test, 1-Tail, A-Post vs B-Post	0.346382		Pre-Quiz Scores Std. Deviation	9.44878		Ave. Pre-Quiz Score	45.6377		Ave. Pre-Quiz Score		3.81818	3.71429	5			4.22222	4	6	4.90909	3.11111	6	4.15385	5.27273
	T-Test, 1-Tail, A-Delta vs B-Delta	0.45272		Group A Sigma	1.02626		Ave. Post-Quiz Score	55.3346		Ave. Post-Quiz Score		5.27273	4.85714	6.5			5.33333	5.71429	8.25	4.36364	2	8	4.07692	6.5
	Total Valid Takers Group A	11		T-Test, 1-Tail, Pre vs Post Quiz	0.0635836		Delta Score, Uplift	9.69689				1.45455	1.14286	1.5			1.11111	1.71429	2.25	-0.545455	-1.11111	2	-0.0769231	1.22727
	Total Valid Quizzes Group A	104		Hake's Normalized Gain g	0.178375		Post-Quiz Scores Std. Dev.	17.862
	Total Valid Takers Group B	12					Std. Dev. of No. of Quiz Taken	30.4512				GRADE 8
	Total Valid Quizzes Group B	123		Grade 8, Group B, Statistics			Grade 8, Group B	Ave. of Ave.		Group AI Students		08B01	08B02	08B03	08B04	08B05	08B06	08B07	08B08	08B09	08B10	08B11	08B12	08B13	08B14
	Std Deviation of Delta Scores A	10.7743		Ave. Delta Score Uplift	9.18939		Quiz Modules Taken, Min 3	10.25		Quiz Modules Taken, Min 3		6	7	5		16	15	14	17	9	8		5	11	10
	Std Deviation of Delta Scores B	9.46922		Pre-Quiz Scores Std. Deviation	5.90225		Ave. Pre-Quiz Score	43.5704		Ave. Pre-Quiz Score		5	4	5.2		3.5	3.86667	4.85714	3.64706	4	4.25		4.4	4.36364	5.2
	Pooled Std Deviation of Delta A&B	10.1117		Group B Sigma	1.55693		Ave. Post-Quiz Score	52.7598		Ave. Post-Quiz Score		7.33333	5.14286	7.2		3.40625	5.06667	4.85714	3.11765	6.33333	5		4.8	5.45455	5.6
	Cohen's Number d	-0.0535949		T-Test, 1-Tail, Pre vs Post Quiz	0.0168304		Delta Score, Uplift	9.18939				2.33333	1.14286	2		-0.09375	1.2	0	-0.529412	2.33333	0.75		0.4	1.09091	0.4
				Hake's Normalized Gain g	0.162847		Post-Quiz Scores Std. Dev.	12.7505
							Std. Dev. of No. of Quiz Taken	43.3013
												GRADE 9
	Grade 9, Group A vs B Statistics			Grade 9, Group A, Statistics			Grade 9, Group A	Ave. of Ave.		Group R/W Students		09A01	09A02	09A03	09A04	09A05	09A06	09A07	09A08	09A09	09A10	09A11	09A12	09A13	09A14	09A15	09A16	09A17	09A18	09A19
	T-Test, 1-Tail, A-Pre vs B-Pre	0.345188		Ave. Delta Score Uplift	-0.863097		Quiz Modules Taken, Min 3	11.3529		Quiz Modules Taken, Min 3			12	3	14	11	5	16	16	16	7	12	18	14	16	17	6	5		5
	T-Test, 1-Tail, A-Post vs B-Post	0.0414263		Pre-Quiz Scores Std. Deviation	9.50381		Ave. Pre-Quiz Score	44.9938		Ave. Pre-Quiz Score			3.83333	5.33333	4.85714	4	3.6	4.375	3.875	4.25	4.57143	3.16667	6	4.42857	3.25	3.88235	6.66667	5.2		5.2
	T-Test, 1-Tail, A-Delta vs B-Delta	0.00203738		Group A Sigma	-0.0908159		Ave. Post-Quiz Score	44.1307		Ave. Post-Quiz Score			2.83333	6.66667	5.71429	4.72727	4.4	4.25	3.25	4.375	3.71429	3.16667	4.66667	5.14286	3.625	2.82353	5.66667	4		6
	Total Valid Takers Group A	17		T-Test, 1-Tail, Pre vs Post Quiz	0.40602		Delta Score, Uplift	-0.863097					-1	1.33333	0.857143	0.727273	0.8	-0.125	-0.625	0.125	-0.857143	0	-1.33333	0.714286	0.375	-1.05882	-1	-1.2		0.8
	Total Valid Quizzes Group A	193		Hake's Normalized Gain g	-0.0156909		Post-Quiz Scores Std. Dev.	11.4001
	Total Valid Takers Group B	12					Std. Dev. of No. of Quiz Taken	50.983				GRADE 9
	Total Valid Quizzes Group B	107		Grade 9, Group B, Statistics			Grade 9, Group B	Ave. of Ave.		Group AI Students		09B01	09B02	09B03	09B04	09B05	09B06	09B07	09B08	09B09	09B10	09B11	09B12	09B13	09B14	09B15	09B16	09B17	09B18
	Std Deviation of Delta Scores A	8.78245		Ave. Delta Score Uplift	10.8222		Quiz Modules Taken, Min 3	8.91667		Quiz Modules Taken, Min 3			14		4		9	7	4	7	5	16	9			14	7	11
	Std Deviation of Delta Scores B	11.2726		Pre-Quiz Scores Std. Deviation	12.2158		Ave. Pre-Quiz Score	43.3706		Ave. Pre-Quiz Score			2.85714		3.5		4.88889	4.85714	5.5	6.57143	2	4	4			4	5.14286	4.72727
	Pooled Std Deviation of Delta A&B	9.87308		Group B Sigma	0.885912		Ave. Post-Quiz Score	54.1928		Ave. Post-Quiz Score			2		3.5		7.11111	5.14286	8.5	8.28571	4.4	5.5	5.11111			4.57143	6	4.90909
	Cohen's Number d	1.0366		T-Test, 1-Tail, Pre vs Post Quiz	0.0537297		Delta Score, Uplift	10.8222					-0.857143		0		2.22222	0.285714	3	1.71429	2.4	1.5	1.11111			0.571429	0.857143	0.181818
				Hake's Normalized Gain g	0.191105		Post-Quiz Scores Std. Dev.	18.7029
							Std. Dev. of No. of Quiz Taken	40.5549
												GRADE 10
	Grade 10, Group A vs B Statistics			Grade 10, Group A, Statistics			Grade 10, Group A	Ave. of Ave.		Group R/W Students		10A01	10A02	10A03	10A04	10A05	10A06	10A07	10A08	10A09	10A10	10A11	10A12	10A13	10A14	10A15	10A16
	T-Test, 1-Tail, A-Pre vs B-Pre	0.36681		Ave. Delta Score Uplift	19.2333		Quiz Modules Taken, Min 3	6.1		Quiz Modules Taken, Min 3			6	6	5	4	7	12			10			4		3	4
	T-Test, 1-Tail, A-Post vs B-Post	0.485015		Pre-Quiz Scores Std. Deviation	9.49724		Ave. Pre-Quiz Score	44.981		Ave. Pre-Quiz Score			5	4.66667	3.6	4.5	5.71429	2.66667			4			4		5.33333	5.5
	T-Test, 1-Tail, A-Delta vs B-Delta	0.423043		Group A Sigma	2.02515		Ave. Post-Quiz Score	64.2143		Ave. Post-Quiz Score			6.66667	8	3.2	8.5	7.71429	4.83333			4.8			4.5		8	8
	Total Valid Takers Group A	10		T-Test, 1-Tail, Pre vs Post Quiz	0.00526731		Delta Score, Uplift	19.2333					1.66667	3.33333	-0.4	4	2	2.16667			0.8			0.5		2.66667	2.5
	Total Valid Quizzes Group A	61		Hake's Normalized Gain g	0.349576		Post-Quiz Scores Std. Dev.	19.0754
	Total Valid Takers Group B	10					Std. Dev. of No. of Quiz Taken	28.8483				GRADE 10
	Total Valid Quizzes Group B	49		Grade 10, Group B, Statistics			Grade 10, Group B	Ave. of Ave.		Group AI Students		10B01	10B02	10B03	10B04	10B05	10B06	10B07	10B08	10B09	10B10	10B11	10B12	10B13	10B14	10B15	10B16	10B17
	Std Deviation of Delta Scores A	13.3343		Ave. Delta Score Uplift	17.9619		Quiz Modules Taken, Min 3	4.9		Quiz Modules Taken, Min 3		5			5			7	5	4	3			6		3	8	3
	Std Deviation of Delta Scores B	15.46		Pre-Quiz Scores Std. Deviation	10.7646		Ave. Pre-Quiz Score	46.55		Ave. Pre-Quiz Score		4.4			3.2			6	5.2	3.5	5.33333			4.33333		5.33333	3.25	6
	Pooled Std Deviation of Delta A&B	14.4364		Group B Sigma	1.66861		Ave. Post-Quiz Score	64.5119		Ave. Post-Quiz Score		8.4			5.6			7.42857	6	7.5	6.66667			3.66667		5.33333	5.25	8.66667
	Cohen's Number d	-0.0822397		T-Test, 1-Tail, Pre vs Post Quiz	0.0039791		Delta Score, Uplift	17.9619				4			2.4			1.42857	0.8	4	1.33333			-0.666667		0	2	2.66667
				Hake's Normalized Gain g	0.336051		Post-Quiz Scores Std. Dev.	15.6993
							Std. Dev. of No. of Quiz Taken	17.2884
[truncated: 91 more columns]

## Sheet: Selected Quiz Level
STATISTICAL ANALYSIS OF DATA - Quiz Level
GRADE 1 TO 10, GROUP A & B
Minimum 5 Students per Group
	Grade 1, Group A vs B, Quiz 37	Value		Grade 1, Group A vs B, Quiz 37	Value
	T-Test, 1-Tail, A-Pre vs B-Pre	0.0470284		Total Valid Quizzes Group A	9
	T-Test, 1-Tail, A-Post vs B-Post	0.0422565		Total Valid Quizzes Group B	7
	T-Test, 1-Tail, A-Delta vs B-Delta	0.35446		Std Deviation of Delta Scores A	20.2759
	Total Valid Takers Group A, Min 5	9		Std Deviation of Delta Scores B	35.9894
	Total Valid Takers Group B, Min 5	7		Pooled Std Deviation of Delta A&B	28.1073
				Cohen's Number d	0.149956
	Grade 1, Group A, Statistics	Value		Grade 1, Group A	Ave.		01A01	01A02	01A03	01A04	01A05	01A06	01A07	01A08	01A09
	Ave. Delta Score Uplift	8.88889		Quiz Modules Taken	1		1	1	1	1	1	1	1	1	1
	Pre-Quiz Scores Std. Deviation	13.3333		Ave. Pre-Quiz Score	15.5556		0	4	0	2	2	0	2	2	2
	Group A Sigma	0.666667		Ave. Post-Quiz Score	24.4444		2	2	4	4	4	2	2	2	0
	T-Test, 1-Tail, Pre vs Post Quiz	0.0882316		Delta Score, Uplift	8.88889		2	-2	4	2	2	2	0	0	-2
	Hake's Normalized Gain g	0.105263		Post-Quiz Scores Std. Dev.	13.3333
	Grade 1, Group B, Statistics	Value		Grade 1, Group B	Ave.		01B01	01B02	01B03	01B04	01B05	01B06	01B07	01B08
	Ave. Delta Score Uplift	14.2857		Quiz Modules Taken	1		1	1	1	1	1	1		1
	Pre-Quiz Scores Std. Deviation	27.6026		Ave. Pre-Quiz Score	34.2857		0	6	2	0	6	4		6
	Group B Sigma	0.517549		Ave. Post-Quiz Score	48.5714		6	10	6	0	2	2		8
	T-Test, 1-Tail, Pre vs Post Quiz	0.211507		Delta Score, Uplift	14.2857		6	4	4	0	-4	-2		2
	Hake's Normalized Gain g	0.217391		Post-Quiz Scores Std. Dev.	36.2531
	Grade 1, Group A vs B, Quiz 38	Value		Grade 1, Group A vs B, Quiz 37	Value
	T-Test, 1-Tail, A-Pre vs B-Pre	0.5		Total Valid Quizzes Group A	7
	T-Test, 1-Tail, A-Post vs B-Post	0.267226		Total Valid Quizzes Group B	7
	T-Test, 1-Tail, A-Delta vs B-Delta	0.322566		Std Deviation of Delta Scores A	32.3669
	Total Valid Takers Group A, Min 5	7		Std Deviation of Delta Scores B	35.4562
	Total Valid Takers Group B, Min 5	7		Pooled Std Deviation of Delta A&B	33.9467
				Cohen's Number d	0.241747
	Grade 1, Group A, Statistics	Value		Grade 1, Group A	Ave.		01A01	01A02	01A03	01A04	01A05	01A06	01A07	01A08	01A09
	Ave. Delta Score Uplift	8.57143		Quiz Modules Taken	1		1		1	1	1	1	1	1
	Pre-Quiz Scores Std. Deviation	17.9947		Ave. Pre-Quiz Score	17.1429		0		4	0	2	0	2	4
	Group A Sigma	0.476331		Ave. Post-Quiz Score	25.7143		0		2	4	4	6	0	2
	T-Test, 1-Tail, Pre vs Post Quiz	0.221754		Delta Score, Uplift	8.57143		0		-2	4	2	6	-2	-2
	Hake's Normalized Gain g	0.103448		Post-Quiz Scores Std. Dev.	22.2539
	Grade 1, Group B, Statistics	Value		Grade 1, Group B	Ave.		01B01	01B02	01B03	01B04	01B05	01B06	01B07	01B08
	Ave. Delta Score Uplift	17.1429		Quiz Modules Taken	1		1	1	1	1	1	1		1
	Pre-Quiz Scores Std. Deviation	21.3809		Ave. Pre-Quiz Score	17.1429		0	2	2	0	2	0		6
	Group B Sigma	0.801784		Ave. Post-Quiz Score	34.2857		4	8	0	4	0	4		4
	T-Test, 1-Tail, Pre vs Post Quiz	0.109168		Delta Score, Uplift	17.1429		4	6	-2	4	-2	4		-2
	Hake's Normalized Gain g	0.206897		Post-Quiz Scores Std. Dev.	27.6026
	Grade 1, Group A vs B, Quiz 41	Value		Grade 1, Group A vs B, Quiz 41	Value
	T-Test, 1-Tail, A-Pre vs B-Pre	0.153879		Total Valid Quizzes Group A	6
	T-Test, 1-Tail, A-Post vs B-Post	0.433315		Total Valid Quizzes Group B	5
	T-Test, 1-Tail, A-Delta vs B-Delta	0.238063		Std Deviation of Delta Scores A	36.697
	Total Valid Takers Group A, Min 5	6		Std Deviation of Delta Scores B	37.4166
	Total Valid Takers Group B, Min 5	5		Pooled Std Deviation of Delta A&B	37.0185
				Cohen's Number d	0.445435
	Grade 1, Group A, Statistics	Value		Grade 1, Group A	Ave.		01A01	01A02	01A03	01A04	01A05	01A06	01A07	01A08	01A09
	Ave. Delta Score Uplift	3.33333		Quiz Modules Taken	1			1		1	1	1	1	1
	Pre-Quiz Scores Std. Deviation	16.3299		Ave. Pre-Quiz Score	33.3333			4		2	2	2	6	4
	Group A Sigma	0.204124		Ave. Post-Quiz Score	36.6667			0		0	4	4	4	10
	T-Test, 1-Tail, Pre vs Post Quiz	0.421497		Delta Score, Uplift	3.33333			-4		-2	2	2	-2	6
	Hake's Normalized Gain g	0.05		Post-Quiz Scores Std. Dev.	36.697
	Grade 1, Group B, Statistics	Value		Grade 1, Group B	Ave.		01B01	01B02	01B03	01B04	01B05	01B06	01B07	01B08
	Ave. Delta Score Uplift	20		Quiz Modules Taken	1		1		1		1	1		1
	Pre-Quiz Scores Std. Deviation	24.4949		Ave. Pre-Quiz Score	20		6		0		2	2		0
	Group B Sigma	0.816497		Ave. Post-Quiz Score	40		4		2		4	2		8
	T-Test, 1-Tail, Pre vs Post Quiz	0.11638		Delta Score, Uplift	20		-2		2		2	0		8
	Hake's Normalized Gain g	0.25		Post-Quiz Scores Std. Dev.	24.4949
	Grade 1, Group A vs B, Quiz Comb	Value		Grade 1, Group A vs B, Quiz Comb	Value
	T-Test, 1-Tail, A-Pre vs B-Pre	0.307428		Total Valid Quizzes Group A	22
	T-Test, 1-Tail, A-Post vs B-Post	0.0642369		Total Valid Quizzes Group B	19
	T-Test, 1-Tail, A-Delta vs B-Delta	0.16509		Std Deviation of Delta Scores A	27.9765
	Total Valid Takers Group A, Min 5	22		Std Deviation of Delta Scores B	34.1651
	Total Valid Takers Group B, Min 5	19		Pooled Std Deviation of Delta A&B	30.9867
				Cohen's Number d	0.280093
	Grade 1, Group A, Statistics	Value		Grade 1, Group A	Ave.		01A01	01A02	01A03	01A04	01A05	01A06	01A07	01A08	01A09		01A01	01A02	01A03	01A04	01A05	01A06	01A07	01A08	01A09		01A01	01A02	01A03	01A04	01A05	01A06	01A07	01A08	01A09
	Ave. Delta Score Uplift	7.27273		Quiz Modules Taken	1		1	1	1	1	1	1	1	1	1		1		1	1	1	1	1	1				1		1	1	1	1	1
	Pre-Quiz Scores Std. Deviation	16.8775		Ave. Pre-Quiz Score	20.9091		0	4	0	2	2	0	2	2	2		0		4	0	2	0	2	4				4		2	2	2	6	4
	Group A Sigma	0.430914		Ave. Post-Quiz Score	28.1818		2	2	4	4	4	2	2	2	0		0		2	4	4	6	0	2				0		0	4	4	4	10
	T-Test, 1-Tail, Pre vs Post Quiz	0.12337		Delta Score, Uplift	7.27273		2	-2	4	2	2	2	0	0	-2		0		-2	4	2	6	-2	-2				-4		-2	2	2	-2	6
	Hake's Normalized Gain g	0.091954		Post-Quiz Scores Std. Dev.	23.6314
	Grade 1, Group B, Statistics	Value		Grade 1, Group B	Ave.		01B01	01B02	01B03	01B04	01B05	01B06	01B07	01B08			01B01	01B02	01B03	01B04	01B05	01B06	01B07	01B08			01B01	01B02	01B03	01B04	01B05	01B06	01B07	01B08
	Ave. Delta Score Uplift	16.8421		Quiz Modules Taken	1		1	1	1	1	1	1		1			1	1	1	1	1	1		1			1		1		1	1		1
	Pre-Quiz Scores Std. Deviation	24.5664		Ave. Pre-Quiz Score	24.2105		0	6	2	0	6	4		6			0	2	2	0	2	0		6			6		0		2	2		0
	Group B Sigma	0.685574		Ave. Post-Quiz Score	41.0526		6	10	6	0	2	2		8			4	8	0	4	0	4		4			4		2		4	2		8
	T-Test, 1-Tail, Pre vs Post Quiz	0.0317052		Delta Score, Uplift	16.8421		6	4	4	0	-4	-2		2			4	6	-2	4	-2	4		-2			-2		2		2	0		8
	Hake's Normalized Gain g	0.222222		Post-Quiz Scores Std. Dev.	29.4193
	Grade 1, Group A vs B, Quiz Comb	Value		Grade 1, Group A vs B, Quiz Comb	Value
	T-Test, 1-Tail, A-Pre vs B-Pre	0.108296		Total Valid Quizzes Group A	16
	T-Test, 1-Tail, A-Post vs B-Post	0.0419731		Total Valid Quizzes Group B	14
	T-Test, 1-Tail, A-Delta vs B-Delta	0.264356		Std Deviation of Delta Scores A	25.2653
	Total Valid Takers Group A, Min 5	16		Std Deviation of Delta Scores B	34.3543
	Total Valid Takers Group B, Min 5	14		Pooled Std Deviation of Delta A&B	29.8316
				Cohen's Number d	0.202719
	Grade 1, Group A, Statistics	Value		Grade 1, Group A	Ave.		01A01	01A02	01A03	01A04	01A05	01A06	01A07	01A08	01A09		01A01	01A02	01A03	01A04	01A05	01A06	01A07	01A08	01A09
	Ave. Delta Score Uplift	8.75		Quiz Modules Taken	1		1	1	1	1	1	1	1	1	1		1		1	1	1	1	1	1
	Pre-Quiz Scores Std. Deviation	15		Ave. Pre-Quiz Score	16.25		0	4	0	2	2	0	2	2	2		0		4	0	2	0	2	4
	Group A Sigma	0.583333		Ave. Post-Quiz Score	25		2	2	4	4	4	2	2	2	0		0		2	4	4	6	0	2
	T-Test, 1-Tail, Pre vs Post Quiz	0.0673485		Delta Score, Uplift	8.75		2	-2	4	2	2	2	0	0	-2		0		-2	4	2	6	-2	-2
	Hake's Normalized Gain g	0.104478		Post-Quiz Scores Std. Dev.	17.127
	Grade 1, Group B, Statistics	Value		Grade 1, Group B	Ave.		01B01	01B02	01B03	01B04	01B05	01B06	01B07	01B08			01B01	01B02	01B03	01B04	01B05	01B06	01B07	01B08
	Ave. Delta Score Uplift	15.7143		Quiz Modules Taken	1		1	1	1	1	1	1		1			1	1	1	1	1	1		1
	Pre-Quiz Scores Std. Deviation	25.3329		Ave. Pre-Quiz Score	25.7143		0	6	2	0	6	4		6			0	2	2	0	2	0		6
	Group B Sigma	0.62031		Ave. Post-Quiz Score	41.4286		6	10	6	0	2	2		8			4	8	0	4	0	4		4
	T-Test, 1-Tail, Pre vs Post Quiz	0.0801558		Delta Score, Uplift	15.7143		6	4	4	0	-4	-2		2			4	6	-2	4	-2	4		-2
	Hake's Normalized Gain g	0.211538		Post-Quiz Scores Std. Dev.	31.8306
	Grade 1, Group A vs B, Quiz Ave	Value		Grade 1, Group A vs B, Quiz Ave	Value
	T-Test, 1-Tail, A-Pre vs B-Pre	0.233636		Total Valid Quizzes Group A	7.33333
	T-Test, 1-Tail, A-Post vs B-Post	0.247599		Total Valid Quizzes Group B	6.33333
	T-Test, 1-Tail, A-Delta vs B-Delta	0.30503		Std Deviation of Delta Scores A	29.7799
	Total Valid Takers Group A, Min 5	7.33333		Std Deviation of Delta Scores B	36.2874
	Total Valid Takers Group B, Min 5	6.33333		Pooled Std Deviation of Delta A&B	33.0242
				Cohen's Number d	0.279046
	Grade 1, Group A, Statistics	Value		Grade 1, Group A	Ave.
	Ave. Delta Score Uplift	6.93122		Quiz Modules Taken	1
	Pre-Quiz Scores Std. Deviation	15.886		Ave. Pre-Quiz Score	22.0106
	Group A Sigma	0.44904		Ave. Post-Quiz Score	28.9418
	T-Test, 1-Tail, Pre vs Post Quiz	0.243828		Delta Score, Uplift	6.93122
	Hake's Normalized Gain g	0.0862371		Post-Quiz Scores Std. Dev.	24.0947
	Grade 1, Group B, Statistics	Value		Grade 1, Group B	Ave.
	Ave. Delta Score Uplift	17.1429		Quiz Modules Taken	1
	Pre-Quiz Scores Std. Deviation	24.4928		Ave. Pre-Quiz Score	23.8095
	Group B Sigma	0.711943		Ave. Post-Quiz Score	40.9524
	T-Test, 1-Tail, Pre vs Post Quiz	0.145685		Delta Score, Uplift	17.1429
	Hake's Normalized Gain g	0.224763		Post-Quiz Scores Std. Dev.	29.4502
	Grade 4, Group A vs B, Quiz 45	Value		Grade 4, Group A vs B, Quiz 45	Value
	T-Test, 1-Tail, A-Pre vs B-Pre	0.0829975		Total Valid Quizzes Group A	8
	T-Test, 1-Tail, A-Post vs B-Post	0.0868852		Total Valid Quizzes Group B	8
	T-Test, 1-Tail, A-Delta vs B-Delta	0.410267		Std Deviation of Delta Scores A	22.5198
	Total Valid Takers Group A, Min 5	8		Std Deviation of Delta Scores B	20.702
	Total Valid Takers Group B, Min 5	8		Pooled Std Deviation of Delta A&B	21.63
				Cohen's Number d	-0.120761
	Grade 4, Group A, Statistics	Value		Grade 4, Group A	Ave.		04A01	04A02	04A03	04A04	04A05	04A06	04A07	04A08	04A09	04A10
	Ave. Delta Score Uplift	17.5		Quiz Modules Taken	1		1		1	1	1	1		1	1	1
	Pre-Quiz Scores Std. Deviation	16.6905		Ave. Pre-Quiz Score	42.5		2		6	2	4	4		4	6	6
	Group A Sigma	1.0485		Ave. Post-Quiz Score	60		6		6	8	6	6		4	6	6
	T-Test, 1-Tail, Pre vs Post Quiz	0.0128006		Delta Score, Uplift	17.5		4		0	6	2	2		0	0	0
	Hake's Normalized Gain g	0.304348		Post-Quiz Scores Std. Dev.	10.6904
	Grade 4, Group B, Statistics	Value		Grade 4, Group B	Ave.		04B01	04B02	04B03	04B04	04B05	04B06	04B07	04B08	04B09	04B10
	Ave. Delta Score Uplift	15		Quiz Modules Taken	1		1		1	1	1	1	1		1	1
	Pre-Quiz Scores Std. Deviation	23.7547		Ave. Pre-Quiz Score	27.5		2		2	6	6	4	0		2	0
	Group B Sigma	0.631454		Ave. Post-Quiz Score	42.5		4		2	8	10	2	0		4	4
	T-Test, 1-Tail, Pre vs Post Quiz	0.156479		Delta Score, Uplift	15		2		0	2	4	-2	0		2	4
	Hake's Normalized Gain g	0.206897		Post-Quiz Scores Std. Dev.	32.8416
	Grade 5, Group A vs B, Quiz 56	Value		Grade 5, Group A vs B, Quiz 56	Value
	T-Test, 1-Tail, A-Pre vs B-Pre	0.204302		Total Valid Quizzes Group A	11
	T-Test, 1-Tail, A-Post vs B-Post	0.392643		Total Valid Quizzes Group B	6
	T-Test, 1-Tail, A-Delta vs B-Delta	0.24962		Std Deviation of Delta Scores A	36.2817
	Total Valid Takers Group A, Min 5	11		Std Deviation of Delta Scores B	27.5681
	Total Valid Takers Group B, Min 5	6		Pooled Std Deviation of Delta A&B	33.629
				Cohen's Number d	-0.428691
	Grade 5, Group A, Statistics	Value		Grade 5, Group A	Ave.		05A01	05A02	05A03	05A04	05A05	05A06	05A07	05A08	05A09	05A10	05A11	05A12	05A13
	Ave. Delta Score Uplift	41.8182		Quiz Modules Taken	1		1	1	1	1	1	1	1			1	1	1	1
	Pre-Quiz Scores Std. Deviation	16.404		Ave. Pre-Quiz Score	29.0909		2	0	4	4	4	6	4			2	2	2	2
	Group A Sigma	2.54927		Ave. Post-Quiz Score	70.9091		2	8	10	8	0	10	6			10	8	8	8
	T-Test, 1-Tail, Pre vs Post Quiz	0.000572587		Delta Score, Uplift	41.8182		0	8	6	4	-4	4	2			8	6	6	6
	Hake's Normalized Gain g	0.589744		Post-Quiz Scores Std. Dev.	32.697
	Grade 5, Group B, Statistics	Value		Grade 5, Group B	Ave.		05B01	05B02	05B03	05B04	05B05	05B06	05B07	05B08	05B09	05B10	05B11	05B12
	Ave. Delta Score Uplift	30		Quiz Modules Taken	1		1	1	1	1	1					1
	Pre-Quiz Scores Std. Deviation	19.6638		Ave. Pre-Quiz Score	36.6667		2	6	2	4	6					2
	Group B Sigma	1.52564		Ave. Post-Quiz Score	66.6667		4	8	4	8	6					10
	T-Test, 1-Tail, Pre vs Post Quiz	0.0201338		Delta Score, Uplift	30		2	2	2	4	0					8
	Hake's Normalized Gain g	0.473684		Post-Quiz Scores Std. Dev.	24.2212
	Grade 5, Group A vs B, Quiz 59	Value		Grade 5, Group A vs B, Quiz 59	Value
	T-Test, 1-Tail, A-Pre vs B-Pre	0.322991		Total Valid Quizzes Group A	9
	T-Test, 1-Tail, A-Post vs B-Post	0.387699		Total Valid Quizzes Group B	9
	T-Test, 1-Tail, A-Delta vs B-Delta	0.327833		Std Deviation of Delta Scores A	40.5518
	Total Valid Takers Group A, Min 5	9		Std Deviation of Delta Scores B	42.4264
	Total Valid Takers Group B, Min 5	9		Pooled Std Deviation of Delta A&B	41.4997
				Cohen's Number d	-0.209513
	Grade 5, Group A, Statistics	Value		Grade 5, Group A	Ave.		05A01	05A02	05A03	05A04	05A05	05A06	05A07	05A08	05A09	05A10	05A11	05A12	05A13
	Ave. Delta Score Uplift	22.2222		Quiz Modules Taken	1		1			1	1	1	1			1	1	1	1
	Pre-Quiz Scores Std. Deviation	20.2759		Ave. Pre-Quiz Score	28.8889		0			4	2	4	4			4	6	0	2
	Group A Sigma	1.09599		Ave. Post-Quiz Score	51.1111		4			4	2	6	6			0	6	10	8
	T-Test, 1-Tail, Pre vs Post Quiz	0.0427073		Delta Score, Uplift	22.2222		4			0	0	2	2			-4	0	10	6
	Hake's Normalized Gain g	0.3125		Post-Quiz Scores Std. Dev.	30.1846
	Grade 5, Group B, Statistics	Value		Grade 5, Group B	Ave.		05B01	05B02	05B03	05B04	05B05	05B06	05B07	05B08	05B09	05B10	05B11	05B12
	Ave. Delta Score Uplift	13.3333		Quiz Modules Taken	1		1	1	1	1	1	1		1		1		1
	Pre-Quiz Scores Std. Deviation	20		Ave. Pre-Quiz Score	33.3333		0	2	4	4	4	6		6		2		2
	Group B Sigma	0.666667		Ave. Post-Quiz Score	46.6667		8	2	2	8	10	2		4		6		0
	T-Test, 1-Tail, Pre vs Post Quiz	0.166097		Delta Score, Uplift	13.3333		8	0	-2	4	6	-4		-2		4		-2
	Hake's Normalized Gain g	0.2		Post-Quiz Scores Std. Dev.	34.641
	Grade 5, Group A vs B, Quiz 60	Value		Grade 5, Group A vs B, Quiz 60	Value
	T-Test, 1-Tail, A-Pre vs B-Pre	0.0677551		Total Valid Quizzes Group A	8
	T-Test, 1-Tail, A-Post vs B-Post	0.42432		Total Valid Quizzes Group B	10
	T-Test, 1-Tail, A-Delta vs B-Delta	0.0735382		Std Deviation of Delta Scores A	26.1861
	Total Valid Takers Group A, Min 5	8		Std Deviation of Delta Scores B	18.3787
	Total Valid Takers Group B, Min 5	10		Pooled Std Deviation of Delta A&B	22.1359
				Cohen's Number d	0.870572
	Grade 5, Group A, Statistics	Value		Grade 5, Group A	Ave.		05A01	05A02	05A03	05A04	05A05	05A06	05A07	05A08	05A09	05A10	05A11	05A12	05A13
	Ave. Delta Score Uplift	0		Quiz Modules Taken	1		1		1	1	1		1			1		1	1
	Pre-Quiz Scores Std. Deviation	18.5164		Ave. Pre-Quiz Score	40		2		6	4	2		6			6		2	4
	Group A Sigma	0		Ave. Post-Quiz Score	40		4		6	2	6		2			4		2	6
	T-Test, 1-Tail, Pre vs Post Quiz	0.5		Delta Score, Uplift	0		2		0	-2	4		-4			-2		0	2
	Hake's Normalized Gain g	0		Post-Quiz Scores Std. Dev.	18.5164
	Grade 5, Group B, Statistics	Value		Grade 5, Group B	Ave.		05B01	05B02	05B03	05B04	05B05	05B06	05B07	05B08	05B09	05B10	05B11	05B12
	Ave. Delta Score Uplift	16		Quiz Modules Taken	1		1	1	1	1	1	1		1		1	1	1
	Pre-Quiz Scores Std. Deviation	18.9737		Ave. Pre-Quiz Score	26		4	2	0	2	4	4		2		2	6	0
	Group B Sigma	0.843274		Ave. Post-Quiz Score	42		4	4	2	2	4	10		4		4	6	2
	T-Test, 1-Tail, Pre vs Post Quiz	0.0575092		Delta Score, Uplift	16		0	2	2	0	0	6		2		2	0	2
	Hake's Normalized Gain g	0.216216		Post-Quiz Scores Std. Dev.	23.9444
	Grade 5, Group A vs B, Quiz 63	Value		Grade 5, Group A vs B, Quiz 63	Value
	T-Test, 1-Tail, A-Pre vs B-Pre	0.140953		Total Valid Quizzes Group A	6
	T-Test, 1-Tail, A-Post vs B-Post	0.148884		Total Valid Quizzes Group B	7
	T-Test, 1-Tail, A-Delta vs B-Delta	0.393327		Std Deviation of Delta Scores A	23.3809
	Total Valid Takers Group A, Min 5	6		Std Deviation of Delta Scores B	20
	Total Valid Takers Group B, Min 5	7		Pooled Std Deviation of Delta A&B	21.6025
				Cohen's Number d	0.166667
	Grade 5, Group A, Statistics	Value		Grade 5, Group A	Ave.		05A01	05A02	05A03	05A04	05A05	05A06	05A07	05A08	05A09	05A10	05A11	05A12	05A13
	Ave. Delta Score Uplift	-23.3333		Quiz Modules Taken	1		1		1			1	1		1			1
	Pre-Quiz Scores Std. Deviation	15.0555		Ave. Pre-Quiz Score	43.3333		4		6			2	4		6			4
	Group A Sigma	-1.54983		Ave. Post-Quiz Score	20		2		0			2	4		4			0
	T-Test, 1-Tail, Pre vs Post Quiz	0.0172907		Delta Score, Uplift	-23.3333		-2		-6			0	0		-2			-4
	Hake's Normalized Gain g	-0.411765		Post-Quiz Scores Std. Dev.	17.8885
	Grade 5, Group B, Statistics	Value		Grade 5, Group B	Ave.		05B01	05B02	05B03	05B04	05B05	05B06	05B07	05B08	05B09	05B10	05B11	05B12
	Ave. Delta Score Uplift	-20		Quiz Modules Taken	1				1	1	1	1				1	1	1
	Pre-Quiz Scores Std. Deviation	10.6904		Ave. Pre-Quiz Score	51.4286				4	6	4	6				6	6	4
	Group B Sigma	-1.87083		Ave. Post-Quiz Score	31.4286				2	0	2	6				4	4	4
	T-Test, 1-Tail, Pre vs Post Quiz	0.0174518		Delta Score, Uplift	-20				-2	-6	-2	0				-2	-2	0
	Hake's Normalized Gain g	-0.411765		Post-Quiz Scores Std. Dev.	19.518
	Grade 5, Group A vs B, Quiz 66	Value		Grade 5, Group A vs B, Quiz 66	Value
	T-Test, 1-Tail, A-Pre vs B-Pre	0.393712		Total Valid Quizzes Group A	5
	T-Test, 1-Tail, A-Post vs B-Post	0.346733		Total Valid Quizzes Group B	6
	T-Test, 1-Tail, A-Delta vs B-Delta	0.446247		Std Deviation of Delta Scores A	10.9545
	Total Valid Takers Group A, Min 5	5		Std Deviation of Delta Scores B	30.3315
	Total Valid Takers Group B, Min 5	6		Pooled Std Deviation of Delta A&B	23.758
				Cohen's Number d	0.065938
	Grade 5, Group A, Statistics	Value		Grade 5, Group A	Ave.		05A01	05A02	05A03	05A04	05A05	05A06	05A07	05A08	05A09	05A10	05A11	05A12	05A13
	Ave. Delta Score Uplift	8		Quiz Modules Taken	1		1		1	1				1			1
	Pre-Quiz Scores Std. Deviation	20		Ave. Pre-Quiz Score	40		2		4	2				6			6
	Group A Sigma	0.4		Ave. Post-Quiz Score	48		4		6	2				6			6
	T-Test, 1-Tail, Pre vs Post Quiz	0.261871		Delta Score, Uplift	8		2		2	0				0			0
	Hake's Normalized Gain g	0.133333		Post-Quiz Scores Std. Dev.	17.8885
	Grade 5, Group B, Statistics	Value		Grade 5, Group B	Ave.		05B01	05B02	05B03	05B04	05B05	05B06	05B07	05B08	05B09	05B10	05B11	05B12
	Ave. Delta Score Uplift	10		Quiz Modules Taken	1				1			1	1	1	1	1
	Pre-Quiz Scores Std. Deviation	19.6638		Ave. Pre-Quiz Score	43.3333				2			6	4	6	6	2
	Group B Sigma	0.508548		Ave. Post-Quiz Score	53.3333				4			6	10	4	4	4
	T-Test, 1-Tail, Pre vs Post Quiz	0.225287		Delta Score, Uplift	10				2			0	6	-2	-2	2
	Hake's Normalized Gain g	0.176471		Post-Quiz Scores Std. Dev.	24.2212
	Grade 5, Group A vs B, Quiz 76	Value		Grade 5, Group A vs B, Quiz 76	Value
	T-Test, 1-Tail, A-Pre vs B-Pre	0.259071		Total Valid Quizzes Group A	9
	T-Test, 1-Tail, A-Post vs B-Post	0.364091		Total Valid Quizzes Group B	11
	T-Test, 1-Tail, A-Delta vs B-Delta	0.0819338		Std Deviation of Delta Scores A	14.5297
	Total Valid Takers Group A, Min 5	9		Std Deviation of Delta Scores B	14.013
	Total Valid Takers Group B, Min 5	11		Pooled Std Deviation of Delta A&B	14.2449
				Cohen's Number d	0.663166
	Grade 5, Group A, Statistics	Value		Grade 5, Group A	Ave.		05A01	05A02	05A03	05A04	05A05	05A06	05A07	05A08	05A09	05A10	05A11	05A12	05A13
	Ave. Delta Score Uplift	28.8889		Quiz Modules Taken	1			1	1	1		1		1	1		1	1	1
	Pre-Quiz Scores Std. Deviation	20.2759		Ave. Pre-Quiz Score	51.1111			6	6	0		6		4	6		6	6	6
	Group A Sigma	1.42479		Ave. Post-Quiz Score	80			8	8	2		8		10	10		8	10	8
	T-Test, 1-Tail, Pre vs Post Quiz	0.00748371		Delta Score, Uplift	28.8889			2	2	2		2		6	4		2	4	2
	Hake's Normalized Gain g	0.590909		Post-Quiz Scores Std. Dev.	24.4949
	Grade 5, Group B, Statistics	Value		Grade 5, Group B	Ave.		05B01	05B02	05B03	05B04	05B05	05B06	05B07	05B08	05B09	05B10	05B11	05B12
	Ave. Delta Score Uplift	38.1818		Quiz Modules Taken	1		1	1	1	1	1	1	1	1	1		1	1
	Pre-Quiz Scores Std. Deviation	18.0907		Ave. Pre-Quiz Score	45.4545		6	6	4	6	0	4	6	4	6		4	4
	Group B Sigma	2.11058		Ave. Post-Quiz Score	83.6364		10	10	6	10	4	8	8	10	10		6	10
	T-Test, 1-Tail, Pre vs Post Quiz	0.000109972		Delta Score, Uplift	38.1818		4	4	2	4	4	4	2	6	4		2	6
	Hake's Normalized Gain g	0.7		Post-Quiz Scores Std. Dev.	21.5744
	Grade 5, Group A vs B, Quiz 77	Value		Grade 5, Group A vs B, Quiz 77	Value
	T-Test, 1-Tail, A-Pre vs B-Pre	0.0749417		Total Valid Quizzes Group A	9
	T-Test, 1-Tail, A-Post vs B-Post	0.128089		Total Valid Quizzes Group B	10
	T-Test, 1-Tail, A-Delta vs B-Delta	0.0383925		Std Deviation of Delta Scores A	28.2843
	Total Valid Takers Group A, Min 5	9		Std Deviation of Delta Scores B	30.1109
	Total Valid Takers Group B, Min 5	10		Pooled Std Deviation of Delta A&B	29.2655
				Cohen's Number d	-0.841334
	Grade 5, Group A, Statistics	Value		Grade 5, Group A	Ave.		05A01	05A02	05A03	05A04	05A05	05A06	05A07	05A08	05A09	05A10	05A11	05A12	05A13
	Ave. Delta Score Uplift	13.3333		Quiz Modules Taken	1			1	1	1		1		1	1	1	1	1
	Pre-Quiz Scores Std. Deviation	16.6667		Ave. Pre-Quiz Score	35.5556			2	6	2		2		4	4	4	2	6
	Group A Sigma	0.8		Ave. Post-Quiz Score	48.8889			2	10	4		0		8	4	2	8	6
	T-Test, 1-Tail, Pre vs Post Quiz	0.149526		Delta Score, Uplift	13.3333			0	4	2		-2		4	0	-2	6	0
	Hake's Normalized Gain g	0.206897		Post-Quiz Scores Std. Dev.	33.3333
	Grade 5, Group B, Statistics	Value		Grade 5, Group B	Ave.		05B01	05B02	05B03	05B04	05B05	05B06	05B07	05B08	05B09	05B10	05B11	05B12
	Ave. Delta Score Uplift	-12		Quiz Modules Taken	1		1	1	1	1	1		1		1	1	1	1
	Pre-Quiz Scores Std. Deviation	13.499		Ave. Pre-Quiz Score	46		6	4	2	6	4		4		4	4	6	6
	Group B Sigma	-0.888957		Ave. Post-Quiz Score	34		0	4	6	6	4		6		2	2	2	2
	T-Test, 1-Tail, Pre vs Post Quiz	0.0741325		Delta Score, Uplift	-12		-6	0	4	0	0		2		-2	-2	-4	-4
	Hake's Normalized Gain g	-0.222222		Post-Quiz Scores Std. Dev.	21.187
	Grade 5, Group A vs B, Quiz 79	Value		Grade 5, Group A vs B, Quiz 79	Value
	T-Test, 1-Tail, A-Pre vs B-Pre	0.447157		Total Valid Quizzes Group A	7
	T-Test, 1-Tail, A-Post vs B-Post	0.434592		Total Valid Quizzes Group B	8
	T-Test, 1-Tail, A-Delta vs B-Delta	0.451013		Std Deviation of Delta Scores A	25.4484
	Total Valid Takers Group A, Min 5	7		Std Deviation of Delta Scores B	18.5164
	Total Valid Takers Group B, Min 5	8		Pooled Std Deviation of Delta A&B	21.989
				Cohen's Number d	-0.0771517
	Grade 5, Group A, Statistics	Value		Grade 5, Group A	Ave.		05A01	05A02	05A03	05A04	05A05	05A06	05A07	05A08	05A09	05A10	05A11	05A12	05A13
	Ave. Delta Score Uplift	11.4286		Quiz Modules Taken	1			1	1		1	1			1		1	1
	Pre-Quiz Scores Std. Deviation	15.7359		Ave. Pre-Quiz Score	28.5714			0	4		4	4			4		2	2
	Group A Sigma	0.726273		Ave. Post-Quiz Score	40			0	10		2	4			4		4	4
	T-Test, 1-Tail, Pre vs Post Quiz	0.198101		Delta Score, Uplift	11.4286			0	6		-2	0			0		2	2
	Hake's Normalized Gain g	0.16		Post-Quiz Scores Std. Dev.	30.5505
	Grade 5, Group B, Statistics	Value		Grade 5, Group B	Ave.		05B01	05B02	05B03	05B04	05B05	05B06	05B07	05B08	05B09	05B10	05B11	05B12
	Ave. Delta Score Uplift	10		Quiz Modules Taken	1		1	1		1	1	1				1	1	1
	Pre-Quiz Scores Std. Deviation	14.8805		Ave. Pre-Quiz Score	27.5		2	2		2	4	2				2	6	2
	Group B Sigma	0.672022		Ave. Post-Quiz Score	37.5		2	2		4	2	2				4	10	4
	T-Test, 1-Tail, Pre vs Post Quiz	0.188036		Delta Score, Uplift	10		0	0		2	-2	0				2	4	2
	Hake's Normalized Gain g	0.137931		Post-Quiz Scores Std. Dev.	27.1241
	Grade 5, Group A vs B, Quiz 80	Value		Grade 5, Group A vs B, Quiz 80	Value
	T-Test, 1-Tail, A-Pre vs B-Pre	0.204079		Total Valid Quizzes Group A	8
	T-Test, 1-Tail, A-Post vs B-Post	0.193108		Total Valid Quizzes Group B	6
	T-Test, 1-Tail, A-Delta vs B-Delta	0.373253		Std Deviation of Delta Scores A	27.7746
	Total Valid Takers Group A, Min 5	8		Std Deviation of Delta Scores B	28.2843
	Total Valid Takers Group B, Min 5	6		Pooled Std Deviation of Delta A&B	27.9881
				Cohen's Number d	-0.176777
	Grade 5, Group A, Statistics	Value		Grade 5, Group A	Ave.		05A01	05A02	05A03	05A04	05A05	05A06	05A07	05A08	05A09	05A10	05A11	05A12	05A13
	Ave. Delta Score Uplift	5		Quiz Modules Taken	1			1	1	1	1	1		1	1			1
	Pre-Quiz Scores Std. Deviation	18.3225		Ave. Pre-Quiz Score	27.5			2	2	2	2	4		6	4			0
	Group A Sigma	0.272888		Ave. Post-Quiz Score	32.5			0	2	0	2	2		8	6			6
	T-Test, 1-Tail, Pre vs Post Quiz	0.347184		Delta Score, Uplift	5			-2	0	-2	0	-2		2	2			6
	Hake's Normalized Gain g	0.0689655		Post-Quiz Scores Std. Dev.	30.1188
	Grade 5, Group B, Statistics	Value		Grade 5, Group B	Ave.		05B01	05B02	05B03	05B04	05B05	05B06	05B07	05B08	05B09	05B10	05B11	05B12
	Ave. Delta Score Uplift	0		Quiz Modules Taken	1			1		1	1	1				1		1
	Pre-Quiz Scores Std. Deviation	12.6491		Ave. Pre-Quiz Score	20			2		0	2	2				4		2
	Group B Sigma	0		Ave. Post-Quiz Score	20			2		4	0	4				0		2
	T-Test, 1-Tail, Pre vs Post Quiz	0.5		Delta Score, Uplift	0			0		4	-2	2				-4		0
	Hake's Normalized Gain g	0		Post-Quiz Scores Std. Dev.	17.8885
	Grade 5, Group A vs B, Quiz 83	Value		Grade 5, Group A vs B, Quiz 83	Value
	T-Test, 1-Tail, A-Pre vs B-Pre	0.148333		Total Valid Quizzes Group A	6
	T-Test, 1-Tail, A-Post vs B-Post	0.33089		Total Valid Quizzes Group B	5
	T-Test, 1-Tail, A-Delta vs B-Delta	0.373007		Std Deviation of Delta Scores A	21.9089
	Total Valid Takers Group A, Min 5	6		Std Deviation of Delta Scores B	16.7332
	Total Valid Takers Group B, Min 5	5		Pooled Std Deviation of Delta A&B	19.7765
				Cohen's Number d	0.239046
	Grade 5, Group A, Statistics	Value		Grade 5, Group A	Ave.		05A01	05A02	05A03	05A04	05A05	05A06	05A07	05A08	05A09	05A10	05A11	05A12	05A13
	Ave. Delta Score Uplift	-20		Quiz Modules Taken	1				1	1		1		1	1			1
	Pre-Quiz Scores Std. Deviation	12.6491		Ave. Pre-Quiz Score	40				4	2		4		4	4			6
	Group A Sigma	-1.58114		Ave. Post-Quiz Score	20				4	2		0		4	0			2
	T-Test, 1-Tail, Pre vs Post Quiz	0.0246661		Delta Score, Uplift	-20				0	0		-4		0	-4			-4
	Hake's Normalized Gain g	-0.333333		Post-Quiz Scores Std. Dev.	17.8885
	Grade 5, Group B, Statistics	Value		Grade 5, Group B	Ave.		05B01	05B02	05B03	05B04	05B05	05B06	05B07	05B08	05B09	05B10	05B11	05B12
	Ave. Delta Score Uplift	-16		Quiz Modules Taken	1					1	1	1			1			1
	Pre-Quiz Scores Std. Deviation	10.9545		Ave. Pre-Quiz Score	32					2	2	4			4			4
	Group B Sigma	-1.46059		Ave. Post-Quiz Score	16					2	2	2			0			2
	T-Test, 1-Tail, Pre vs Post Quiz	0.0176326		Delta Score, Uplift	-16					0	0	-2			-4			-2
	Hake's Normalized Gain g	-0.235294		Post-Quiz Scores Std. Dev.	8.94427
	Grade 5, Group A vs B, Quiz Comb	Value		Grade 5, Group A vs B, Quiz Comb	Value
	T-Test, 1-Tail, A-Pre vs B-Pre	0.396883		Total Valid Quizzes Group A	78
	T-Test, 1-Tail, A-Post vs B-Post	0.30263		Total Valid Quizzes Group B	78
	T-Test, 1-Tail, A-Delta vs B-Delta	0.25645		Std Deviation of Delta Scores A	32.7667
	Total Valid Takers Group A, Min 5	78		Std Deviation of Delta Scores B	30.6789
	Total Valid Takers Group B, Min 5	78		Pooled Std Deviation of Delta A&B	31.74
				Cohen's Number d	-0.108652
	Grade 5, Group A, Statistics	Value		Grade 5, Group A	Ave.		05A01	05A02	05A03	05A04	05A05	05A06	05A07	05A08	05A09	05A10	05A11	05A12	05A13		05A01	05A02	05A03	05A04	05A05	05A06	05A07	05A08	05A09	05A10	05A11	05A12	05A13		05A01	05A02	05A03	05A04	05A05	05A06	05A07	05A08	05A09	05A10	05A11	05A12	05A13		05A01
	Ave. Delta Score Uplift	12.0513		Quiz Modules Taken	1		1	1	1	1	1	1	1			1	1	1	1		1			1	1	1	1			1	1	1	1		1		1	1	1		1			1		1	1		1
	Pre-Quiz Scores Std. Deviation	18.3357		Ave. Pre-Quiz Score	35.8974		2	0	4	4	4	6	4			2	2	2	2		0			4	2	4	4			4	6	0	2		2		6	4	2		6			6		2	4		4
	Group A Sigma	0.657259		Ave. Post-Quiz Score	47.9487		2	8	10	8	0	10	6			10	8	8	8		4			4	2	6	6			0	6	10	8		4		6	2	6		2			4		2	6		2
	T-Test, 1-Tail, Pre vs Post Quiz	0.00214256		Delta Score, Uplift	12.0513		0	8	6	4	-4	4	2			8	6	6	6		4			0	0	2	2			-4	0	10	6		2		0	-2	4		-4			-2		0	2		-2
	Hake's Normalized Gain g	0.188		Post-Quiz Scores Std. Dev.	31.8013
	Grade 5, Group B, Statistics	Value		Grade 5, Group B	Ave.		05B01	05B02	05B03	05B04	05B05	05B06	05B07	05B08	05B09	05B10	05B11	05B12			05B01	05B02	05B03	05B04	05B05	05B06	05B07	05B08	05B09	05B10	05B11	05B12			05B01	05B02	05B03	05B04	05B05	05B06	05B07	05B08	05B09	05B10	05B11	05B12			05B01
	Ave. Delta Score Uplift	8.71795		Quiz Modules Taken	1		1	1	1	1	1					1					1	1	1	1	1	1		1		1		1			1	1	1	1	1	1		1		1	1	1
	Pre-Quiz Scores Std. Deviation	18.352		Ave. Pre-Quiz Score	36.6667		2	6	2	4	6					2					0	2	4	4	4	6		6		2		2			4	2	0	2	4	4		2		2	6	0
	Group B Sigma	0.47504		Ave. Post-Quiz Score	45.3846		4	8	4	8	6					10					8	2	2	8	10	2		4		6		0			4	4	2	2	4	10		4		4	6	2
	T-Test, 1-Tail, Pre vs Post Quiz	0.0150552		Delta Score, Uplift	8.71795		2	2	2	4	0					8					8	0	-2	4	6	-4		-2		4		-2			0	2	2	0	0	6		2		2	0	2
	Hake's Normalized Gain g	0.137652		Post-Quiz Scores Std. Dev.	30.0083
	Grade 5, Group A vs B, Quiz Comb	Value		Grade 5, Group A vs B, Quiz Comb	Value
	T-Test, 1-Tail, A-Pre vs B-Pre	0.412813		Total Valid Quizzes Group A	42
	T-Test, 1-Tail, A-Post vs B-Post	0.33121		Total Valid Quizzes Group B	48
	T-Test, 1-Tail, A-Delta vs B-Delta	0.377296		Std Deviation of Delta Scores A	28.8091
	Total Valid Takers Group A, Min 5	42		Std Deviation of Delta Scores B	30.3613
	Total Valid Takers Group B, Min 5	48		Pooled Std Deviation of Delta A&B	29.6482
				Cohen's Number d	-0.064697
	Grade 5, Group A, Statistics	Value		Grade 5, Group A	Ave.																05A01	05A02	05A03	05A04	05A05	05A06	05A07	05A08	05A09	05A10	05A11	05A12	05A13		05A01	05A02	05A03	05A04	05A05	05A06	05A07	05A08	05A09	05A10	05A11	05A12	05A13
	Ave. Delta Score Uplift	15.7143		Quiz Modules Taken	1																1			1	1	1	1			1	1	1	1		1		1	1	1		1			1		1	1
	Pre-Quiz Scores Std. Deviation	19.5418		Ave. Pre-Quiz Score	37.1429																0			4	2	4	4			4	6	0	2		2		6	4	2		6			6		2	4
	Group A Sigma	0.804138		Ave. Post-Quiz Score	52.8571																4			4	2	6	6			0	6	10	8		4		6	2	6		2			4		2	6
	T-Test, 1-Tail, Pre vs Post Quiz	0.00311061		Delta Score, Uplift	15.7143																4			0	0	2	2			-4	0	10	6		2		0	-2	4		-4			-2		0	2
	Hake's Normalized Gain g	0.25		Post-Quiz Scores Std. Dev.	30.5467
	Grade 5, Group B, Statistics	Value		Grade 5, Group B	Ave.																05B01	05B02	05B03	05B04	05B05	05B06	05B07	05B08	05B09	05B10	05B11	05B12			05B01	05B02	05B03	05B04	05B05	05B06	05B07	05B08	05B09	05B10	05B11	05B12
	Ave. Delta Score Uplift	13.75		Quiz Modules Taken	1																1	1	1	1	1	1		1		1		1			1	1	1	1	1	1		1		1	1	1
	Pre-Quiz Scores Std. Deviation	18.7509		Ave. Pre-Quiz Score	36.25																0	2	4	4	4	6		6		2		2			4	2	0	2	4	4		2		2	6	0
	Group B Sigma	0.733299		Ave. Post-Quiz Score	50																8	2	2	8	10	2		4		6		0			4	4	2	2	4	10		4		4	6	2
	T-Test, 1-Tail, Pre vs Post Quiz	0.00512334		Delta Score, Uplift	13.75																8	0	-2	4	6	-4		-2		4		-2			0	2	2	0	0	6		2		2	0	2
	Hake's Normalized Gain g	0.215686		Post-Quiz Scores Std. Dev.	31.1482
	Grade 5, Group A vs B, Quiz Ave	Value		Grade 5, Group A vs B, Quiz Ave	Value
	T-Test, 1-Tail, A-Pre vs B-Pre	0.226329		Total Valid Quizzes Group A	7.8
	T-Test, 1-Tail, A-Post vs B-Post	0.315105		Total Valid Quizzes Group B	7.8
	T-Test, 1-Tail, A-Delta vs B-Delta	0.280816		Std Deviation of Delta Scores A	25.5301
	Total Valid Takers Group A, Min 5	7.8		Std Deviation of Delta Scores B	24.6362
	Total Valid Takers Group B, Min 5	7.8		Pooled Std Deviation of Delta A&B	25.5889
				Cohen's Number d	0.0271922
	Grade 5, Group A, Statistics	Value		Grade 5, Group A	Ave.
	Ave. Delta Score Uplift	8.73579		Quiz Modules Taken	1
	Pre-Quiz Scores Std. Deviation	17.3902		Ave. Pre-Quiz Score	36.4051
	Group A Sigma	0.413825		Ave. Post-Quiz Score	45.1409
	T-Test, 1-Tail, Pre vs Post Quiz	0.15494		Delta Score, Uplift	8.73579
	Hake's Normalized Gain g	0.131725		Post-Quiz Scores Std. Dev.	25.3561
	Grade 5, Group B, Statistics	Value		Grade 5, Group B	Ave.
	Ave. Delta Score Uplift	6.95152		Quiz Modules Taken	1
	Pre-Quiz Scores Std. Deviation	15.9065		Ave. Pre-Quiz Score	36.1716
	Group B Sigma	0.210635		Ave. Post-Quiz Score	43.1232
	T-Test, 1-Tail, Pre vs Post Quiz	0.126639		Delta Score, Uplift	6.95152
	Hake's Normalized Gain g	0.103502		Post-Quiz Scores Std. Dev.	22.3264
	Grade 5, Group A vs B, Quiz Ave	Value		Grade 5, Group A vs B, Quiz Ave	Value
	T-Test, 1-Tail, A-Pre vs B-Pre	0.234383		Total Valid Quizzes Group A	8.4
	T-Test, 1-Tail, A-Post vs B-Post	0.347758		Total Valid Quizzes Group B	9.6
	T-Test, 1-Tail, A-Delta vs B-Delta	0.194542		Std Deviation of Delta Scores A	27
	Total Valid Takers Group A, Min 5	8.4		Std Deviation of Delta Scores B	24.6891
	Total Valid Takers Group B, Min 5	9.6		Pooled Std Deviation of Delta A&B	25.827
				Cohen's Number d	0.0811477
	Grade 5, Group A, Statistics	Value		Grade 5, Group A	Ave.
	Ave. Delta Score Uplift	15.1746		Quiz Modules Taken	1
	Pre-Quiz Scores Std. Deviation	18.2941		Ave. Pre-Quiz Score	36.8254
	Group A Sigma	0.809412		Ave. Post-Quiz Score	52
	T-Test, 1-Tail, Pre vs Post Quiz	0.179564		Delta Score, Uplift	15.1746
	Hake's Normalized Gain g	0.254061		Post-Quiz Scores Std. Dev.	27.416
	Grade 5, Group B, Statistics	Value		Grade 5, Group B	Ave.
	Ave. Delta Score Uplift	13.103		Quiz Modules Taken	1
	Pre-Quiz Scores Std. Deviation	17.0888		Ave. Pre-Quiz Score	35.6576
	Group B Sigma	0.680717		Ave. Post-Quiz Score	48.7606
	T-Test, 1-Tail, Pre vs Post Quiz	0.097177		Delta Score, Uplift	13.103
	Hake's Normalized Gain g	0.206385		Post-Quiz Scores Std. Dev.	25.6942
	Grade 6, Group A vs B, Quiz 54	Value		Grade 6, Group A vs B, Quiz 54	Value
	T-Test, 1-Tail, A-Pre vs B-Pre	0.0494452		Total Valid Quizzes Group A	7
	T-Test, 1-Tail, A-Post vs B-Post	0.345141		Total Valid Quizzes Group B	7
	T-Test, 1-Tail, A-Delta vs B-Delta	0.195188		Std Deviation of Delta Scores A	22.6779
	Total Valid Takers Group A, Min 5	7		Std Deviation of Delta Scores B	11.547
	Total Valid Takers Group B, Min 5	7		Pooled Std Deviation of Delta A&B	17.9947
				Cohen's Number d	-0.742307
	Grade 6, Group A, Statistics	Value		Grade 6, Group A	Ave.		06A01	06A02	06A03	06A04	06A05	06A06	06A07	06A08	06A09	06A10	06A11	06A12
	Ave. Delta Score Uplift	28.5714		Quiz Modules Taken	1		1		1		1			1	1	1		1
	Pre-Quiz Scores Std. Deviation	13.8013		Ave. Pre-Quiz Score	42.8571		6		4		4			4	4	6		2
	Group A Sigma	2.0702		Ave. Post-Quiz Score	71.4286		6		8		6			10	8	6		6
	T-Test, 1-Tail, Pre vs Post Quiz	0.00178465		Delta Score, Uplift	28.5714		0		4		2			6	4	0		4
	Hake's Normalized Gain g	0.5		Post-Quiz Scores Std. Dev.	15.7359
	Grade 6, Group B, Statistics	Value		Grade 6, Group B	Ave.		06B01	06B02	06B03	06B04	06B05	06B06	06B07	06B08	06B09	06B10	06B11	06B12
	Ave. Delta Score Uplift	20		Quiz Modules Taken	1			1	1	1	1	1	1	1
	Pre-Quiz Scores Std. Deviation	9.759		Ave. Pre-Quiz Score	54.2857			6	4	6	4	6	6	6
	Group B Sigma	2.04939		Ave. Post-Quiz Score	74.2857			8	6	8	8	6	8	8
	T-Test, 1-Tail, Pre vs Post Quiz	0.00118899		Delta Score, Uplift	20			2	2	2	4	0	2	2
	Hake's Normalized Gain g	0.4375		Post-Quiz Scores Std. Dev.	9.759
	Grade 6, Group A vs B, Quiz 70	Value		Grade 6, Group A vs B, Quiz 70	Value
	T-Test, 1-Tail, A-Pre vs B-Pre	0.130017		Total Valid Quizzes Group A	8
	T-Test, 1-Tail, A-Post vs B-Post	0.0262613		Total Valid Quizzes Group B	8
	T-Test, 1-Tail, A-Delta vs B-Delta	0.214161		Std Deviation of Delta Scores A	34.5378
	Total Valid Takers Group A, Min 5	8		Std Deviation of Delta Scores B	26.1861
	Total Valid Takers Group B, Min 5	8		Pooled Std Deviation of Delta A&B	30.6478
				Cohen's Number d	0.477352
	Grade 6, Group A, Statistics	Value		Grade 6, Group A	Ave.		06A01	06A02	06A03	06A04	06A05	06A06	06A07	06A08	06A09	06A10	06A11	06A12
	Ave. Delta Score Uplift	-2.5		Quiz Modules Taken	1		1	1				1	1		1	1	1	1
	Pre-Quiz Scores Std. Deviation	23.7547		Ave. Pre-Quiz Score	27.5		2	0				4	6		2	6	2	0
	Group A Sigma	-0.105242		Ave. Post-Quiz Score	25		4	2				0	0		4	4	6	0
	T-Test, 1-Tail, Pre vs Post Quiz	0.417385		Delta Score, Uplift	-2.5		2	2				-4	-6		2	-2	4	0
	Hake's Normalized Gain g	-0.0344828		Post-Quiz Scores Std. Dev.	23.2993
	Grade 6, Group B, Statistics	Value		Grade 6, Group B	Ave.		06B01	06B02	06B03	06B04	06B05	06B06	06B07	06B08	06B09	06B10	06B11	06B12
	Ave. Delta Score Uplift	10		Quiz Modules Taken	1			1	1	1			1	1	1	1		1
	Pre-Quiz Scores Std. Deviation	18.5164		Ave. Pre-Quiz Score	40			6	2	6			2	4	4	2		6
	Group B Sigma	0.540062		Ave. Post-Quiz Score	50			8	6	6			4	0	4	6		6
	T-Test, 1-Tail, Pre vs Post Quiz	0.182715		Delta Score, Uplift	10			2	4	0			2	-4	0	4		0
	Hake's Normalized Gain g	0.166667		Post-Quiz Scores Std. Dev.	23.9046
	Grade 6, Group A vs B, Quiz 71a	Value		Grade 6, Group A vs B, Quiz 71a	Value
	T-Test, 1-Tail, A-Pre vs B-Pre	0.148884		Total Valid Quizzes Group A	7
	T-Test, 1-Tail, A-Post vs B-Post	0.334581		Total Valid Quizzes Group B	6
	T-Test, 1-Tail, A-Delta vs B-Delta	0.417283		Std Deviation of Delta Scores A	35.4562
	Total Valid Takers Group A, Min 5	7		Std Deviation of Delta Scores B	27.3252
	Total Valid Takers Group B, Min 5	6		Pooled Std Deviation of Delta A&B	32.0173
				Cohen's Number d	0.139414
	Grade 6, Group A, Statistics	Value		Grade 6, Group A	Ave.		06A01	06A02	06A03	06A04	06A05	06A06	06A07	06A08	06A09	06A10	06A11	06A12
	Ave. Delta Score Uplift	2.85714		Quiz Modules Taken	1		1					1	1		1	1	1	1
	Pre-Quiz Scores Std. Deviation	19.518		Ave. Pre-Quiz Score	51.4286		6					6	4		4	8	2	6
	Group A Sigma	0.146385		Ave. Post-Quiz Score	54.2857		10					10	6		4	6	2	0
	T-Test, 1-Tail, Pre vs Post Quiz	0.43096		Delta Score, Uplift	2.85714		4					4	2		0	-2	0	-6
	Hake's Normalized Gain g	0.0588235		Post-Quiz Scores Std. Dev.	37.7964
	Grade 6, Group B, Statistics	Value		Grade 6, Group B	Ave.		06B01	06B02	06B03	06B04	06B05	06B06	06B07	06B08	06B09	06B10	06B11	06B12
	Ave. Delta Score Uplift	6.66667		Quiz Modules Taken	1				1	1		1	1	1	1
	Pre-Quiz Scores Std. Deviation	17.8885		Ave. Pre-Quiz Score	40				6	4		2	6	4	2
	Group B Sigma	0.372678		Ave. Post-Quiz Score	46.6667				6	4		8	4	4	2
	T-Test, 1-Tail, Pre vs Post Quiz	0.281692		Delta Score, Uplift	6.66667				0	0		6	-2	0	0
	Hake's Normalized Gain g	0.111111		Post-Quiz Scores Std. Dev.	20.6559
	Grade 6, Group A vs B, Quiz Comb	Value		Grade 6, Group A vs B, Quiz Comb	Value
	T-Test, 1-Tail, A-Pre vs B-Pre	0.210543		Total Valid Quizzes Group A	22
	T-Test, 1-Tail, A-Post vs B-Post	0.175206		Total Valid Quizzes Group B	21
	T-Test, 1-Tail, A-Delta vs B-Delta	0.352829		Std Deviation of Delta Scores A	33.0813
	Total Valid Takers Group A, Min 5	22		Std Deviation of Delta Scores B	22.3394
	Total Valid Takers Group B, Min 5	21		Pooled Std Deviation of Delta A&B	28.3544
				Cohen's Number d	0.147276
	Grade 6, Group A, Statistics	Value		Grade 6, Group A	Ave.		06A01	06A02	06A03	06A04	06A05	06A06	06A07	06A08	06A09	06A10	06A11	06A12		06A01	06A02	06A03	06A04	06A05	06A06	06A07	06A08	06A09	06A10	06A11	06A12		06A01	06A02	06A03	06A04	06A05	06A06	06A07	06A08	06A09	06A10	06A11	06A12
	Ave. Delta Score Uplift	9.09091		Quiz Modules Taken	1		1		1		1			1	1	1		1		1	1				1	1		1	1	1	1		1					1	1		1	1	1	1
	Pre-Quiz Scores Std. Deviation	21.3809		Ave. Pre-Quiz Score	40		6		4		4			4	4	6		2		2	0				4	6		2	6	2	0		6					6	4		4	8	2	6
	Group A Sigma	0.425188		Ave. Post-Quiz Score	49.0909		6		8		6			10	8	6		6		4	2				0	0		4	4	6	0		10					10	6		4	6	2	0
	T-Test, 1-Tail, Pre vs Post Quiz	0.139646		Delta Score, Uplift	9.09091		0		4		2			6	4	0		4		2	2				-4	-6		2	-2	4	0		4					4	2		0	-2	0	-6
	Hake's Normalized Gain g	0.151515		Post-Quiz Scores Std. Dev.	32.5004
	Grade 6, Group B, Statistics	Value		Grade 6, Group B	Ave.		06B01	06B02	06B03	06B04	06B05	06B06	06B07	06B08	06B09	06B10	06B11	06B12		06B01	06B02	06B03	06B04	06B05	06B06	06B07	06B08	06B09	06B10	06B11	06B12		06B01	06B02	06B03	06B04	06B05	06B06	06B07	06B08	06B09	06B10	06B11	06B12
	Ave. Delta Score Uplift	12.381		Quiz Modules Taken	1			1	1	1	1	1	1	1							1	1	1			1	1	1	1		1				1	1		1	1	1	1
	Pre-Quiz Scores Std. Deviation	16.619		Ave. Pre-Quiz Score	44.7619			6	4	6	4	6	6	6							6	2	6			2	4	4	2		6				6	4		2	6	4	2
	Group B Sigma	0.744989		Ave. Post-Quiz Score	57.1429			8	6	8	8	6	8	8							8	6	6			4	0	4	6		6				6	4		8	4	4	2
	T-Test, 1-Tail, Pre vs Post Quiz	0.0235915		Delta Score, Uplift	12.381			2	2	2	4	0	2	2							2	4	0			2	-4	0	4		0				0	0		6	-2	0	0
	Hake's Normalized Gain g	0.224138		Post-Quiz Scores Std. Dev.	22.1682
	Grade 6, Group A vs B, Quiz Comb	Value		Grade 6, Group A vs B, Quiz Comb	Value
	T-Test, 1-Tail, A-Pre vs B-Pre	0.0442312		Total Valid Quizzes Group A	15
	T-Test, 1-Tail, A-Post vs B-Post	0.0725461		Total Valid Quizzes Group B	15
	T-Test, 1-Tail, A-Delta vs B-Delta	0.395872		Std Deviation of Delta Scores A	32.7763
	Total Valid Takers Group A, Min 5	15		Std Deviation of Delta Scores B	20.6559
	Total Valid Takers Group B, Min 5	15		Pooled Std Deviation of Delta A&B	27.3948
				Cohen's Number d	0.129099
	Grade 6, Group A, Statistics	Value		Grade 6, Group A	Ave.		06A01	06A02	06A03	06A04	06A05	06A06	06A07	06A08	06A09	06A10	06A11	06A12		06A01	06A02	06A03	06A04	06A05	06A06	06A07	06A08	06A09	06A10	06A11	06A12
	Ave. Delta Score Uplift	12		Quiz Modules Taken	1		1		1		1			1	1	1		1		1	1				1	1		1	1	1	1
	Pre-Quiz Scores Std. Deviation	20.6559		Ave. Pre-Quiz Score	34.6667		6		4		4			4	4	6		2		2	0				4	6		2	6	2	0
	Group A Sigma	0.580948		Ave. Post-Quiz Score	46.6667		6		8		6			10	8	6		6		4	2				0	0		4	4	6	0
	T-Test, 1-Tail, Pre vs Post Quiz	0.11055		Delta Score, Uplift	12		0		4		2			6	4	0		4		2	2				-4	-6		2	-2	4	0
	Hake's Normalized Gain g	0.183673		Post-Quiz Scores Std. Dev.	30.8607
	Grade 6, Group B, Statistics	Value		Grade 6, Group B	Ave.		06B01	06B02	06B03	06B04	06B05	06B06	06B07	06B08	06B09	06B10	06B11	06B12		06B01	06B02	06B03	06B04	06B05	06B06	06B07	06B08	06B09	06B10	06B11	06B12
	Ave. Delta Score Uplift	14.6667		Quiz Modules Taken	1			1	1	1	1	1	1	1							1	1	1			1	1	1	1		1
	Pre-Quiz Scores Std. Deviation	16.3299		Ave. Pre-Quiz Score	46.6667			6	4	6	4	6	6	6							6	2	6			2	4	4	2		6
	Group B Sigma	0.898146		Ave. Post-Quiz Score	61.3333			8	6	8	8	6	8	8							8	6	6			4	0	4	6		6
	T-Test, 1-Tail, Pre vs Post Quiz	0.0237189		Delta Score, Uplift	14.6667			2	2	2	4	0	2	2							2	4	0			2	-4	0	4		0
	Hake's Normalized Gain g	0.275		Post-Quiz Scores Std. Dev.	21.9957
	Grade 6, Group A vs B, Quiz Ave	Value		Grade 6, Group A vs B, Quiz Ave	Value
	T-Test, 1-Tail, A-Pre vs B-Pre	0.109449		Total Valid Quizzes Group A	7.33333
	T-Test, 1-Tail, A-Post vs B-Post	0.235328		Total Valid Quizzes Group B	7
	T-Test, 1-Tail, A-Delta vs B-Delta	0.275544		Std Deviation of Delta Scores A	30.8906
	Total Valid Takers Group A, Min 5	7.33333		Std Deviation of Delta Scores B	21.6861
	Total Valid Takers Group B, Min 5	7		Pooled Std Deviation of Delta A&B	26.8866
				Cohen's Number d	-0.0418472
	Grade 6, Group A, Statistics	Value		Grade 6, Group A	Ave.
	Ave. Delta Score Uplift	9.64286		Quiz Modules Taken	1
	Pre-Quiz Scores Std. Deviation	19.0247		Ave. Pre-Quiz Score	40.5952
	Group A Sigma	0.70378		Ave. Post-Quiz Score	50.2381
	T-Test, 1-Tail, Pre vs Post Quiz	0.283377		Delta Score, Uplift	9.64286
	Hake's Normalized Gain g	0.17478		Post-Quiz Scores Std. Dev.	25.6106
	Grade 6, Group B, Statistics	Value		Grade 6, Group B	Ave.
	Ave. Delta Score Uplift	12.2222		Quiz Modules Taken	1
	Pre-Quiz Scores Std. Deviation	15.388		Ave. Pre-Quiz Score	44.7619
	Group B Sigma	0.987377		Ave. Post-Quiz Score	56.9841
	T-Test, 1-Tail, Pre vs Post Quiz	0.155199		Delta Score, Uplift	12.2222
	Hake's Normalized Gain g	0.238426		Post-Quiz Scores Std. Dev.	18.1065
	Grade 6, Group A vs B, Quiz Ave	Value		Grade 6, Group A vs B, Quiz Ave	Value
	T-Test, 1-Tail, A-Pre vs B-Pre	0.089731		Total Valid Quizzes Group A	7.5
	T-Test, 1-Tail, A-Post vs B-Post	0.185701		Total Valid Quizzes Group B	7.5
	T-Test, 1-Tail, A-Delta vs B-Delta	0.204674		Std Deviation of Delta Scores A	28.6078
	Total Valid Takers Group A, Min 5	7.5		Std Deviation of Delta Scores B	18.8666
	Total Valid Takers Group B, Min 5	7.5		Pooled Std Deviation of Delta A&B	24.3212
				Cohen's Number d	-0.132478
	Grade 6, Group A, Statistics	Value		Grade 6, Group A	Ave.
	Ave. Delta Score Uplift	13.0357		Quiz Modules Taken	1
	Pre-Quiz Scores Std. Deviation	18.778		Ave. Pre-Quiz Score	35.1786
	Group A Sigma	0.982477		Ave. Post-Quiz Score	48.2143
	T-Test, 1-Tail, Pre vs Post Quiz	0.209585		Delta Score, Uplift	13.0357
	Hake's Normalized Gain g	0.232759		Post-Quiz Scores Std. Dev.	19.5176
	Grade 6, Group B, Statistics	Value		Grade 6, Group B	Ave.
	Ave. Delta Score Uplift	15		Quiz Modules Taken	1
	Pre-Quiz Scores Std. Deviation	14.1377		Ave. Pre-Quiz Score	47.1429
	Group B Sigma	1.29473		Ave. Post-Quiz Score	62.1429
	T-Test, 1-Tail, Pre vs Post Quiz	0.0919521		Delta Score, Uplift	15
	Hake's Normalized Gain g	0.302083		Post-Quiz Scores Std. Dev.	16.8318
	Grade 7, Group A vs B, Quiz 44	Value		Grade 7, Group A vs B, Quiz 44	Value
	T-Test, 1-Tail, A-Pre vs B-Pre	0.2224		Total Valid Quizzes Group A	8
	T-Test, 1-Tail, A-Post vs B-Post	0.0366825		Total Valid Quizzes Group B	5
	T-Test, 1-Tail, A-Delta vs B-Delta	0.170893		Std Deviation of Delta Scores A	23.9046
	Total Valid Takers Group A, Min 5	8		Std Deviation of Delta Scores B	26.0768
	Total Valid Takers Group B, Min 5	5		Pooled Std Deviation of Delta A&B	24.7166
				Cohen's Number d	0.536875
	Grade 7, Group A, Statistics	Value		Grade 7, Group A	Ave.		07A01	07A02	07A03	07A04	07A05	07A06	07A07	07A08	07A09	07A10	07A11
	Ave. Delta Score Uplift	10		Quiz Modules Taken	1		1		1	1	1	1			1	1	1
	Pre-Quiz Scores Std. Deviation	27.7746		Ave. Pre-Quiz Score	45		8		6	4	4	2			4	8	0
	Group A Sigma	0.360041		Ave. Post-Quiz Score	55		6		10	6	4	6			4	6	2
	T-Test, 1-Tail, Pre vs Post Quiz	0.224135		Delta Score, Uplift	10		-2		4	2	0	4			0	-2	2
	Hake's Normalized Gain g	0.181818		Post-Quiz Scores Std. Dev.	23.2993
	Grade 7, Group B, Statistics	Value		Grade 7, Group B	Ave.		07B01	07B02	07B03	07B04	07B05	07B06	07B07	07B08	07B09	07B10
	Ave. Delta Score Uplift	24		Quiz Modules Taken	1					1		1	1	1		1
	Pre-Quiz Scores Std. Deviation	16.7332		Ave. Pre-Quiz Score	56					6		4	4	6		8
	Group B Sigma	1.43427		Ave. Post-Quiz Score	80					6		8	10	6		10
	T-Test, 1-Tail, Pre vs Post Quiz	0.0367951		Delta Score, Uplift	24					0		4	6	0		2
	Hake's Normalized Gain g	0.545455		Post-Quiz Scores Std. Dev.	20
	Grade 7, Group A vs B, Quiz 46	Value		Grade 7, Group A vs B, Quiz 46	Value
	T-Test, 1-Tail, A-Pre vs B-Pre	0.2951		Total Valid Quizzes Group A	7
	T-Test, 1-Tail, A-Post vs B-Post	0.477765		Total Valid Quizzes Group B	6
	T-Test, 1-Tail, A-Delta vs B-Delta	0.375558		Std Deviation of Delta Scores A	25.8199
	Total Valid Takers Group A, Min 5	7		Std Deviation of Delta Scores B	46.7618
	Total Valid Takers Group B, Min 5	6		Pooled Std Deviation of Delta A&B	36.8453
				Cohen's Number d	-0.142566
	Grade 7, Group A, Statistics	Value		Grade 7, Group A	Ave.		07A01	07A02	07A03	07A04	07A05	07A06	07A07	07A08	07A09	07A10	07A11
	Ave. Delta Score Uplift	20		Quiz Modules Taken	1			1		1	1		1	1		1	1
	Pre-Quiz Scores Std. Deviation	15.1186		Ave. Pre-Quiz Score	45.7143			4		2	6		6	6		4	4
	Group A Sigma	1.32288		Ave. Post-Quiz Score	65.7143			10		2	10		4	8		6	6
	T-Test, 1-Tail, Pre vs Post Quiz	0.0702224		Delta Score, Uplift	20			6		0	4		-2	2		2	2
	Hake's Normalized Gain g	0.368421		Post-Quiz Scores Std. Dev.	29.9205
	Grade 7, Group B, Statistics	Value		Grade 7, Group B	Ave.		07B01	07B02	07B03	07B04	07B05	07B06	07B07	07B08	07B09	07B10
	Ave. Delta Score Uplift	13.3333		Quiz Modules Taken	1					1	1	1		1	1	1
	Pre-Quiz Scores Std. Deviation	32.6599		Ave. Pre-Quiz Score	53.3333					10	6	0		6	6	4
	Group B Sigma	0.408248		Ave. Post-Quiz Score	66.6667					10	6	10		6	2	6
	T-Test, 1-Tail, Pre vs Post Quiz	0.239548		Delta Score, Uplift	13.3333					0	0	10		0	-4	2
	Hake's Normalized Gain g	0.285714		Post-Quiz Scores Std. Dev.	30.1109
	Grade 7, Group A vs B, Quiz 48	Value		Grade 7, Group A vs B, Quiz 48	Value
	T-Test, 1-Tail, A-Pre vs B-Pre	0.318724		Total Valid Quizzes Group A	6
	T-Test, 1-Tail, A-Post vs B-Post	0.41687		Total Valid Quizzes Group B	8
	T-Test, 1-Tail, A-Delta vs B-Delta	0.462451		Std Deviation of Delta Scores A	20.6559
	Total Valid Takers Group A, Min 5	6		Std Deviation of Delta Scores B	38.1725
	Total Valid Takers Group B, Min 5	8		Pooled Std Deviation of Delta A&B	32.059
				Cohen's Number d	-0.0436614
	Grade 7, Group A, Statistics	Value		Grade 7, Group A	Ave.		07A01	07A02	07A03	07A04	07A05	07A06	07A07	07A08	07A09	07A10	07A11
	Ave. Delta Score Uplift	6.66667		Quiz Modules Taken	1		1	1		1	1			1			1
	Pre-Quiz Scores Std. Deviation	24.4949		Ave. Pre-Quiz Score	50		6	6		6	6			6			0
	Group A Sigma	0.272166		Ave. Post-Quiz Score	56.6667		6	6		4	6			8			4
	T-Test, 1-Tail, Pre vs Post Quiz	0.291294		Delta Score, Uplift	6.66667		0	0		-2	0			2			4
	Hake's Normalized Gain g	0.133333		Post-Quiz Scores Std. Dev.	15.0555
	Grade 7, Group B, Statistics	Value		Grade 7, Group B	Ave.		07B01	07B02	07B03	07B04	07B05	07B06	07B07	07B08	07B09	07B10
	Ave. Delta Score Uplift	5		Quiz Modules Taken	1				1	1	1	1	1	1	1	1
	Pre-Quiz Scores Std. Deviation	14.1421		Ave. Pre-Quiz Score	55				6	8	6	6	4	6	4	4
	Group B Sigma	0.353553		Ave. Post-Quiz Score	60				6	6	8	0	10	10	6	2
	T-Test, 1-Tail, Pre vs Post Quiz	0.358285		Delta Score, Uplift	5				0	-2	2	-6	6	4	2	-2
	Hake's Normalized Gain g	0.111111		Post-Quiz Scores Std. Dev.	35.4562
	Grade 7, Group A vs B, Quiz 49	Value		Grade 7, Group A vs B, Quiz 49	Value
	T-Test, 1-Tail, A-Pre vs B-Pre	0.0613983		Total Valid Quizzes Group A	7
	T-Test, 1-Tail, A-Post vs B-Post	0.375558		Total Valid Quizzes Group B	6
	T-Test, 1-Tail, A-Delta vs B-Delta	0.202899		Std Deviation of Delta Scores A	22.2539
	Total Valid Takers Group A, Min 5	7		Std Deviation of Delta Scores B	23.3809
	Total Valid Takers Group B, Min 5	6		Pooled Std Deviation of Delta A&B	22.7731
				Cohen's Number d	-0.468433
	Grade 7, Group A, Statistics	Value		Grade 7, Group A	Ave.		07A01	07A02	07A03	07A04	07A05	07A06	07A07	07A08	07A09	07A10	07A11
	Ave. Delta Score Uplift	14.2857		Quiz Modules Taken	1		1		1	1				1	1	1	1
	Pre-Quiz Scores Std. Deviation	23.094		Ave. Pre-Quiz Score	40		4		6	4				6	2	6	0
	Group A Sigma	0.61859		Ave. Post-Quiz Score	54.2857		4		10	2				8	6	8	0
	T-Test, 1-Tail, Pre vs Post Quiz	0.197062		Delta Score, Uplift	14.2857		0		4	-2				2	4	2	0
	Hake's Normalized Gain g	0.238095		Post-Quiz Scores Std. Dev.	35.9894
	Grade 7, Group B, Statistics	Value		Grade 7, Group B	Ave.		07B01	07B02	07B03	07B04	07B05	07B06	07B07	07B08	07B09	07B10
	Ave. Delta Score Uplift	3.33333		Quiz Modules Taken	1		1	1		1	1				1	1
	Pre-Quiz Scores Std. Deviation	8.16497		Ave. Pre-Quiz Score	56.6667		6	4		6	6				6	6
	Group B Sigma	0.408248		Ave. Post-Quiz Score	60		8	4		6	10				4	4
	T-Test, 1-Tail, Pre vs Post Quiz	0.382516		Delta Score, Uplift	3.33333		2	0		0	4				-2	-2
	Hake's Normalized Gain g	0.0769231		Post-Quiz Scores Std. Dev.	25.2982
	Grade 8, Group A vs B, Quiz 40	Value		Grade 8, Group A vs B, Quiz 40	Value
	T-Test, 1-Tail, A-Pre vs B-Pre	0.198602		Total Valid Quizzes Group A	5
	T-Test, 1-Tail, A-Post vs B-Post	0.100267		Total Valid Quizzes Group B	5
	T-Test, 1-Tail, A-Delta vs B-Delta	0.0441537		Std Deviation of Delta Scores A	16.7332
	Total Valid Takers Group A, Min 5	5		Std Deviation of Delta Scores B	32.8634
	Total Valid Takers Group B, Min 5	5		Pooled Std Deviation of Delta A&B	26.0768
				Cohen's Number d	-0.973729
	Grade 8, Group A, Statistics	Value		Grade 8, Group A	Ave.		08A01	08A02	08A03	08A04	08A05	08A06	08A07	08A08	08A09	08A10	08A11	08A12	08A13
	Ave. Delta Score Uplift	16		Quiz Modules Taken	1			1				1				1		1	1
	Pre-Quiz Scores Std. Deviation	17.8885		Ave. Pre-Quiz Score	48			4				6				6		2	6
	Group A Sigma	0.894427		Ave. Post-Quiz Score	64			8				8				6		2	8
	T-Test, 1-Tail, Pre vs Post Quiz	0.145336		Delta Score, Uplift	16			4				2				0		0	2
	Hake's Normalized Gain g	0.307692		Post-Quiz Scores Std. Dev.	26.0768
	Grade 8, Group B, Statistics	Value		Grade 8, Group B	Ave.		08B01	08B02	08B03	08B04	08B05	08B06	08B07	08B08	08B09	08B10	08B11	08B12	08B13	08B14
	Ave. Delta Score Uplift	-16		Quiz Modules Taken	1					1		1	1	1			1
	Pre-Quiz Scores Std. Deviation	8.94427		Ave. Pre-Quiz Score	56					6		4	6	6			6
	Group B Sigma	-1.78885		Ave. Post-Quiz Score	40					0		6	6	6			2
	T-Test, 1-Tail, Pre vs Post Quiz	0.131127		Delta Score, Uplift	-16					-6		2	0	0			-4
	Hake's Normalized Gain g	-0.363636		Post-Quiz Scores Std. Dev.	28.2843
	Grade 8, Group A vs B, Quiz 41	Value		Grade 8, Group A vs B, Quiz 41	Value
	T-Test, 1-Tail, A-Pre vs B-Pre	0.102306		Total Valid Quizzes Group A	6
	T-Test, 1-Tail, A-Post vs B-Post	0.320024		Total Valid Quizzes Group B	8
	T-Test, 1-Tail, A-Delta vs B-Delta	0.352073		Std Deviation of Delta Scores A	20.9762
	Total Valid Takers Group A, Min 5	6		Std Deviation of Delta Scores B	25.6348
	Total Valid Takers Group B, Min 5	8		Pooled Std Deviation of Delta A&B	23.8048
				Cohen's Number d	-0.195047
	Grade 8, Group A, Statistics	Value		Grade 8, Group A	Ave.		08A01	08A02	08A03	08A04	08A05	08A06	08A07	08A08	08A09	08A10	08A11	08A12	08A13
	Ave. Delta Score Uplift	10		Quiz Modules Taken	1			1					1		1	1		1	1
	Pre-Quiz Scores Std. Deviation	15.0555		Ave. Pre-Quiz Score	36.6667			4					4		6	2		2	4
	Group A Sigma	0.664211		Ave. Post-Quiz Score	46.6667			6					4		4	4		2	8
	T-Test, 1-Tail, Pre vs Post Quiz	0.18025		Delta Score, Uplift	10			2					0		-2	2		0	4
	Hake's Normalized Gain g	0.157895		Post-Quiz Scores Std. Dev.	20.6559
	Grade 8, Group B, Statistics	Value		Grade 8, Group B	Ave.		08B01	08B02	08B03	08B04	08B05	08B06	08B07	08B08	08B09	08B10	08B11	08B12	08B13	08B14
	Ave. Delta Score Uplift	5		Quiz Modules Taken	1						1	1	1	1	1	1	1		1
	Pre-Quiz Scores Std. Deviation	14.8805		Ave. Pre-Quiz Score	47.5						6	6	4	6	2	6	4		4
	Group B Sigma	0.336011		Ave. Post-Quiz Score	52.5						6	4	2	6	4	6	4		10
	T-Test, 1-Tail, Pre vs Post Quiz	0.31087		Delta Score, Uplift	5						0	-2	-2	0	2	0	0		6
	Hake's Normalized Gain g	0.0952381		Post-Quiz Scores Std. Dev.	23.7547
	Grade 8, Group A vs B, Quiz 42	Value		Grade 8, Group A vs B, Quiz 42	Value
	T-Test, 1-Tail, A-Pre vs B-Pre	0.167414		Total Valid Quizzes Group A	9
	T-Test, 1-Tail, A-Post vs B-Post	0.282918		Total Valid Quizzes Group B	6
	T-Test, 1-Tail, A-Delta vs B-Delta	0.155863		Std Deviation of Delta Scores A	31.2694
	Total Valid Takers Group A, Min 5	9		Std Deviation of Delta Scores B	21.9089
	Total Valid Takers Group B, Min 5	6		Pooled Std Deviation of Delta A&B	28.0415
				Cohen's Number d	0.710011
	Grade 8, Group A, Statistics	Value		Grade 8, Group A	Ave.		08A01	08A02	08A03	08A04	08A05	08A06	08A07	08A08	08A09	08A10	08A11	08A12	08A13
	Ave. Delta Score Uplift	4.44444		Quiz Modules Taken	1		1	1				1		1	1	1	1	1	1
	Pre-Quiz Scores Std. Deviation	14.5297		Ave. Pre-Quiz Score	51.1111		4	4				6		6	6	2	6	6	6
	Group A Sigma	0.305888		Ave. Post-Quiz Score	55.5556		10	4				4		10	4	2	8	2	6
	T-Test, 1-Tail, Pre vs Post Quiz	0.352038		Delta Score, Uplift	4.44444		6	0				-2		4	-2	0	2	-4	0
	Hake's Normalized Gain g	0.0909091		Post-Quiz Scores Std. Dev.	31.2694
	Grade 8, Group B, Statistics	Value		Grade 8, Group B	Ave.		08B01	08B02	08B03	08B04	08B05	08B06	08B07	08B08	08B09	08B10	08B11	08B12	08B13	08B14
	Ave. Delta Score Uplift	20		Quiz Modules Taken	1						1		1	1	1	1				1
	Pre-Quiz Scores Std. Deviation	15.0555		Ave. Pre-Quiz Score	43.3333						4		4	6	2	4				6
	Group B Sigma	1.32842		Ave. Post-Quiz Score	63.3333						6		6	6	8	6				6
	T-Test, 1-Tail, Pre vs Post Quiz	0.00847282		Delta Score, Uplift	20						2		2	0	6	2				0
	Hake's Normalized Gain g	0.352941		Post-Quiz Scores Std. Dev.	8.16497
	Grade 8, Group A vs B, Quiz 43	Value		Grade 8, Group A vs B, Quiz 43	Value
	T-Test, 1-Tail, A-Pre vs B-Pre	0.311253		Total Valid Quizzes Group A	7
	T-Test, 1-Tail, A-Post vs B-Post	0.265688		Total Valid Quizzes Group B	7
	T-Test, 1-Tail, A-Delta vs B-Delta	0.331343		Std Deviation of Delta Scores A	15.1186
	Total Valid Takers Group A, Min 5	7		Std Deviation of Delta Scores B	7.55929
	Total Valid Takers Group B, Min 5	7		Pooled Std Deviation of Delta A&B	11.9523
				Cohen's Number d	-0.377964
	Grade 8, Group A, Statistics	Value		Grade 8, Group A	Ave.		08A01	08A02	08A03	08A04	08A05	08A06	08A07	08A08	08A09	08A10	08A11	08A12	08A13
	Ave. Delta Score Uplift	5.71429		Quiz Modules Taken	1		1		1				1			1	1	1	1
	Pre-Quiz Scores Std. Deviation	22.2539		Ave. Pre-Quiz Score	45.7143		4		6				6			0	6	4	6
	Group A Sigma	0.256776		Ave. Post-Quiz Score	51.4286		4		8				6			0	8	6	4
	T-Test, 1-Tail, Pre vs Post Quiz	0.339815		Delta Score, Uplift	5.71429		0		2				0			0	2	2	-2
	Hake's Normalized Gain g	0.105263		Post-Quiz Scores Std. Dev.	27.9455
	Grade 8, Group B, Statistics	Value		Grade 8, Group B	Ave.		08B01	08B02	08B03	08B04	08B05	08B06	08B07	08B08	08B09	08B10	08B11	08B12	08B13	08B14
	Ave. Delta Score Uplift	2.85714		Quiz Modules Taken	1		1				1	1	1	1	1				1
	Pre-Quiz Scores Std. Deviation	20		Ave. Pre-Quiz Score	40		6				2	2	6	2	4				6
	Group B Sigma	0.142857		Ave. Post-Quiz Score	42.8571		6				2	2	6	2	6				6
	T-Test, 1-Tail, Pre vs Post Quiz	0.400314		Delta Score, Uplift	2.85714		0				0	0	0	0	2				0
	Hake's Normalized Gain g	0.047619		Post-Quiz Scores Std. Dev.	21.3809
	Grade 8, Group A vs B, Quiz 44	Value		Grade 8, Group A vs B, Quiz 44	Value
	T-Test, 1-Tail, A-Pre vs B-Pre	0.331487		Total Valid Quizzes Group A	7
	T-Test, 1-Tail, A-Post vs B-Post	0.111638		Total Valid Quizzes Group B	8
	T-Test, 1-Tail, A-Delta vs B-Delta	0.0892797		Std Deviation of Delta Scores A	23.094
	Total Valid Takers Group A, Min 5	7		Std Deviation of Delta Scores B	17.7281
	Total Valid Takers Group B, Min 5	8		Pooled Std Deviation of Delta A&B	20.381
				Cohen's Number d	0.846114
	Grade 8, Group A, Statistics	Value		Grade 8, Group A	Ave.		08A01	08A02	08A03	08A04	08A05	08A06	08A07	08A08	08A09	08A10	08A11	08A12	08A13
	Ave. Delta Score Uplift	0		Quiz Modules Taken	1		1	1	1				1		1	1		1
	Pre-Quiz Scores Std. Deviation	15.1186		Ave. Pre-Quiz Score	45.7143		4	4	6				2		4	6		6
	Group A Sigma	0		Ave. Post-Quiz Score	45.7143		4	4	6				6		4	2		6
	T-Test, 1-Tail, Pre vs Post Quiz	0.5		Delta Score, Uplift	0		0	0	0				4		0	-4		0
	Hake's Normalized Gain g	0		Post-Quiz Scores Std. Dev.	15.1186
	Grade 8, Group B, Statistics	Value		Grade 8, Group B	Ave.		08B01	08B02	08B03	08B04	08B05	08B06	08B07	08B08	08B09	08B10	08B11	08B12	08B13	08B14
	Ave. Delta Score Uplift	15		Quiz Modules Taken	1		1				1	1	1	1	1				1	1
	Pre-Quiz Scores Std. Deviation	12.8174		Ave. Pre-Quiz Score	42.5		4				4	4	6	2	6				4	4
	Group B Sigma	1.17028		Ave. Post-Quiz Score	57.5		8				2	6	6	4	8				6	6
	T-Test, 1-Tail, Pre vs Post Quiz	0.0469316		Delta Score, Uplift	15		4				-2	2	0	2	2				2	2
	Hake's Normalized Gain g	0.26087		Post-Quiz Scores Std. Dev.	19.8206
	Grade 8, Group A vs B, Quiz 47	Value		Grade 8, Group A vs B, Quiz 47	Value
	T-Test, 1-Tail, A-Pre vs B-Pre	0.0202565		Total Valid Quizzes Group A	8
	T-Test, 1-Tail, A-Post vs B-Post	0.432575		Total Valid Quizzes Group B	5
	T-Test, 1-Tail, A-Delta vs B-Delta	0.0594486		Std Deviation of Delta Scores A	22.5198
	Total Valid Takers Group A, Min 5	8		Std Deviation of Delta Scores B	21.9089
	Total Valid Takers Group B, Min 5	5		Pooled Std Deviation of Delta A&B	22.2996
				Cohen's Number d	0.981336
	Grade 8, Group A, Statistics	Value		Grade 8, Group A	Ave.		08A01	08A02	08A03	08A04	08A05	08A06	08A07	08A08	08A09	08A10	08A11	08A12	08A13
	Ave. Delta Score Uplift	2.5		Quiz Modules Taken	1		1	1	1			1	1	1	1		1
	Pre-Quiz Scores Std. Deviation	18.3225		Ave. Pre-Quiz Score	47.5		6	2	4			2	6	6	6		6
	Group A Sigma	0.136444		Ave. Post-Quiz Score	50		4	4	6			4	6	6	2		8
	T-Test, 1-Tail, Pre vs Post Quiz	0.395004		Delta Score, Uplift	2.5		-2	2	2			2	0	0	-4		2
	Hake's Normalized Gain g	0.047619		Post-Quiz Scores Std. Dev.	18.5164
	Grade 8, Group B, Statistics	Value		Grade 8, Group B	Ave.		08B01	08B02	08B03	08B04	08B05	08B06	08B07	08B08	08B09	08B10	08B11	08B12	08B13	08B14
	Ave. Delta Score Uplift	24		Quiz Modules Taken	1						1	1		1		1				1
	Pre-Quiz Scores Std. Deviation	16.7332		Ave. Pre-Quiz Score	24						0	2		2		4				4
	Group B Sigma	1.43427		Ave. Post-Quiz Score	48						4	6		2		8				4
	T-Test, 1-Tail, Pre vs Post Quiz	0.0471749		Delta Score, Uplift	24						4	4		0		4				0
	Hake's Normalized Gain g	0.315789		Post-Quiz Scores Std. Dev.	22.8035
	Grade 8, Group A vs B, Quiz 48	Value		Grade 8, Group A vs B, Quizn 48	Value
	T-Test, 1-Tail, A-Pre vs B-Pre	0.379242		Total Valid Quizzes Group A	6
	T-Test, 1-Tail, A-Post vs B-Post	0.30928		Total Valid Quizzes Group B	10
	T-Test, 1-Tail, A-Delta vs B-Delta	0.250212		Std Deviation of Delta Scores A	26.5832
	Total Valid Takers Group A, Min 5	6		Std Deviation of Delta Scores B	34.254
	Total Valid Takers Group B, Min 5	10		Pooled Std Deviation of Delta A&B	31.728
				Cohen's Number d	-0.330862
	Grade 8, Group A, Statistics	Value		Grade 8, Group A	Ave.		08A01	08A02	08A03	08A04	08A05	08A06	08A07	08A08	08A09	08A10	08A11	08A12	08A13
	Ave. Delta Score Uplift	23.3333		Quiz Modules Taken	1		1	1	1					1	1				1
	Pre-Quiz Scores Std. Deviation	19.6638		Ave. Pre-Quiz Score	36.6667		2	2	6					6	4				2
	Group A Sigma	1.18661		Ave. Post-Quiz Score	60		8	2	6					10	4				6
	T-Test, 1-Tail, Pre vs Post Quiz	0.0640365		Delta Score, Uplift	23.3333		6	0	0					4	0				4
	Hake's Normalized Gain g	0.368421		Post-Quiz Scores Std. Dev.	28.2843
	Grade 8, Group B, Statistics	Value		Grade 8, Group B	Ave.		08B01	08B02	08B03	08B04	08B05	08B06	08B07	08B08	08B09	08B10	08B11	08B12	08B13	08B14
	Ave. Delta Score Uplift	12		Quiz Modules Taken	1		1	1	1		1	1	1		1	1			1	1
	Pre-Quiz Scores Std. Deviation	21.0819		Ave. Pre-Quiz Score	40		4	2	6		6	4	4		2	0			6	6
	Group B Sigma	0.56921		Ave. Post-Quiz Score	52		10	6	8		2	10	4		2	2			4	4
	T-Test, 1-Tail, Pre vs Post Quiz	0.165282		Delta Score, Uplift	12		6	4	2		-4	6	0		0	2			-2	-2
	Hake's Normalized Gain g	0.2		Post-Quiz Scores Std. Dev.	31.5524
	Grade 8, Group A vs B, Quiz 49	Value		Grade 8, Group A vs B, Quiz 49	Value
	T-Test, 1-Tail, A-Pre vs B-Pre	0.445293		Total Valid Quizzes Group A	8
	T-Test, 1-Tail, A-Post vs B-Post	0.232669		Total Valid Quizzes Group B	10
	T-Test, 1-Tail, A-Delta vs B-Delta	0.285622		Std Deviation of Delta Scores A	24.9285
	Total Valid Takers Group A, Min 5	8		Std Deviation of Delta Scores B	22.7058
	Total Valid Takers Group B, Min 5	10		Pooled Std Deviation of Delta A&B	23.7039
				Cohen's Number d	-0.28627
	Grade 8, Group A, Statistics	Value		Grade 8, Group A	Ave.		08A01	08A02	08A03	08A04	08A05	08A06	08A07	08A08	08A09	08A10	08A11	08A12	08A13
	Ave. Delta Score Uplift	2.5		Quiz Modules Taken	1		1	1	1			1	1	1	1				1
	Pre-Quiz Scores Std. Deviation	17.7281		Ave. Pre-Quiz Score	45		2	6	4			6	2	6	4				6
	Group A Sigma	0.141019		Ave. Post-Quiz Score	47.5		6	2	4			4	4	8	4				6
	T-Test, 1-Tail, Pre vs Post Quiz	0.392782		Delta Score, Uplift	2.5		4	-4	0			-2	2	2	0				0
	Hake's Normalized Gain g	0.0454545		Post-Quiz Scores Std. Dev.	18.3225
	Grade 8, Group B, Statistics	Value		Grade 8, Group B	Ave.		08B01	08B02	08B03	08B04	08B05	08B06	08B07	08B08	08B09	08B10	08B11	08B12	08B13	08B14
	Ave. Delta Score Uplift	-4		Quiz Modules Taken	1		1	1	1		1	1		1	1	1			1	1
	Pre-Quiz Scores Std. Deviation	12.6491		Ave. Pre-Quiz Score	44		4	4	6		6	4		2	6	4			4	4
	Group B Sigma	-0.316228		Ave. Post-Quiz Score	40		2	8	4		2	4		2	8	2			4	4
	T-Test, 1-Tail, Pre vs Post Quiz	0.31837		Delta Score, Uplift	-4		-2	4	-2		-4	0		0	2	-2			0	0
	Hake's Normalized Gain g	-0.0714286		Post-Quiz Scores Std. Dev.	23.094
	Grade 8, Group A vs B, Quiz 50	Value		Grade 8, Group A vs B, Quiz 50	Value
	T-Test, 1-Tail, A-Pre vs B-Pre	0.295114		Total Valid Quizzes Group A	5
	T-Test, 1-Tail, A-Post vs B-Post	0.291193		Total Valid Quizzes Group B	9
	T-Test, 1-Tail, A-Delta vs B-Delta	0.485771		Std Deviation of Delta Scores A	16.7332
	Total Valid Takers Group A, Min 5	5		Std Deviation of Delta Scores B	24.037
	Total Valid Takers Group B, Min 5	9		Pooled Std Deviation of Delta A&B	21.8751
				Cohen's Number d	0.01849
	Grade 8, Group A, Statistics	Value		Grade 8, Group A	Ave.		08A01	08A02	08A03	08A04	08A05	08A06	08A07	08A08	08A09	08A10	08A11	08A12	08A13
	Ave. Delta Score Uplift	4		Quiz Modules Taken	1		1		1			1			1				1
	Pre-Quiz Scores Std. Deviation	14.1421		Ave. Pre-Quiz Score	40		2		4			4			6				4
	Group A Sigma	0.282843		Ave. Post-Quiz Score	44		4		6			4			4				4
	T-Test, 1-Tail, Pre vs Post Quiz	0.303756		Delta Score, Uplift	4		2		2			0			-2				0
	Hake's Normalized Gain g	0.0666667		Post-Quiz Scores Std. Dev.	8.94427
	Grade 8, Group B, Statistics	Value		Grade 8, Group B	Ave.		08B01	08B02	08B03	08B04	08B05	08B06	08B07	08B08	08B09	08B10	08B11	08B12	08B13	08B14
	Ave. Delta Score Uplift	4.44444		Quiz Modules Taken	1		1	1			1	1	1	1	1				1	1
	Pre-Quiz Scores Std. Deviation	24.4949		Ave. Pre-Quiz Score	33.3333		6	2			0	0	6	2	4				4	6
	Group B Sigma	0.181444		Ave. Post-Quiz Score	37.7778		8	2			2	4	2	2	6				2	6
	T-Test, 1-Tail, Pre vs Post Quiz	0.349344		Delta Score, Uplift	4.44444		2	0			2	4	-4	0	2				-2	0
	Hake's Normalized Gain g	0.0666667		Post-Quiz Scores Std. Dev.	23.3333
	Grade 8, Group A vs B, Quiz 52	Value		Grade 8, Group A vs B, Quiz 52	Value
	T-Test, 1-Tail, A-Pre vs B-Pre	0.0906019		Total Valid Quizzes Group A	7
	T-Test, 1-Tail, A-Post vs B-Post	0.429482		Total Valid Quizzes Group B	10
	T-Test, 1-Tail, A-Delta vs B-Delta	0.174464		Std Deviation of Delta Scores A	13.8013
	Total Valid Takers Group A, Min 5	7		Std Deviation of Delta Scores B	21.187
	Total Valid Takers Group B, Min 5	10		Pooled Std Deviation of Delta A&B	18.5883
				Cohen's Number d	-0.418046
	Grade 8, Group A, Statistics	Value		Grade 8, Group A	Ave.		08A01	08A02	08A03	08A04	08A05	08A06	08A07	08A08	08A09	08A10	08A11	08A12	08A13
	Ave. Delta Score Uplift	22.8571		Quiz Modules Taken	1		1	1				1		1	1			1	1
	Pre-Quiz Scores Std. Deviation	17.9947		Ave. Pre-Quiz Score	37.1429		4	2				2		6	4			2	6
	Group A Sigma	1.27021		Ave. Post-Quiz Score	60		6	2				4		10	6			6	8
	T-Test, 1-Tail, Pre vs Post Quiz	0.0393651		Delta Score, Uplift	22.8571		2	0				2		4	2			4	2
	Hake's Normalized Gain g	0.363636		Post-Quiz Scores Std. Dev.	25.8199
	Grade 8, Group B, Statistics	Value		Grade 8, Group B	Ave.		08B01	08B02	08B03	08B04	08B05	08B06	08B07	08B08	08B09	08B10	08B11	08B12	08B13	08B14
	Ave. Delta Score Uplift	14		Quiz Modules Taken	1		1	1	1		1	1	1	1				1	1	1
	Pre-Quiz Scores Std. Deviation	13.9841		Ave. Pre-Quiz Score	48		6	6	4		4	4	4	2				6	6	6
	Group B Sigma	1.00114		Ave. Post-Quiz Score	62		10	6	8		2	6	6	6				6	6	6
	T-Test, 1-Tail, Pre vs Post Quiz	0.0426415		Delta Score, Uplift	14		4	0	4		-2	2	2	4				0	0	0
	Hake's Normalized Gain g	0.269231		Post-Quiz Scores Std. Dev.	19.8886
	Grade 8, Group A vs B, Quiz 55	Value		Grade 8, Group A vs B, Quiz 55	Value
	T-Test, 1-Tail, A-Pre vs B-Pre	0.0826833		Total Valid Quizzes Group A	8
	T-Test, 1-Tail, A-Post vs B-Post	0.276613		Total Valid Quizzes Group B	10
	T-Test, 1-Tail, A-Delta vs B-Delta	0.380283		Std Deviation of Delta Scores A	26.1861
	Total Valid Takers Group A, Min 5	8		Std Deviation of Delta Scores B	27.9682
	Total Valid Takers Group B, Min 5	10		Pooled Std Deviation of Delta A&B	27.2029
				Cohen's Number d	-0.143019
	Grade 8, Group A, Statistics	Value		Grade 8, Group A	Ave.		08A01	08A02	08A03	08A04	08A05	08A06	08A07	08A08	08A09	08A10	08A11	08A12	08A13
	Ave. Delta Score Uplift	0		Quiz Modules Taken	1		1	1					1	1	1	1		1	1
	Pre-Quiz Scores Std. Deviation	16.6905		Ave. Pre-Quiz Score	37.5		4	2					2	6	4	2		4	6
	Group A Sigma	0		Ave. Post-Quiz Score	37.5		2	4					6	6	2	2		0	8
	T-Test, 1-Tail, Pre vs Post Quiz	0.5		Delta Score, Uplift	0		-2	2					4	0	-2	0		-4	2
	Hake's Normalized Gain g	0		Post-Quiz Scores Std. Dev.	27.1241
	Grade 8, Group B, Statistics	Value		Grade 8, Group B	Ave.		08B01	08B02	08B03	08B04	08B05	08B06	08B07	08B08	08B09	08B10	08B11	08B12	08B13	08B14
	Ave. Delta Score Uplift	-4		Quiz Modules Taken	1			1	1		1	1	1	1		1		1	1	1
	Pre-Quiz Scores Std. Deviation	13.9841		Ave. Pre-Quiz Score	48			4	4		4	6	6	6		6		4	2	6
	Group B Sigma	-0.286039		Ave. Post-Quiz Score	44			4	8		4	4	2	2		6		4	6	4
	T-Test, 1-Tail, Pre vs Post Quiz	0.295305		Delta Score, Uplift	-4			0	4		0	-2	-4	-4		0		0	4	-2
	Hake's Normalized Gain g	-0.0769231		Post-Quiz Scores Std. Dev.	18.3787
	Grade 8, Group A vs B, Quiz 56	Value		Grade 8, Group A vs B, Quiz 56	Value
	T-Test, 1-Tail, A-Pre vs B-Pre	0.00449221		Total Valid Quizzes Group A	6
	T-Test, 1-Tail, A-Post vs B-Post	0.0661708		Total Valid Quizzes Group B	7
	T-Test, 1-Tail, A-Delta vs B-Delta	0.278514		Std Deviation of Delta Scores A	16.7332
	Total Valid Takers Group A, Min 5	6		Std Deviation of Delta Scores B	24.2997
	Total Valid Takers Group B, Min 5	7		Pooled Std Deviation of Delta A&B	21.1979
				Cohen's Number d	-0.293948
	Grade 8, Group A, Statistics	Value		Grade 8, Group A	Ave.		08A01	08A02	08A03	08A04	08A05	08A06	08A07	08A08	08A09	08A10	08A11	08A12	08A13
	Ave. Delta Score Uplift	10		Quiz Modules Taken	1			1				1		1	1			1	1
	Pre-Quiz Scores Std. Deviation	8.16497		Ave. Pre-Quiz Score	56.6667			6				4		6	6			6	6
	Group A Sigma	1.22474		Ave. Post-Quiz Score	66.6667			8				6		8	8			4	6
	T-Test, 1-Tail, Pre vs Post Quiz	0.104692		Delta Score, Uplift	10			2				2		2	2			-2	0
	Hake's Normalized Gain g	0.230769		Post-Quiz Scores Std. Dev.	16.3299
	Grade 8, Group B, Statistics	Value		Grade 8, Group B	Ave.		08B01	08B02	08B03	08B04	08B05	08B06	08B07	08B08	08B09	08B10	08B11	08B12	08B13	08B14
	Ave. Delta Score Uplift	2.85714		Quiz Modules Taken	1						1	1	1	1		1			1	1
	Pre-Quiz Scores Std. Deviation	7.55929		Ave. Pre-Quiz Score	42.8571						4	4	4	4		4			4	6
	Group B Sigma	0.377964		Ave. Post-Quiz Score	45.7143						4	6	8	2		2			2	8
	T-Test, 1-Tail, Pre vs Post Quiz	0.398079		Delta Score, Uplift	2.85714						0	2	4	-2		-2			-2	2
	Hake's Normalized Gain g	0.05		Post-Quiz Scores Std. Dev.	27.6026
	Grade 8, Group A vs B, Quiz 57	Value		Grade 8, Group A vs B, Quiz 57	Value
	T-Test, 1-Tail, A-Pre vs B-Pre	0.12628		Total Valid Quizzes Group A	10
	T-Test, 1-Tail, A-Post vs B-Post	0.429003		Total Valid Quizzes Group B	9
	T-Test, 1-Tail, A-Delta vs B-Delta	0.23866		Std Deviation of Delta Scores A	25.2982
	Total Valid Takers Group A, Min 5	10		Std Deviation of Delta Scores B	22.3607
	Total Valid Takers Group B, Min 5	9		Pooled Std Deviation of Delta A&B	23.9608
				Cohen's Number d	0.357771
	Grade 8, Group A, Statistics	Value		Grade 8, Group A	Ave.		08A01	08A02	08A03	08A04	08A05	08A06	08A07	08A08	08A09	08A10	08A11	08A12	08A13
	Ave. Delta Score Uplift	12		Quiz Modules Taken	1		1	1	1			1	1	1	1	1		1	1
	Pre-Quiz Scores Std. Deviation	21.187		Ave. Pre-Quiz Score	46		4	4	6			4	6	6	4	4		0	8
	Group A Sigma	0.566385		Ave. Post-Quiz Score	58		6	4	10			6	8	8	6	0		4	6
	T-Test, 1-Tail, Pre vs Post Quiz	0.143882		Delta Score, Uplift	12		2	0	4			2	2	2	2	-4		4	-2
	Hake's Normalized Gain g	0.222222		Post-Quiz Scores Std. Dev.	27.4064
	Grade 8, Group B, Statistics	Value		Grade 8, Group B	Ave.		08B01	08B02	08B03	08B04	08B05	08B06	08B07	08B08	08B09	08B10	08B11	08B12	08B13	08B14
	Ave. Delta Score Uplift	20		Quiz Modules Taken	1			1			1	1	1	1	1	1			1	1
	Pre-Quiz Scores Std. Deviation	16.6667		Ave. Pre-Quiz Score	35.5556			4			2	2	2	2	6	6			4	4
	Group B Sigma	1.2		Ave. Post-Quiz Score	55.5556			6			6	6	2	0	10	8			4	8
	T-Test, 1-Tail, Pre vs Post Quiz	0.0548873		Delta Score, Uplift	20			2			4	4	0	-2	4	2			0	4
	Hake's Normalized Gain g	0.310345		Post-Quiz Scores Std. Dev.	31.2694
	Grade 9, Group A vs B, Quiz 29	Value		Grade 9, Group A vs B, Quiz 29	Value
	T-Test, 1-Tail, A-Pre vs B-Pre	0.308305		Total Valid Quizzes Group A	12
	T-Test, 1-Tail, A-Post vs B-Post	0.192988		Total Valid Quizzes Group B	7
	T-Test, 1-Tail, A-Delta vs B-Delta	0.180276		Std Deviation of Delta Scores A	33.0289
	Total Valid Takers Group A, Min 5	12		Std Deviation of Delta Scores B	29.9205
	Total Valid Takers Group B, Min 5	7		Pooled Std Deviation of Delta A&B	31.9664
				Cohen's Number d	0.477455
	Grade 9, Group A, Statistics	Value		Grade 9, Group A	Ave.		09A01	09A02	09A03	09A04	09A05	09A06	09A07	09A08	09A09	09A10	09A11	09A12	09A13	09A14	09A15	09A16	09A17	09A18	09A19
	Ave. Delta Score Uplift	0		Quiz Modules Taken	1		1	1	1		1		1			1	1	1		1	1	1		1
	Pre-Quiz Scores Std. Deviation	21.4617		Ave. Pre-Quiz Score	53.3333		4	4	4		6		4			2	6	8		6	4	10		6
	Group A Sigma	0		Ave. Post-Quiz Score	53.3333		6	2	8		6		8			6	4	2		8	4	6		4
	T-Test, 1-Tail, Pre vs Post Quiz	0.5		Delta Score, Uplift	0		2	-2	4		0		4			4	-2	-6		2	0	-4		-2
	Hake's Normalized Gain g	0		Post-Quiz Scores Std. Dev.	21.4617
	Grade 9, Group B, Statistics	Value		Grade 9, Group B	Ave.		09B01	09B02	09B03	09B04	09B05	09B06	09B07	09B08	09B09	09B10	09B11	09B12	09B13	09B14	09B15	09B16	09B17	09B18
	Ave. Delta Score Uplift	14.2857		Quiz Modules Taken	1		1	1								1	1	1	1	1
	Pre-Quiz Scores Std. Deviation	15.7359		Ave. Pre-Quiz Score	48.5714		6	6								2	4	6	4	6
	Group B Sigma	0.907841		Ave. Post-Quiz Score	62.8571		2	8								8	4	8	6	8
	T-Test, 1-Tail, Pre vs Post Quiz	0.108085		Delta Score, Uplift	14.2857		-4	2								6	0	2	2	2
	Hake's Normalized Gain g	0.277778		Post-Quiz Scores Std. Dev.	24.2997
	Grade 9, Group A vs B, Quiz 30	Value		Grade 9, Group A vs B, Quiz 30	Value
	T-Test, 1-Tail, A-Pre vs B-Pre	0.309157		Total Valid Quizzes Group A	9
	T-Test, 1-Tail, A-Post vs B-Post	0.138858		Total Valid Quizzes Group B	11
	T-Test, 1-Tail, A-Delta vs B-Delta	0.18866		Std Deviation of Delta Scores A	21.8581
	Total Valid Takers Group A, Min 5	9		Std Deviation of Delta Scores B	26.968
	Total Valid Takers Group B, Min 5	11		Pooled Std Deviation of Delta A&B	24.8271
				Cohen's Number d	0.374555
	Grade 9, Group A, Statistics	Value		Grade 9, Group A	Ave.		09A01	09A02	09A03	09A04	09A05	09A06	09A07	09A08	09A09	09A10	09A11	09A12	09A13	09A14	09A15	09A16	09A17	09A18	09A19
	Ave. Delta Score Uplift	4.44444		Quiz Modules Taken	1			1	1						1	1	1	1		1	1		1
	Pre-Quiz Scores Std. Deviation	10.5409		Ave. Pre-Quiz Score	48.8889			6	6						6	4	4	6		4	4		4
	Group A Sigma	0.421637		Ave. Post-Quiz Score	53.3333			2	8						8	6	2	8		4	4		6
	T-Test, 1-Tail, Pre vs Post Quiz	0.311941		Delta Score, Uplift	4.44444			-4	2						2	2	-2	2		0	0		2
	Hake's Normalized Gain g	0.0869565		Post-Quiz Scores Std. Dev.	24.4949
	Grade 9, Group B, Statistics	Value		Grade 9, Group B	Ave.		09B01	09B02	09B03	09B04	09B05	09B06	09B07	09B08	09B09	09B10	09B11	09B12	09B13	09B14	09B15	09B16	09B17	09B18
	Ave. Delta Score Uplift	14.5455		Quiz Modules Taken	1		1	1	1	1		1	1		1	1			1	1		1
	Pre-Quiz Scores Std. Deviation	20.5382		Ave. Pre-Quiz Score	52.7273		6	6	8	4		6	2		8	2			6	4		6
	Group B Sigma	0.708214		Ave. Post-Quiz Score	67.2727		6	0	10	6		10	4		10	6			8	6		8
	T-Test, 1-Tail, Pre vs Post Quiz	0.0998948		Delta Score, Uplift	14.5455		0	-6	2	2		4	2		2	4			2	2		2
	Hake's Normalized Gain g	0.307692		Post-Quiz Scores Std. Dev.	30.0303
	Grade 9, Group A vs B, Quiz 31	Value		Grade 9, Group A vs B, Quiz 31	Value
	T-Test, 1-Tail, A-Pre vs B-Pre	0.344251		Total Valid Quizzes Group A	10
	T-Test, 1-Tail, A-Post vs B-Post	0.421272		Total Valid Quizzes Group B	7
	T-Test, 1-Tail, A-Delta vs B-Delta	0.304767		Std Deviation of Delta Scores A	22.7058
	Total Valid Takers Group A, Min 5	10		Std Deviation of Delta Scores B	36.2531
	Total Valid Takers Group B, Min 5	7		Pooled Std Deviation of Delta A&B	28.8972
				Cohen's Number d	-0.204909
	Grade 9, Group A, Statistics	Value		Grade 9, Group A	Ave.		09A01	09A02	09A03	09A04	09A05	09A06	09A07	09A08	09A09	09A10	09A11	09A12	09A13	09A14	09A15	09A16	09A17	09A18	09A19
	Ave. Delta Score Uplift	16		Quiz Modules Taken	1			1	1	1		1			1		1		1	1	1			1
	Pre-Quiz Scores Std. Deviation	18.3787		Ave. Pre-Quiz Score	44			4	6	6		4			6		2		6	2	2			6
	Group A Sigma	0.870572		Ave. Post-Quiz Score	60			4	4	8		10			8		2		8	2	6			8
	T-Test, 1-Tail, Pre vs Post Quiz	0.0754752		Delta Score, Uplift	16			0	-2	2		6			2		0		2	0	4			2
	Hake's Normalized Gain g	0.285714		Post-Quiz Scores Std. Dev.	28.2843
	Grade 9, Group B, Statistics	Value		Grade 9, Group B	Ave.		09B01	09B02	09B03	09B04	09B05	09B06	09B07	09B08	09B09	09B10	09B11	09B12	09B13	09B14	09B15	09B16	09B17	09B18
	Ave. Delta Score Uplift	8.57143		Quiz Modules Taken	1			1		1			1		1	1	1						1
	Pre-Quiz Scores Std. Deviation	27.9455		Ave. Pre-Quiz Score	48.5714			6		6			6		8	2	0						6
	Group B Sigma	0.306719		Ave. Post-Quiz Score	57.1429			0		6			8		8	4	6						8
	T-Test, 1-Tail, Pre vs Post Quiz	0.292787		Delta Score, Uplift	8.57143			-6		0			2		0	2	6						2
	Hake's Normalized Gain g	0.166667		Post-Quiz Scores Std. Dev.	29.277
	Grade 9, Group A vs B, Quiz 32	Value		Grade 9, Group A vs B, Quiz 32	Value
	T-Test, 1-Tail, A-Pre vs B-Pre	0.128418		Total Valid Quizzes Group A	12
	T-Test, 1-Tail, A-Post vs B-Post	0.0717737		Total Valid Quizzes Group B	8
	T-Test, 1-Tail, A-Delta vs B-Delta	0.396253		Std Deviation of Delta Scores A	26.7423
	Total Valid Takers Group A, Min 5	12		Std Deviation of Delta Scores B	28.2843
	Total Valid Takers Group B, Min 5	8		Pooled Std Deviation of Delta A&B	27.3523
				Cohen's Number d	-0.117851
	Grade 9, Group A, Statistics	Value		Grade 9, Group A	Ave.		09A01	09A02	09A03	09A04	09A05	09A06	09A07	09A08	09A09	09A10	09A11	09A12	09A13	09A14	09A15	09A16	09A17	09A18	09A19
	Ave. Delta Score Uplift	3.33333		Quiz Modules Taken	1			1					1	1	1		1	1	1	1	1	1	1		1
	Pre-Quiz Scores Std. Deviation	21.1058		Ave. Pre-Quiz Score	45			2					2	6	6		2	8	6	2	4	6	6		4
	Group A Sigma	0.157935		Ave. Post-Quiz Score	48.3333			4					6	2	6		4	4	6	4	4	6	4		8
	T-Test, 1-Tail, Pre vs Post Quiz	0.333048		Delta Score, Uplift	3.33333			2					4	-4	0		2	-4	0	2	0	0	-2		4
	Hake's Normalized Gain g	0.0606061		Post-Quiz Scores Std. Dev.	15.8592
	Grade 9, Group B, Statistics	Value		Grade 9, Group B	Ave.		09B01	09B02	09B03	09B04	09B05	09B06	09B07	09B08	09B09	09B10	09B11	09B12	09B13	09B14	09B15	09B16	09B17	09B18
	Ave. Delta Score Uplift	0		Quiz Modules Taken	1			1		1		1	1			1	1				1		1
	Pre-Quiz Scores Std. Deviation	14.1421		Ave. Pre-Quiz Score	35			4		2		4	6			2	2				4		4
	Group B Sigma	0		Ave. Post-Quiz Score	35			0		2		4	4			2	8				4		4
	T-Test, 1-Tail, Pre vs Post Quiz	0.5		Delta Score, Uplift	0			-4		0		0	-2			0	6				0		0
	Hake's Normalized Gain g	0		Post-Quiz Scores Std. Dev.	23.2993
	Grade 9, Group A vs B, Quiz 33	Value		Grade 9, Group A vs B, Quiz 33	Value
	T-Test, 1-Tail, A-Pre vs B-Pre	0.323001		Total Valid Quizzes Group A	14
	T-Test, 1-Tail, A-Post vs B-Post	0.466443		Total Valid Quizzes Group B	8
	T-Test, 1-Tail, A-Delta vs B-Delta	0.407802		Std Deviation of Delta Scores A	27.8536
	Total Valid Takers Group A, Min 5	14		Std Deviation of Delta Scores B	26.1861
	Total Valid Takers Group B, Min 5	8		Pooled Std Deviation of Delta A&B	27.2816
				Cohen's Number d	0.109109
	Grade 9, Group A, Statistics	Value		Grade 9, Group A	Ave.		09A01	09A02	09A03	09A04	09A05	09A06	09A07	09A08	09A09	09A10	09A11	09A12	09A13	09A14	09A15	09A16	09A17	09A18	09A19
	Ave. Delta Score Uplift	-12.8571		Quiz Modules Taken	1			1		1	1		1	1	1	1	1	1	1	1	1		1		1
	Pre-Quiz Scores Std. Deviation	15.1186		Ave. Pre-Quiz Score	48.5714			4		6	4		6	6	4	6	2	8	6	4	4		4		4
	Group A Sigma	-0.85042		Ave. Post-Quiz Score	35.7143			4		4	8		6	0	4	2	2	2	4	4	2		2		6
	T-Test, 1-Tail, Pre vs Post Quiz	0.0372582		Delta Score, Uplift	-12.8571			0		-2	4		0	-6	0	-4	0	-6	-2	0	-2		-2		2
	Hake's Normalized Gain g	-0.25		Post-Quiz Scores Std. Dev.	21.018
	Grade 9, Group B, Statistics	Value		Grade 9, Group B	Ave.		09B01	09B02	09B03	09B04	09B05	09B06	09B07	09B08	09B09	09B10	09B11	09B12	09B13	09B14	09B15	09B16	09B17	09B18
	Ave. Delta Score Uplift	-10		Quiz Modules Taken	1			1					1		1	1	1				1	1	1
	Pre-Quiz Scores Std. Deviation	20.702		Ave. Pre-Quiz Score	45			4					4		8	2	4				2	6	6
	Group B Sigma	-0.483046		Ave. Post-Quiz Score	35			6					2		4	4	2				4	4	2
	T-Test, 1-Tail, Pre vs Post Quiz	0.139109		Delta Score, Uplift	-10			2					-2		-4	2	-2				2	-2	-4
	Hake's Normalized Gain g	-0.181818		Post-Quiz Scores Std. Dev.	14.1421
	Grade 9, Group A vs B, Quiz 35	Value		Grade 9, Group A vs B, Quiz 35	Value
	T-Test, 1-Tail, A-Pre vs B-Pre	0.485045		Total Valid Quizzes Group A	12
	T-Test, 1-Tail, A-Post vs B-Post	0.0418424		Total Valid Quizzes Group B	5
	T-Test, 1-Tail, A-Delta vs B-Delta	0.0338362		Std Deviation of Delta Scores A	21.1058
	Total Valid Takers Group A, Min 5	12		Std Deviation of Delta Scores B	16.7332
	Total Valid Takers Group B, Min 5	5		Pooled Std Deviation of Delta A&B	20.0333
				Cohen's Number d	1.25499
	Grade 9, Group A, Statistics	Value		Grade 9, Group A	Ave.		09A01	09A02	09A03	09A04	09A05	09A06	09A07	09A08	09A09	09A10	09A11	09A12	09A13	09A14	09A15	09A16	09A17	09A18	09A19
	Ave. Delta Score Uplift	-5		Quiz Modules Taken	1			1		1			1	1	1	1	1		1	1	1		1		1
	Pre-Quiz Scores Std. Deviation	15.8592		Ave. Pre-Quiz Score	48.3333			4		6			6	6	6	6	2		4	2	4		6		6
	Group A Sigma	-0.315274		Ave. Post-Quiz Score	43.3333			4		4			4	4	8	4	4		8	2	2		4		4
	T-Test, 1-Tail, Pre vs Post Quiz	0.244004		Delta Score, Uplift	-5			0		-2			-2	-2	2	-2	2		4	0	-2		-2		-2
	Hake's Normalized Gain g	-0.0967742		Post-Quiz Scores Std. Dev.	18.7487
	Grade 9, Group B, Statistics	Value		Grade 9, Group B	Ave.		09B01	09B02	09B03	09B04	09B05	09B06	09B07	09B08	09B09	09B10	09B11	09B12	09B13	09B14	09B15	09B16	09B17	09B18
	Ave. Delta Score Uplift	16		Quiz Modules Taken	1			1					1	1			1	1
	Pre-Quiz Scores Std. Deviation	17.8885		Ave. Pre-Quiz Score	48			2					4	6			6	6
	Group B Sigma	0.894427		Ave. Post-Quiz Score	64			2					8	8			6	8
	T-Test, 1-Tail, Pre vs Post Quiz	0.145336		Delta Score, Uplift	16			0					4	2			0	2
	Hake's Normalized Gain g	0.307692		Post-Quiz Scores Std. Dev.	26.0768
	Grade 9, Group A vs B, Quiz 38	Value		Grade 9, Group A vs B, Quiz 38	Value
	T-Test, 1-Tail, A-Pre vs B-Pre	0.316439		Total Valid Quizzes Group A	10
	T-Test, 1-Tail, A-Post vs B-Post	0.122391		Total Valid Quizzes Group B	7
	T-Test, 1-Tail, A-Delta vs B-Delta	0.063826		Std Deviation of Delta Scores A	25.7337
	Total Valid Takers Group A, Min 5	10		Std Deviation of Delta Scores B	21.3809
	Total Valid Takers Group B, Min 5	7		Pooled Std Deviation of Delta A&B	24.0871
				Cohen's Number d	0.895325
	Grade 9, Group A, Statistics	Value		Grade 9, Group A	Ave.		09A01	09A02	09A03	09A04	09A05	09A06	09A07	09A08	09A09	09A10	09A11	09A12	09A13	09A14	09A15	09A16	09A17	09A18	09A19
	Ave. Delta Score Uplift	-2		Quiz Modules Taken	1			1		1	1				1		1	1	1	1	1	1
	Pre-Quiz Scores Std. Deviation	14.1421		Ave. Pre-Quiz Score	50			6		6	4				4		4	6	6	2	6	6
	Group A Sigma	-0.141421		Ave. Post-Quiz Score	48			4		4	8				6		2	4	8	4	2	6
	T-Test, 1-Tail, Pre vs Post Quiz	0.404321		Delta Score, Uplift	-2			-2		-2	4				2		-2	-2	2	2	-4	0
	Hake's Normalized Gain g	-0.04		Post-Quiz Scores Std. Dev.	21.4994
	Grade 9, Group B, Statistics	Value		Grade 9, Group B	Ave.		09B01	09B02	09B03	09B04	09B05	09B06	09B07	09B08	09B09	09B10	09B11	09B12	09B13	09B14	09B15	09B16	09B17	09B18
	Ave. Delta Score Uplift	17.1429		Quiz Modules Taken	1			1				1			1		1				1	1	1
	Pre-Quiz Scores Std. Deviation	22.2539		Ave. Pre-Quiz Score	45.7143			0				6			6		4				6	6	4
	Group B Sigma	0.770329		Ave. Post-Quiz Score	62.8571			2				8			10		4				4	8	8
	T-Test, 1-Tail, Pre vs Post Quiz	0.120531		Delta Score, Uplift	17.1429			2				2			4		0				-2	2	4
	Hake's Normalized Gain g	0.315789		Post-Quiz Scores Std. Dev.	29.277
	Grade 9, Group A vs B, Quiz 39	Value		Grade 9, Group A vs B, Quiz 39	Value
	T-Test, 1-Tail, A-Pre vs B-Pre	0.208586		Total Valid Quizzes Group A	14
	T-Test, 1-Tail, A-Post vs B-Post	0.490765		Total Valid Quizzes Group B	5
	T-Test, 1-Tail, A-Delta vs B-Delta	0.258241		Std Deviation of Delta Scores A	24.0878
	Total Valid Takers Group A, Min 5	14		Std Deviation of Delta Scores B	38.4708
	Total Valid Takers Group B, Min 5	5		Pooled Std Deviation of Delta A&B	28.1413
				Cohen's Number d	0.252511
	Grade 9, Group A, Statistics	Value		Grade 9, Group A	Ave.		09A01	09A02	09A03	09A04	09A05	09A06	09A07	09A08	09A09	09A10	09A11	09A12	09A13	09A14	09A15	09A16	09A17	09A18	09A19
	Ave. Delta Score Uplift	-5.71429		Quiz Modules Taken	1			1		1	1	1	1	1	1	1	1	1	1	1	1	1
	Pre-Quiz Scores Std. Deviation	21.4322		Ave. Pre-Quiz Score	41.4286			0		4	2	2	2	2	6	6	6	6	6	6	4	6
	Group A Sigma	-0.266621		Ave. Post-Quiz Score	35.7143			0		6	4	6	2	2	2	4	2	6	6	4	0	6
	T-Test, 1-Tail, Pre vs Post Quiz	0.248426		Delta Score, Uplift	-5.71429			0		2	2	4	0	0	-4	-2	-4	0	0	-2	-4	0
	Hake's Normalized Gain g	-0.097561		Post-Quiz Scores Std. Dev.	22.4343
	Grade 9, Group B, Statistics	Value		Grade 9, Group B	Ave.		09B01	09B02	09B03	09B04	09B05	09B06	09B07	09B08	09B09	09B10	09B11	09B12	09B13	09B14	09B15	09B16	09B17	09B18
	Ave. Delta Score Uplift	4		Quiz Modules Taken	1			1									1	1			1		1
	Pre-Quiz Scores Std. Deviation	22.8035		Ave. Pre-Quiz Score	32			0									2	4			6		4
	Group B Sigma	0.175412		Ave. Post-Quiz Score	36			2									8	4			2		2
	T-Test, 1-Tail, Pre vs Post Quiz	0.401386		Delta Score, Uplift	4			2									6	0			-4		-2
	Hake's Normalized Gain g	0.0588235		Post-Quiz Scores Std. Dev.	26.0768
	Grade 9, Group A vs B, Quiz 40	Value		Grade 9, Group A vs B, Quiz 40	Value
	T-Test, 1-Tail, A-Pre vs B-Pre	0.435235		Total Valid Quizzes Group A	9
	T-Test, 1-Tail, A-Post vs B-Post	0.317469		Total Valid Quizzes Group B	6
	T-Test, 1-Tail, A-Delta vs B-Delta	0.379537		Std Deviation of Delta Scores A	29.6273
	Total Valid Takers Group A, Min 5	9		Std Deviation of Delta Scores B	21.9089
	Total Valid Takers Group B, Min 5	6		Pooled Std Deviation of Delta A&B	26.9219
				Cohen's Number d	-0.20286
	Grade 9, Group A, Statistics	Value		Grade 9, Group A	Ave.		09A01	09A02	09A03	09A04	09A05	09A06	09A07	09A08	09A09	09A10	09A11	09A12	09A13	09A14	09A15	09A16	09A17	09A18	09A19
	Ave. Delta Score Uplift	4.44444		Quiz Modules Taken	1		1		1			1	1	1			1	1		1	1
	Pre-Quiz Scores Std. Deviation	25.3859		Ave. Pre-Quiz Score	42.2222		2		4			6	2	4			6	0		6	8
	Group A Sigma	0.175075		Ave. Post-Quiz Score	46.6667		4		8			6	2	4			6	4		0	8
	T-Test, 1-Tail, Pre vs Post Quiz	0.360445		Delta Score, Uplift	4.44444		2		4			0	0	0			0	4		-6	0
	Hake's Normalized Gain g	0.0769231		Post-Quiz Scores Std. Dev.	26.4575
	Grade 9, Group B, Statistics	Value		Grade 9, Group B	Ave.		09B01	09B02	09B03	09B04	09B05	09B06	09B07	09B08	09B09	09B10	09B11	09B12	09B13	09B14	09B15	09B16	09B17	09B18
	Ave. Delta Score Uplift	0		Quiz Modules Taken	1			1									1	1			1	1	1
	Pre-Quiz Scores Std. Deviation	25.2982		Ave. Pre-Quiz Score	40			0									4	6			2	6	6
	Group B Sigma	0		Ave. Post-Quiz Score	40			0									2	6			6	4	6
	T-Test, 1-Tail, Pre vs Post Quiz	0.5		Delta Score, Uplift	0			0									-2	0			4	-2	0
	Hake's Normalized Gain g	0		Post-Quiz Scores Std. Dev.	25.2982
	Grade 9, Group A vs B, Quiz 42	Value		Grade 9, Group A vs B, Quiz 42	Value
	T-Test, 1-Tail, A-Pre vs B-Pre	0.0980481		Total Valid Quizzes Group A	10
	T-Test, 1-Tail, A-Post vs B-Post	0.0397625		Total Valid Quizzes Group B	5
	T-Test, 1-Tail, A-Delta vs B-Delta	0.344555		Std Deviation of Delta Scores A	27.0801
	Total Valid Takers Group A, Min 5	10		Std Deviation of Delta Scores B	26.0768
	Total Valid Takers Group B, Min 5	5		Pooled Std Deviation of Delta A&B	26.7754
				Cohen's Number d	0.230089
	Grade 9, Group A, Statistics	Value		Grade 9, Group A	Ave.		09A01	09A02	09A03	09A04	09A05	09A06	09A07	09A08	09A09	09A10	09A11	09A12	09A13	09A14	09A15	09A16	09A17	09A18	09A19
	Ave. Delta Score Uplift	10		Quiz Modules Taken	1					1	1		1	1	1			1	1	1	1	1
	Pre-Quiz Scores Std. Deviation	16.8655		Ave. Pre-Quiz Score	28					2	2		2	2	2			6	2	2	2	6
	Group A Sigma	0.592927		Ave. Post-Quiz Score	38					4	8		2	2	4			4	4	4	4	2
	T-Test, 1-Tail, Pre vs Post Quiz	0.10489		Delta Score, Uplift	10					2	6		0	0	2			-2	2	2	2	-4
	Hake's Normalized Gain g	0.138889		Post-Quiz Scores Std. Dev.	17.5119
	Grade 9, Group B, Statistics	Value		Grade 9, Group B	Ave.		09B01	09B02	09B03	09B04	09B05	09B06	09B07	09B08	09B09	09B10	09B11	09B12	09B13	09B14	09B15	09B16	09B17	09B18
	Ave. Delta Score Uplift	16		Quiz Modules Taken	1							1			1		1	1					1
	Pre-Quiz Scores Std. Deviation	14.1421		Ave. Pre-Quiz Score	40							4			6		2	4					4
	Group B Sigma	1.13137		Ave. Post-Quiz Score	56							6			6		8	4					4
	T-Test, 1-Tail, Pre vs Post Quiz	0.0705566		Delta Score, Uplift	16							2			0		6	0					0
	Hake's Normalized Gain g	0.266667		Post-Quiz Scores Std. Dev.	16.7332
	Grade 9, Group A vs B, Quiz 45	Value		Grade 9, Group A vs B, Quiz 45	Value
	T-Test, 1-Tail, A-Pre vs B-Pre	0.114444		Total Valid Quizzes Group A	9
	T-Test, 1-Tail, A-Post vs B-Post	0.00444955		Total Valid Quizzes Group B	9
	T-Test, 1-Tail, A-Delta vs B-Delta	0.0284917		Std Deviation of Delta Scores A	21.8581
	Total Valid Takers Group A, Min 5	9		Std Deviation of Delta Scores B	19.4365
	Total Valid Takers Group B, Min 5	9		Pooled Std Deviation of Delta A&B	20.6828
				Cohen's Number d	1.02899
	Grade 9, Group A, Statistics	Value		Grade 9, Group A	Ave.		09A01	09A02	09A03	09A04	09A05	09A06	09A07	09A08	09A09	09A10	09A11	09A12	09A13	09A14	09A15	09A16	09A17	09A18	09A19
	Ave. Delta Score Uplift	-4.44444		Quiz Modules Taken	1					1	1	1	1	1	1			1		1	1
	Pre-Quiz Scores Std. Deviation	12.0185		Ave. Pre-Quiz Score	42.2222					4	6	4	6	4	4			4		2	4
	Group A Sigma	-0.3698		Ave. Post-Quiz Score	37.7778					8	6	4	2	4	2			4		2	2
	T-Test, 1-Tail, Pre vs Post Quiz	0.295145		Delta Score, Uplift	-4.44444					4	0	0	-4	0	-2			0		0	-2
	Hake's Normalized Gain g	-0.0769231		Post-Quiz Scores Std. Dev.	21.0819
	Grade 9, Group B, Statistics	Value		Grade 9, Group B	Ave.		09B01	09B02	09B03	09B04	09B05	09B06	09B07	09B08	09B09	09B10	09B11	09B12	09B13	09B14	09B15	09B16	09B17	09B18
	Ave. Delta Score Uplift	15.5556		Quiz Modules Taken	1					1		1		1	1		1	1			1	1	1
	Pre-Quiz Scores Std. Deviation	10.5409		Ave. Pre-Quiz Score	48.8889					6		4		6	6		4	4			4	4	6
	Group B Sigma	1.47573		Ave. Post-Quiz Score	64.4444					4		8		8	8		6	6			4	8	6
	T-Test, 1-Tail, Pre vs Post Quiz	0.0154566		Delta Score, Uplift	15.5556					-2		4		2	2		2	2			0	4	0
	Hake's Normalized Gain g	0.304348		Post-Quiz Scores Std. Dev.	16.6667
	Grade 9, Group A vs B, Quiz 46	Value		Grade 9, Group A vs B, Quiz 46	Value
	T-Test, 1-Tail, A-Pre vs B-Pre	0.165025		Total Valid Quizzes Group A	6
	T-Test, 1-Tail, A-Post vs B-Post	0.00543539		Total Valid Quizzes Group B	7
	T-Test, 1-Tail, A-Delta vs B-Delta	0.0169907		Std Deviation of Delta Scores A	23.3809
	Total Valid Takers Group A, Min 5	6		Std Deviation of Delta Scores B	33.5233
	Total Valid Takers Group B, Min 5	7		Pooled Std Deviation of Delta A&B	29.3508
				Cohen's Number d	1.179
	Grade 9, Group A, Statistics	Value		Grade 9, Group A	Ave.		09A01	09A02	09A03	09A04	09A05	09A06	09A07	09A08	09A09	09A10	09A11	09A12	09A13	09A14	09A15	09A16	09A17	09A18	09A19
	Ave. Delta Score Uplift	-16.6667		Quiz Modules Taken	1						1		1	1	1			1	1
	Pre-Quiz Scores Std. Deviation	19.6638		Ave. Pre-Quiz Score	43.3333						6		6	2	2			6	4
	Group A Sigma	-0.847579		Ave. Post-Quiz Score	26.6667						2		2	4	2			4	2
	T-Test, 1-Tail, Pre vs Post Quiz	0.0479532		Delta Score, Uplift	-16.6667						-4		-4	2	0			-2	-2
	Hake's Normalized Gain g	-0.294118		Post-Quiz Scores Std. Dev.	10.328
	Grade 9, Group B, Statistics	Value		Grade 9, Group B	Ave.		09B01	09B02	09B03	09B04	09B05	09B06	09B07	09B08	09B09	09B10	09B11	09B12	09B13	09B14	09B15	09B16	09B17	09B18
	Ave. Delta Score Uplift	22.8571		Quiz Modules Taken	1							1		1	1			1			1	1	1
	Pre-Quiz Scores Std. Deviation	19.0238		Ave. Pre-Quiz Score	54.2857							6		4	6			2			6	8	6
	Group B Sigma	1.2015		Ave. Post-Quiz Score	77.1429							10		10	10			2			2	10	10
	T-Test, 1-Tail, Pre vs Post Quiz	0.0945001		Delta Score, Uplift	22.8571							4		6	4			0			-4	2	4
	Hake's Normalized Gain g	0.5		Post-Quiz Scores Std. Dev.	39.036
	Grade 9, Group A vs B, Quiz 48	Value		Grade 9, Group A vs B, Quiz 48	Value
	T-Test, 1-Tail, A-Pre vs B-Pre	0.241844		Total Valid Quizzes Group A	10
	T-Test, 1-Tail, A-Post vs B-Post	0.2447		Total Valid Quizzes Group B	7
	T-Test, 1-Tail, A-Delta vs B-Delta	0.480365		Std Deviation of Delta Scores A	21.4994
	Total Valid Takers Group A, Min 5	10		Std Deviation of Delta Scores B	25.4484
	Total Valid Takers Group B, Min 5	7		Pooled Std Deviation of Delta A&B	23.1599
				Cohen's Number d	0.0224544
	Grade 9, Group A, Statistics	Value		Grade 9, Group A	Ave.		09A01	09A02	09A03	09A04	09A05	09A06	09A07	09A08	09A09	09A10	09A11	09A12	09A13	09A14	09A15	09A16	09A17	09A18	09A19
	Ave. Delta Score Uplift	8		Quiz Modules Taken	1					1	1	1	1	1	1			1	1	1	1
	Pre-Quiz Scores Std. Deviation	13.9841		Ave. Pre-Quiz Score	28					6	2	2	4	2	2			4	2	2	2
	Group A Sigma	0.572078		Ave. Post-Quiz Score	36					4	4	0	4	4	6			4	6	2	2
	T-Test, 1-Tail, Pre vs Post Quiz	0.143882		Delta Score, Uplift	8					-2	2	-2	0	2	4			0	4	0	0
	Hake's Normalized Gain g	0.111111		Post-Quiz Scores Std. Dev.	18.3787
	Grade 9, Group B, Statistics	Value		Grade 9, Group B	Ave.		09B01	09B02	09B03	09B04	09B05	09B06	09B07	09B08	09B09	09B10	09B11	09B12	09B13	09B14	09B15	09B16	09B17	09B18
	Ave. Delta Score Uplift	8.57143		Quiz Modules Taken	1							1		1			1	1			1	1	1
	Pre-Quiz Scores Std. Deviation	22.2539		Ave. Pre-Quiz Score	34.2857							4		6			6	0			2	2	4
	Group B Sigma	0.385164		Ave. Post-Quiz Score	42.8571							4		8			4	4			6	2	2
	T-Test, 1-Tail, Pre vs Post Quiz	0.238274		Delta Score, Uplift	8.57143							0		2			-2	4			4	0	-2
	Hake's Normalized Gain g	0.130435		Post-Quiz Scores Std. Dev.	21.3809
	Grade 9, Group A vs B, Signficiant	Value		Grade 9, Group A vs B, Quiz 35, Significant	Value
	T-Test, 1-Tail, A-Pre vs B-Pre	0.254838		Total Valid Quizzes Group A	9
	T-Test, 1-Tail, A-Post vs B-Post	0.0172425		Total Valid Quizzes Group B	7
	T-Test, 1-Tail, A-Delta vs B-Delta	0.0264395		Std Deviation of Delta Scores A	22.1149
	Total Valid Takers Group A, Min 5	9		Std Deviation of Delta Scores B	23.231
	Total Valid Takers Group B, Min 5	7		Pooled Std Deviation of Delta A&B	23.3556
				Cohen's Number d	1.15433
	Grade 9, Group A, Statistics	Value		Grade 9, Group A	Ave.
	Ave. Delta Score Uplift	-8.7037		Quiz Modules Taken	1
	Pre-Quiz Scores Std. Deviation	15.8472		Ave. Pre-Quiz Score	44.6296
	Group A Sigma	-0.510884		Ave. Post-Quiz Score	35.9259
	T-Test, 1-Tail, Pre vs Post Quiz	0.195701		Delta Score, Uplift	-8.7037
	Hake's Normalized Gain g	-0.155938		Post-Quiz Scores Std. Dev.	16.7195
	Grade 9, Group B, Statistics	Value		Grade 9, Group B	Ave.
	Ave. Delta Score Uplift	18.1376		Quiz Modules Taken	1
	Pre-Quiz Scores Std. Deviation	15.8178		Ave. Pre-Quiz Score	50.3915
	Group B Sigma	1.19055		Ave. Post-Quiz Score	68.5291
	T-Test, 1-Tail, Pre vs Post Quiz	0.0850974		Delta Score, Uplift	18.1376
	Hake's Normalized Gain g	0.37068		Post-Quiz Scores Std. Dev.	27.2598
	Grade 9, Group A vs B, Signficiant	Value		Grade 9, Group A vs B, Quiz 35, Significant	Value
	T-Test, 1-Tail, A-Pre vs B-Pre	0.270238		Total Valid Quizzes Group A	9.25
	T-Test, 1-Tail, A-Post vs B-Post	0.0435297		Total Valid Quizzes Group B	7
	T-Test, 1-Tail, A-Delta vs B-Delta	0.0357862		Std Deviation of Delta Scores A	23.0196
	Total Valid Takers Group A, Min 5	9.25		Std Deviation of Delta Scores B	22.7685
	Total Valid Takers Group B, Min 5	7		Pooled Std Deviation of Delta A&B	23.5385
				Cohen's Number d	1.08958
	Grade 9, Group A, Statistics	Value		Grade 9, Group A	Ave.
	Ave. Delta Score Uplift	-7.02778		Quiz Modules Taken	1
	Pre-Quiz Scores Std. Deviation	15.4209		Ave. Pre-Quiz Score	45.9722
	Group A Sigma	-0.418519		Ave. Post-Quiz Score	38.9444
	T-Test, 1-Tail, Pre vs Post Quiz	0.247856		Delta Score, Uplift	-7.02778
	Hake's Normalized Gain g	-0.126954		Post-Quiz Scores Std. Dev.	17.9145
	Grade 9, Group B, Statistics	Value		Grade 9, Group B	Ave.
	Ave. Delta Score Uplift	17.8889		Quiz Modules Taken	1
	Pre-Quiz Scores Std. Deviation	17.4268		Ave. Pre-Quiz Score	49.2222
	Group B Sigma	1.0855		Ave. Post-Quiz Score	67.1111
	T-Test, 1-Tail, Pre vs Post Quiz	0.0939559		Delta Score, Uplift	17.8889
	Hake's Normalized Gain g	0.356957		Post-Quiz Scores Std. Dev.	27.7641
	Grade 10, Group A vs B, Quiz 34	Value		Grade 10, Group A vs B, Quiz 34	Value
	T-Test, 1-Tail, A-Pre vs B-Pre	0.45623		Total Valid Quizzes Group A	5
	T-Test, 1-Tail, A-Post vs B-Post	0.153879		Total Valid Quizzes Group B	6
	T-Test, 1-Tail, A-Delta vs B-Delta	0.19742		Std Deviation of Delta Scores A	30.3315
	Total Valid Takers Group A, Min 5	5		Std Deviation of Delta Scores B	24.2212
	Total Valid Takers Group B, Min 5	6		Pooled Std Deviation of Delta A&B	27.1075
				Cohen's Number d	-0.60553
	Grade 10, Group A, Statistics	Value		Grade 10, Group A	Ave.		10A01	10A02	10A03	10A04	10A05	10A06	10A07	10A08	10A09	10A10	10A11	10A12	10A13	10A14	10A15	10A16
	Ave. Delta Score Uplift	8		Quiz Modules Taken	1						1		1			1			1	1
	Pre-Quiz Scores Std. Deviation	26.8328		Ave. Pre-Quiz Score	52						4		8			4			2	8
	Group A Sigma	0.298142		Ave. Post-Quiz Score	60						6		4			6			6	8
	T-Test, 1-Tail, Pre vs Post Quiz	0.285811		Delta Score, Uplift	8						2		-4			2			4	0
	Hake's Normalized Gain g	0.166667		Post-Quiz Scores Std. Dev.	14.1421
	Grade 10, Group B, Statistics	Value		Grade 10, Group B	Ave.		10B01	10B02	10B03	10B04	10B05	10B06	10B07	10B08	10B09	10B10	10B11	10B12	10B13	10B14	10B15	10B16	10B17
	Ave. Delta Score Uplift	-6.66667		Quiz Modules Taken	1			1		1		1		1							1		1
	Pre-Quiz Scores Std. Deviation	10.328		Ave. Pre-Quiz Score	53.3333			4		4		6		6							6		6
	Group B Sigma	-0.645497		Ave. Post-Quiz Score	46.6667			6		2		8		2							4		6
	T-Test, 1-Tail, Pre vs Post Quiz	0.274507		Delta Score, Uplift	-6.66667			2		-2		2		-4							-2		0
	Hake's Normalized Gain g	-0.142857		Post-Quiz Scores Std. Dev.	24.2212
	Grade 10, Group A vs B, Quiz 35	Value		Grade 10, Group A vs B, Quiz 35	Value
	T-Test, 1-Tail, A-Pre vs B-Pre	0.293977		Total Valid Quizzes Group A	8
	T-Test, 1-Tail, A-Post vs B-Post	0.242081		Total Valid Quizzes Group B	10
	T-Test, 1-Tail, A-Delta vs B-Delta	0.188226		Std Deviation of Delta Scores A	35.4562
	Total Valid Takers Group A, Min 5	8		Std Deviation of Delta Scores B	29.8887
	Total Valid Takers Group B, Min 5	10		Pooled Std Deviation of Delta A&B	32.4423
				Cohen's Number d	0.468405
	Grade 10, Group A, Statistics	Value		Grade 10, Group A	Ave.		10A01	10A02	10A03	10A04	10A05	10A06	10A07	10A08	10A09	10A10	10A11	10A12	10A13	10A14	10A15	10A16
	Ave. Delta Score Uplift	20		Quiz Modules Taken	1			1	1	1	1	1	1			1			1
	Pre-Quiz Scores Std. Deviation	16.6905		Ave. Pre-Quiz Score	42.5			6	2	4	6	4	2			6			4
	Group A Sigma	1.19829		Ave. Post-Quiz Score	62.5			8	8	2	10	10	6			4			2
	T-Test, 1-Tail, Pre vs Post Quiz	0.0734686		Delta Score, Uplift	20			2	6	-2	4	6	4			-2			-2
	Hake's Normalized Gain g	0.347826		Post-Quiz Scores Std. Dev.	32.8416
	Grade 10, Group B, Statistics	Value		Grade 10, Group B	Ave.		10B01	10B02	10B03	10B04	10B05	10B06	10B07	10B08	10B09	10B10	10B11	10B12	10B13	10B14	10B15	10B16	10B17
	Ave. Delta Score Uplift	34		Quiz Modules Taken	1		1	1		1	1		1		1		1			1	1	1
	Pre-Quiz Scores Std. Deviation	17.5119		Ave. Pre-Quiz Score	38		4	2		2	6		6		2		2			4	6	4
	Group B Sigma	1.94154		Ave. Post-Quiz Score	72		10	4		10	10		6		8		6			8	4	6
	T-Test, 1-Tail, Pre vs Post Quiz	0.000873869		Delta Score, Uplift	34		6	2		8	4		0		6		4			4	-2	2
	Hake's Normalized Gain g	0.548387		Post-Quiz Scores Std. Dev.	23.4758
	Grade 10, Group A vs B, Quiz 41	Value		Grade 10, Group A vs B, Quiz 41	Value
	T-Test, 1-Tail, A-Pre vs B-Pre	0.173297		Total Valid Quizzes Group A	5
	T-Test, 1-Tail, A-Post vs B-Post	0.179448		Total Valid Quizzes Group B	5
	T-Test, 1-Tail, A-Delta vs B-Delta	0.476821		Std Deviation of Delta Scores A	15.0555
	Total Valid Takers Group A, Min 5	5		Std Deviation of Delta Scores B	21.9089
	Total Valid Takers Group B, Min 5	5		Pooled Std Deviation of Delta A&B	18.7972
				Cohen's Number d	0.030429
	Grade 10, Group A, Statistics	Value		Grade 10, Group A	Ave.		10A01	10A02	10A03	10A04	10A05	10A06	10A07	10A08	10A09	10A10	10A11	10A12	10A13	10A14	10A15	10A16
	Ave. Delta Score Uplift	3.33333		Quiz Modules Taken	1				1			1	1			1						1
	Pre-Quiz Scores Std. Deviation	10.9545		Ave. Pre-Quiz Score	52				4			6	6			4						6
	Group A Sigma	0.30429		Ave. Post-Quiz Score	56				6			8	6			2						6
	T-Test, 1-Tail, Pre vs Post Quiz	0.362233		Delta Score, Uplift	3.33333				2			2	0			-2						0		0
	Hake's Normalized Gain g	0.0833333		Post-Quiz Scores Std. Dev.	21.9089
	Grade 10, Group B, Statistics	Value		Grade 10, Group B	Ave.		10B01	10B02	10B03	10B04	10B05	10B06	10B07	10B08	10B09	10B10	10B11	10B12	10B13	10B14	10B15	10B16	10B17
	Ave. Delta Score Uplift	4		Quiz Modules Taken	1									1	1		1		1			1
	Pre-Quiz Scores Std. Deviation	24.4949		Ave. Pre-Quiz Score	40									4	4		6		6			0
	Group B Sigma	0.163299		Ave. Post-Quiz Score	44									6	6		4		4			2
	T-Test, 1-Tail, Pre vs Post Quiz	0.385357		Delta Score, Uplift	4									2	2		-2		-2			2
	Hake's Normalized Gain g	0.0666667		Post-Quiz Scores Std. Dev.	16.7332
	Grade 10, Group A vs B, Quiz 43	Value		Grade 10, Group A vs B, Quiz 43	Value
	T-Test, 1-Tail, A-Pre vs B-Pre	0.390246		Total Valid Quizzes Group A	6
	T-Test, 1-Tail, A-Post vs B-Post	0.408712		Total Valid Quizzes Group B	6
	T-Test, 1-Tail, A-Delta vs B-Delta	0.313947		Std Deviation of Delta Scores A	25.2982
	Total Valid Takers Group A, Min 5	6		Std Deviation of Delta Scores B	20.6559
	Total Valid Takers Group B, Min 5	6		Pooled Std Deviation of Delta A&B	23.094
				Cohen's Number d	-0.322749
	Grade 10, Group A, Statistics	Value		Grade 10, Group A	Ave.		10A01	10A02	10A03	10A04	10A05	10A06	10A07	10A08	10A09	10A10	10A11	10A12	10A13	10A14	10A15	10A16
	Ave. Delta Score Uplift	20		Quiz Modules Taken	1			1	1			1	1			1					1
	Pre-Quiz Scores Std. Deviation	26.5832		Ave. Pre-Quiz Score	43.3333			6	6			6	0			2					6
	Group A Sigma	0.752355		Ave. Post-Quiz Score	63.3333			6	6			6	2			8					10
	T-Test, 1-Tail, Pre vs Post Quiz	0.11087		Delta Score, Uplift	20			0	0			0	2			6					4
	Hake's Normalized Gain g	0.352941		Post-Quiz Scores Std. Dev.	26.5832
	Grade 10, Group B, Statistics	Value		Grade 10, Group B	Ave.		10B01	10B02	10B03	10B04	10B05	10B06	10B07	10B08	10B09	10B10	10B11	10B12	10B13	10B14	10B15	10B16	10B17
	Ave. Delta Score Uplift	13.3333		Quiz Modules Taken	1						1			1	1	1			1			1
	Pre-Quiz Scores Std. Deviation	10.328		Ave. Pre-Quiz Score	46.6667						6			6	4	4			4			4
	Group B Sigma	1.29099		Ave. Post-Quiz Score	60						6			8	6	8			2			6
	T-Test, 1-Tail, Pre vs Post Quiz	0.103638		Delta Score, Uplift	13.3333						0			2	2	4			-2			2
	Hake's Normalized Gain g	0.25		Post-Quiz Scores Std. Dev.	21.9089
	AVERAGE OF QUIZZES
	Group A vs B, School Wide Level	Value		Group A vs B, School Wide Level	Value
	T-Test, 1-Tail, A-Pre vs B-Pre	0.227838		Total Valid Quizzes Group A	8.23404
	T-Test, 1-Tail, A-Post vs B-Post	0.257431		Total Valid Quizzes Group B	7.38298
	T-Test, 1-Tail, A-Delta vs B-Delta	0.263431		Std Deviation of Delta Scores A	24.6596
	Total Valid Takers Group A, Min 5	8.23404		Std Deviation of Delta Scores B	26.1784
	Total Valid Takers Group B, Min 5	7.38298		Pooled Std Deviation of Delta A&B	25.8284
				Cohen's Number d	0.126355
	Group A Statistics, School Wide	Value		Group A Statistics, School Wide	Ave.
	Ave. Delta Score Uplift	6.77492		Quiz Modules Taken	1
	Pre-Quiz Scores Std. Deviation	17.6703		Ave. Pre-Quiz Score	40.683
	Group A Sigma	0.386118		Ave. Post-Quiz Score	47.4579
	T-Test, 1-Tail, Pre vs Post Quiz	0.223282		Delta Score, Uplift	6.77492
	Hake's Normalized Gain g	0.11144		Post-Quiz Scores Std. Dev.	22.915
	Group B Statistics, School Wide	Value		Group B Statistics, School Wide	Ave.
	Ave. Delta Score Uplift	9.40352		Quiz Modules Taken	1
	Pre-Quiz Scores Std. Deviation	17.5805		Ave. Pre-Quiz Score	41.1501
	Group B Sigma	0.494984		Ave. Post-Quiz Score	50.5536
	T-Test, 1-Tail, Pre vs Post Quiz	0.183774		Delta Score, Uplift	9.40352
	Hake's Normalized Gain g	0.160882		Post-Quiz Scores Std. Dev.	24.0545
	Group A vs B, Elementary Level	Value		Group A vs B, Elementary Level	Value
	T-Test, 1-Tail, A-Pre vs B-Pre	0.198561		Total Valid Quizzes Group A	7.64706
	T-Test, 1-Tail, A-Post vs B-Post	0.275689		Total Valid Quizzes Group B	7.41176
	T-Test, 1-Tail, A-Delta vs B-Delta	0.291774		Std Deviation of Delta Scores A	27.049
	Total Valid Takers Group A, Min 5	7.64706		Std Deviation of Delta Scores B	25.9403
	Total Valid Takers Group B, Min 5	7.41176		Pooled Std Deviation of Delta A&B	26.8972
				Cohen's Number d	0.0507504
	Group A Statistics, Elementary	Value		Group A Statistics, Elementary	Ave.
	Ave. Delta Score Uplift	9.09295		Quiz Modules Taken	1
	Pre-Quiz Scores Std. Deviation	17.372		Ave. Pre-Quiz Score	34.9629
	Group A Sigma	0.508542		Ave. Post-Quiz Score	44.0558
	T-Test, 1-Tail, Pre vs Post Quiz	0.18493		Delta Score, Uplift	9.09295
	Hake's Normalized Gain g	0.14145		Post-Quiz Scores Std. Dev.	24.3157
	Group B Statistics, Elementary	Value		Group B Statistics, Elementary	Ave.
	Ave. Delta Score Uplift	10.1536		Quiz Modules Taken	1
	Pre-Quiz Scores Std. Deviation	17.7919		Ave. Pre-Quiz Score	34.9959
	Group B Sigma	0.460927		Ave. Post-Quiz Score	45.1495
	T-Test, 1-Tail, Pre vs Post Quiz	0.136795		Delta Score, Uplift	10.1536
	Hake's Normalized Gain g	0.154793		Post-Quiz Scores Std. Dev.	23.4574
	Group A vs B, High School Level	Value		Group A vs B, High School Level	Value
	T-Test, 1-Tail, A-Pre vs B-Pre	0.231015		Total Valid Quizzes Group A	8.56667
	T-Test, 1-Tail, A-Post vs B-Post	0.247085		Total Valid Quizzes Group B	7.36667
	T-Test, 1-Tail, A-Delta vs B-Delta	0.24737		Std Deviation of Delta Scores A	23.3057
	Total Valid Takers Group A, Min 5	8.56667		Std Deviation of Delta Scores B	26.3133
	Total Valid Takers Group B, Min 5	7.36667		Pooled Std Deviation of Delta A&B	25.2228
				Cohen's Number d	0.169197
	Group A Statistics, High School	Value		Group A Statistics, High School	Ave.
	Ave. Delta Score Uplift	5.46138		Quiz Modules Taken	1
	Pre-Quiz Scores Std. Deviation	17.8393		Ave. Pre-Quiz Score	43.9243
	Group A Sigma	0.316745		Ave. Post-Quiz Score	49.3857
	T-Test, 1-Tail, Pre vs Post Quiz	0.245015		Delta Score, Uplift	5.46138
	Hake's Normalized Gain g	0.0944347		Post-Quiz Scores Std. Dev.	22.1212
	Group B Statistics, High School	Value		Group B Statistics, High School	Ave.
	Ave. Delta Score Uplift	8.9785		Quiz Modules Taken	1
	Pre-Quiz Scores Std. Deviation	17.4607		Ave. Pre-Quiz Score	44.6375
	Group B Sigma	0.514282		Ave. Post-Quiz Score	53.616
	T-Test, 1-Tail, Pre vs Post Quiz	0.210395		Delta Score, Uplift	8.9785
	Hake's Normalized Gain g	0.164333		Post-Quiz Scores Std. Dev.	24.3929
	COUNT OF MODULES
	Count of Positive Cohen's d	26
	Total Count	51
[truncated: 90 more columns]
